# Supplementary material for: Synthesis of γ-amino acids via photocatalyzed intermolecular carboimination of alkenes
Source: Royal Society of Chemistry journal article supplement (doi:10.1039/d2qo00741j), 2022-01-01

## Supporting Information

### **Synthesis of $\gamma$ -amino acids *via* photocatalyzed intermolecular carboimination of alkenes**

Xinhua Wang,<sup>a</sup> Yi Chen,<sup>a</sup> Ping Liang,<sup>a</sup> Jian-Qiang Chen<sup>\*a</sup> and Jie Wu<sup>\*a,b,c</sup>

<sup>a</sup>School of Pharmaceutical and Materials Engineering & Institute for Advanced Studies, Taizhou University, Taizhou 318000, China.

<sup>b</sup>State Key Laboratory of Organometallic Chemistry, Shanghai Institute of Organic Chemistry, Chinese Academy of Sciences, Shanghai 200032, China.

<sup>c</sup>School of Chemistry and Chemical Engineering, Henan Normal University, Xinxiang 453007, China.

*Corresponding author:* [chenjq@tzc.edu.cn](mailto:chenjq@tzc.edu.cn); [jie\\_wu@fudan.edu.cn](mailto:jie_wu@fudan.edu.cn)

## Contents

|                                                       |    |
|-------------------------------------------------------|----|
| 1. General information.....                           | 2  |
| 2. General experimental procedure.....                | 3  |
| 3. Devices for the photocatalytic reactions.....      | 5  |
| 4. Initial studies and the reaction optimization..... | 6  |
| 5. Characterization of all products.....              | 7  |
| 6. References.....                                    | 25 |
| 7. NMR spectra of compounds .....                     | 26 |

## 1. General information

All glassware was thoroughly oven-dried. Chemicals and solvents were either purchased from commercial suppliers or purified by standard techniques. Thin-layer chromatography plates were visualized by exposure to ultraviolet light and/or staining with phosphomolybdic acid followed by heating on a hot plate. Flash chromatography was carried out using silica gel (200–300 mesh).  $^1\text{H}$  NMR and  $^{13}\text{C}$  NMR spectra were recorded on a Bruker AM-400 (400 MHz). The spectra were recorded in deuteriochloroform ( $\text{CDCl}_3$ ) as solvent at room temperature,  $^1\text{H}$  and  $^{13}\text{C}$  NMR chemical shifts are reported in ppm relative to the residual solvent peak. The residual solvent signals were used as references and the chemical shifts were converted to the TMS scale ( $\text{CDCl}_3$ :  $\delta_{\text{H}} = 7.26$  ppm,  $\delta_{\text{C}} = 77.0$  ppm). Data for  $^1\text{H}$  NMR are reported as follows: chemical shift ( $\delta$  ppm), multiplicity (s = singlet, d = doublet, t = triplet, m = multiplet, dd = doublet, br = broad), integration, coupling constant (Hz) and assignment. Data for  $^{13}\text{C}$  NMR are reported as chemical shift. Electrospray-ionisation HRMS data were acquired on a Q-TOF mass spectrometer (Waters SYNAPT G2-Si) LC-MS TOF.

## 2. General experimental procedure

### 2.1 General procedure for the preparation of oxime esters<sup>1</sup>

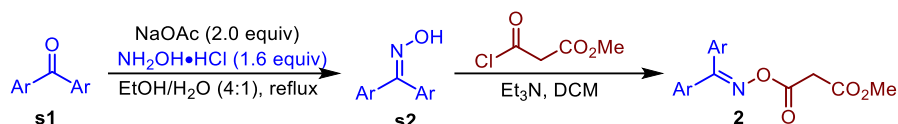

**Step 1:** In a 100 mL round bottom flask equipped with a condenser, aromatic ketones **s1** (20 mmol, 1.0 equiv) were dissolved in the mixture of EtOH/H<sub>2</sub>O (v/v, 4:1, 50 mL). Then, hydroxylamine hydrochloride (2.2 g, 32 mmol, 1.6 equiv) and NaOAc (3.3 g, 40 mmol, 2.0 equiv) were added in one portion. The reaction mixture was refluxed overnight and the consumption of the starting material was observed by TLC. The reaction mixture was cooled down to room temperature, and then EtOH was removed under reduced pressure. The resulting mixture was extracted with EtOAc. The organic layer was then washed with brine and dried over Na<sub>2</sub>SO<sub>4</sub>. The solvent was removed under vacuum to give oxime **s2**, not further purified.

**Step 2:** To a mixture of oxime **s2** (10 mmol) and CH<sub>2</sub>Cl<sub>2</sub> (50 mL) was slowly added methyl malonyl chloride (1.6 g, 12 mmol, 1.2 equiv), Et<sub>3</sub>N (1.5 g, 15 mmol, 1.5 equiv) at 0 °C. The solution was stirred at rt for overnight. The product was washed with saturated NaHCO<sub>3</sub> and the aqueous layer was extracted with CH<sub>2</sub>Cl<sub>2</sub>. The organic layer was dried over Na<sub>2</sub>SO<sub>4</sub>. The solvent was removed under reduced pressure and the residue was washed with PE to afford the desired product **2**.

### 2.2 General procedure for the preparation of $\gamma$ -amino acid ester

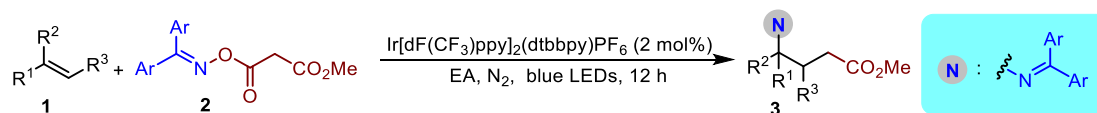

All optimization reactions were set up in a glove box under N<sub>2</sub> atmosphere. Substrate **1** (0.2 mmol, 1.0 equiv) and oxime ester **2** (0.3 mmol, 1.5 equiv) were added to a solution of photocatalyst Ir[dF(CF<sub>3</sub>)ppy]<sub>2</sub>(dtbbpy)PF<sub>6</sub> (2 mol %) in dry EA (4 mL) at room temperature. The heterogenous mixture was placed in the irradiation apparatus equipped with blue LEDs. The resulting mixture was stirred at rt for 12 h.

Upon completion of the reaction, the resulting crude residue was concentrated in vacuum and purified by column chromatography with gradient eluents to afford the desired product **3**.

### 2.3 General procedure for the preparation of $\gamma$ -lactams

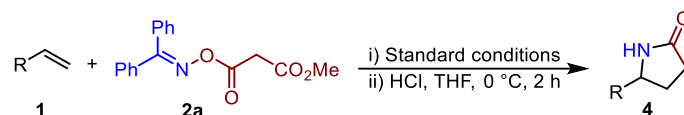

**Step 1:** All optimization reactions were set up in a glove box under  $N_2$  atmosphere. Substrate **1** (0.2 mmol, 1.0 equiv) and oxime ester **2a** (0.3 mmol, 1.5 equiv) were added to a solution of photocatalyst  $Ir[dF(CF_3)ppy]_2(dtbbpy)PF_6$  (2 mol %) in dry EA (4 mL) at room temperature. The heterogenous mixture was placed in the irradiation apparatus equipped with blue LEDs. The resulting mixture was stirred at rt for 12 h. The solvent was then evaporated, and the crude product **3** was used in the following step without further purification.

**Step 2:** The crude product **3** was dissolved into THF (3.0 ml), and 1 M HCl (0.3 mL) was added at 0 °C. After the solution was stirred for 2 h, THF was removed in vacuo, and neutralized with  $NaHCO_3$ . The mixture was then extracted with  $CH_2Cl_2$  three times. The organic layer was dried over  $Na_2SO_4$ . The solvent was removed under reduced pressure and the residue was isolated by column chromatography with gradient eluents (EA/ $Et_3N$  = 50/1) to provide **4**.

### 2.4 synthetic 3-carboxy-1-(p-tolyl)propan-1-aminium chloride

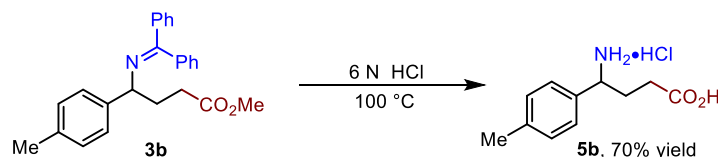

A 4 mL vial was charged with **3b** (0.10 mmol, 1.0 equiv.) and 6 M HCl (1.0 mL) and the solution was stirred overnight at 100 °C. After consumption of starting material was confirmed by TLC analysis, the solution was poured into 1 N HCl (5.0 mL) and extracted with diethyl ether (3 x 5.0 mL). The water layer was combined and water was removed in vacuo, and the product was obtained.

### 3. Devices for the photocatalytic reactions.

Irradiation of visible light was performed with a 36 W Blue LED strip. All photocatalyzed reactions were carried out at room temperature with fan-assisted cooling to maintain a temperature of 35-40 °C. The distance between tube and lamp was approximately 3 cm.

Manufacture of the light source: LED strip

Manufacturer: Greethink

Model: GT-5050-Blue

Wavelength of peak intensity: 460-470 nm

Material of the irradiation vessel: borosilicate glass

Distance of the irradiation vessel from the light source: approximately 3 cm.

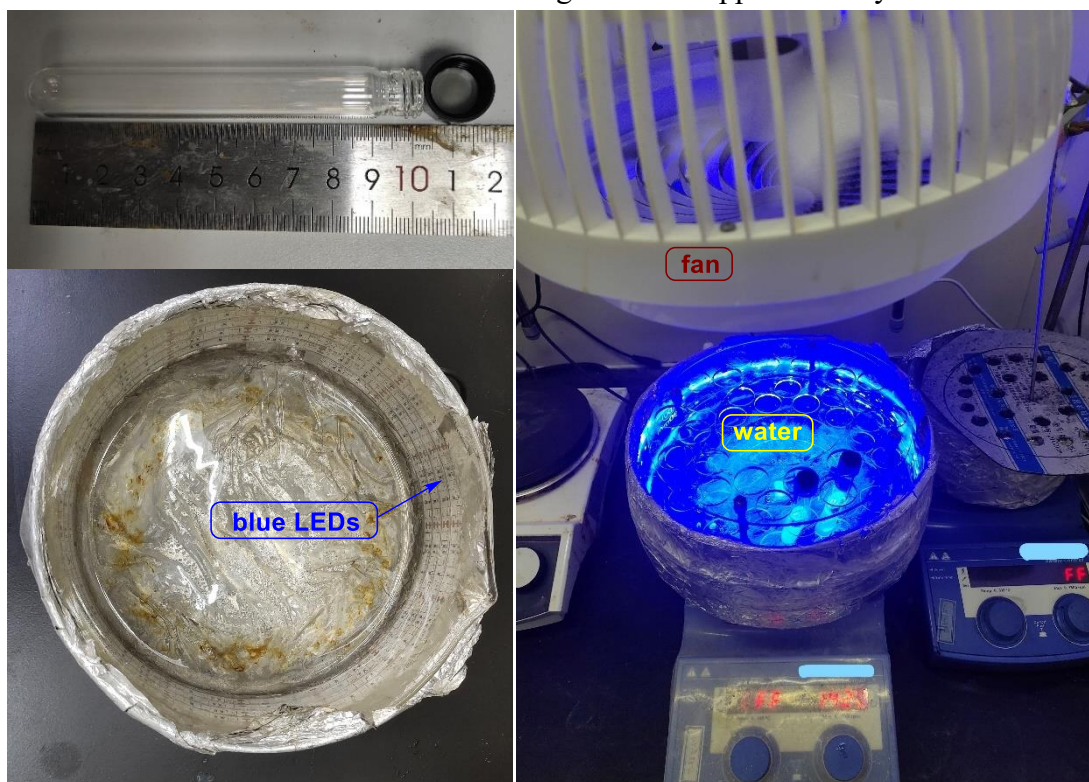

Figure S1. Devices for the photocatalytic reactions

## 4. Initial studies and the reaction optimization<sup>a,b</sup>

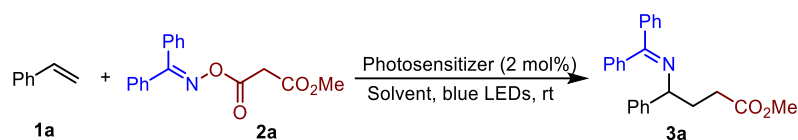

| Entry           | Photocatalyst                                                    | Solvent            | Time | Yield (%) |
|-----------------|------------------------------------------------------------------|--------------------|------|-----------|
| 1               | Ir(ppy) <sub>3</sub>                                             | MeCN               | 36 h | trace     |
| 2               | Ir(ppy) <sub>2</sub> (dtbbpy)PF <sub>6</sub>                     | MeCN               | 36 h | 66        |
| 3               | Ir[d(Me)ppy] <sub>2</sub> (dtbbpy)PF <sub>6</sub>                | MeCN               | 36 h | trace     |
| 4               | Ir[dF(CF <sub>3</sub> )ppy] <sub>2</sub> (dtbbpy)PF <sub>6</sub> | MeCN               | 36 h | 68        |
| 5               | Ir[dF(CF <sub>3</sub> )ppy] <sub>2</sub> (ppy)PF <sub>6</sub>    | MeCN               | 36 h | 64        |
| 6               | Ru(bpy) <sub>3</sub> Cl <sub>2</sub>                             | MeCN               | 36 h | trace     |
| 7               | Eosin Y                                                          | MeCN               | 36 h | trace     |
| 8               | Mes-Acr-ClO <sub>4</sub>                                         | MeCN               | 36 h | trace     |
| 9               | 5CzBN                                                            | MeCN               | 36 h | 33        |
| 10              | 4CzIPN                                                           | MeCN               | 36 h | trace     |
| 11              | 3DPA2FBN                                                         | MeCN               | 36 h | trace     |
| 12              | Thioxanthone                                                     | MeCN               | 36 h | trace     |
| 13              | Ir[dF(CF <sub>3</sub> )ppy] <sub>2</sub> (dtbbpy)PF <sub>6</sub> | DCE                | 36 h | 20        |
| 14              | Ir[dF(CF <sub>3</sub> )ppy] <sub>2</sub> (dtbbpy)PF <sub>6</sub> | EA                 | 36 h | 72        |
| 15              | Ir[dF(CF <sub>3</sub> )ppy] <sub>2</sub> (dtbbpy)PF <sub>6</sub> | THF                | 36 h | 24        |
| 16              | Ir[dF(CF <sub>3</sub> )ppy] <sub>2</sub> (dtbbpy)PF <sub>6</sub> | 1,4-dioxane        | 36 h | 45        |
| 17              | Ir[dF(CF <sub>3</sub> )ppy] <sub>2</sub> (dtbbpy)PF <sub>6</sub> | Acetone            | 36 h | 69        |
| 18              | Ir[dF(CF <sub>3</sub> )ppy] <sub>2</sub> (dtbbpy)PF <sub>6</sub> | CH <sub>3</sub> OH | 36 h | 50        |
| 19              | Ir[dF(CF <sub>3</sub> )ppy] <sub>2</sub> (dtbbpy)PF <sub>6</sub> | DMF                | 36 h | 32        |
| 20              | Ir[dF(CF <sub>3</sub> )ppy] <sub>2</sub> (dtbbpy)PF <sub>6</sub> | Toluene            | 36 h | 33        |
| 21              | Ir[dF(CF <sub>3</sub> )ppy] <sub>2</sub> (dtbbpy)PF <sub>6</sub> | Methyl acetate     | 36 h | 71        |
| 22              | Ir[dF(CF <sub>3</sub> )ppy] <sub>2</sub> (dtbbpy)PF <sub>6</sub> | Butyl acetate      | 36 h | 68        |
| 23              | Ir[dF(CF <sub>3</sub> )ppy] <sub>2</sub> (dtbbpy)PF <sub>6</sub> | EA                 | 12 h | 72        |
| 24              | -                                                                | EA                 | 12 h | NR        |
| 25 <sup>c</sup> | Ir[dF(CF <sub>3</sub> )ppy] <sub>2</sub> (dtbbpy)PF <sub>6</sub> | EA                 | 12 h | NR        |

<sup>a</sup>Reaction conditions: styrene **1a** (0.2 mmol), **2a** (0.3 mmol), photocatalyst (0.004 mmol), solvent (4 mL), blue LEDs, under a N<sub>2</sub> atmosphere. <sup>b</sup>Determined by <sup>1</sup>H NMR analysis using 1,3,5-trimethoxybenzene as an internal standard. [c] In the dark.

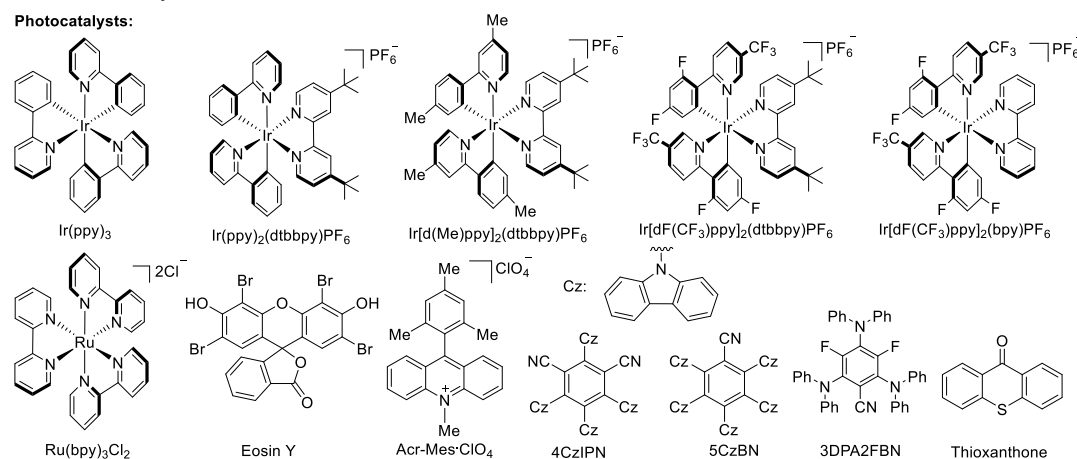

## 5. Characterization of all products

### *Methyl 4-((diphenylmethylene)amino)-4-phenylbutanoate (3a)*

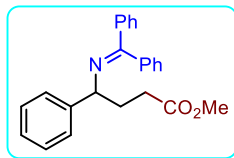

Purification by flash chromatography (petroleum ether/ Et<sub>3</sub>N = 15/1). Colorless oil; 67% yield; <sup>1</sup>H NMR (400 MHz, CDCl<sub>3</sub>) δ (ppm) = 7.68 (dd, *J* = 8.0, 1.2 Hz, 2H), 7.42–7.28 (m, 10H), 7.23–7.20 (m, 1H), 7.04–7.02 (m, 2H), 4.39–4.36 (m, 1H), 3.56 (s, 3H), 2.30–2.13 (m, 4H); <sup>13</sup>C NMR (100 MHz, CDCl<sub>3</sub>) δ (ppm) = 173.9, 167.4, 144.3, 139.8, 136.8, 130.0, 128.6, 128.4, 128.0, 127.7, 127.1, 126.8, 65.4, 51.5, 45.6, 34.4, 31.0; HRMS (ESI) for C<sub>24</sub>H<sub>24</sub>NO<sub>2</sub> [M+H]<sup>+</sup> calcd. 358.1802, found: 358.1808.

### *Methyl 4-((diphenylmethylene)amino)-4-(p-tolyl)butanoate (3b)*

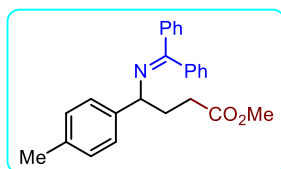

Purification by flash chromatography (petroleum ether/ Et<sub>3</sub>N = 15/1). Colorless oil; 94% yield; <sup>1</sup>H NMR (400 MHz, CDCl<sub>3</sub>) δ = (ppm) 7.68–7.65 (m, 2H), 7.41–7.39 (m, 3H), 7.36–7.29 (m, 3H), 7.18 (d, *J* = 8.0 Hz, 2H), 7.09 (d, *J* = 8.0 Hz, 2H), 7.05–7.01 (m, 2H), 4.34 (t, *J* = 7.2 Hz, 1H), 3.55 (s, 3H), 2.31 (s, 3H), 2.29–2.10 (m, 4H); <sup>13</sup>C NMR (100 MHz, CDCl<sub>3</sub>) δ (ppm) = 174.0, 167.1, 141.3, 139.8, 136.9, 136.4, 130.0, 129.1, 128.6, 128.4, 128.0, 127.8, 127.0, 65.2, 51.4, 34.4, 31.1, 21.1; HRMS (ESI) for C<sub>25</sub>H<sub>26</sub>NO<sub>2</sub> [M+H]<sup>+</sup> calcd. 372.1958, found: 372.1969.

### *Methyl 4-((diphenylmethylene)amino)-4-(4-methoxyphenyl)butanoate (3c)*

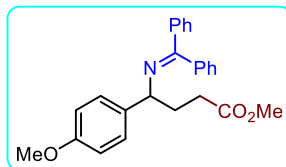

Purification by flash chromatography (petroleum ether/ Et<sub>3</sub>N = 15/1). Colorless oil; 62% yield; <sup>1</sup>H NMR (400 MHz, CDCl<sub>3</sub>) δ (ppm) = 7.68–7.65 (m, 2H), 7.42–7.30 (m, 6H), 7.21–7.19 (m, 2H), 7.05–7.02 (m, 2H), 6.85–6.81 (m, 2H), 4.34–4.31 (m, 1H), 3.78 (s, 3H), 3.56 (s, 3H), 2.28–2.08 (m, 4H); <sup>13</sup>C NMR (100 MHz, CDCl<sub>3</sub>) δ (ppm) = 174.0, 167.1, 158.4, 139.8, 136.9, 136.5, 130.0, 128.6, 128.3, 128.1, 128.0, 127.7, 113.8, 64.8, 55.3, 51.4, 34.4, 31.0; HRMS (ESI) for C<sub>25</sub>H<sub>26</sub>NO<sub>3</sub> [M+H]<sup>+</sup> calcd. 388.1907, found: 388.1908.

### Methyl 4-(4-(tert-butyl)phenyl)-4-((diphenylmethylene)amino)butanoate (3d)

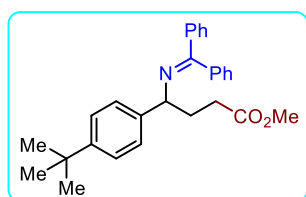

Purification by flash chromatography (petroleum ether/  
Et<sub>3</sub>N = 15/1). Colorless oil; 78% yield; <sup>1</sup>H NMR (400 MHz,  
CDCl<sub>3</sub>) δ (ppm) = 7.68–7.65 (m, 2H), 7.43–7.41 (m, 3H),  
7.36–7.29 (m, 5H), 7.24–7.22 (m, 2H), 7.07–7.05 (m, 2H),  
4.36 (t, *J* = 6.8 Hz, 1H), 3.55 (s, 3H), 2.28–2.11 (m, 4H), 1.30 (s, 9H); <sup>13</sup>C NMR (100  
MHz, CDCl<sub>3</sub>) δ (ppm) = 174.0, 166.9, 149.6, 141.1, 139.8, 136.9, 129.9, 128.6, 128.3,  
128.3, 128.0, 127.8, 126.7, 125.2, 65.2, 51.4, 34.4, 34.3, 31.4, 31.0, 29.7; HRMS (ESI)  
for C<sub>28</sub>H<sub>32</sub>NO<sub>2</sub> [M+H]<sup>+</sup> calcd. 414.2428, found: 414.2430.

### Methyl 4-((diphenylmethylene)amino)-4-(4-fluorophenyl)butanoate (3e)

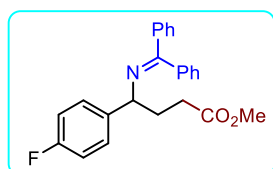

Purification by flash chromatography (petroleum ether/ Et<sub>3</sub>N =  
15/1). Colorless oil, 92% yield; <sup>1</sup>H NMR (400 MHz, CDCl<sub>3</sub>)  
δ (ppm) = 7.68–7.65 (m, 2H), 7.41 (dd, *J* = 6.4, 2.4 Hz, 3H),  
7.38–7.30 (m, 3H), 7.27–7.23 (m, 2H), 7.03–6.95 (m, 4H), 4.36 (dd, *J* = 6.0, 1.6 Hz,  
1H), 3.56 (s, 3H), 2.28–2.08 (m, 4H); <sup>13</sup>C NMR (100 MHz, CDCl<sub>3</sub>) δ (ppm) = 173.8,  
167.6, 161.7 (d, *J* = 243.1 Hz), 140.0 (d, *J* = 3.2 Hz), 139.6, 136.8, 130.2, 128.6,  
128.6, 128.5, 128.5, 128.4, 128.1, 127.6, 115.3, 115.0, 64.7, 51.5, 34.5, 30.9; HRMS  
(ESI) for C<sub>24</sub>H<sub>23</sub>FO<sub>2</sub> [M+H]<sup>+</sup> calcd. 376.1707, found: 376.1707.

### Methyl 4-(4-chlorophenyl)-4-((diphenylmethylene)amino)butanoate (3f)

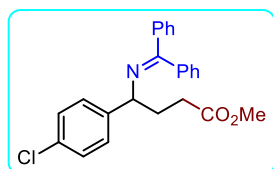

Purification by flash chromatography (petroleum ether/ Et<sub>3</sub>N =  
15/1). Colorless oil; 76% yield; <sup>1</sup>H NMR (400 MHz, CDCl<sub>3</sub>)  
δ (ppm) = 7.68–7.65 (m, 2H), 7.42–7.31 (m, 6H), 7.27–7.21 (m,  
4H), 7.02–7.00 (m, 2H), 4.35 (dd, *J* = 7.6, 5.2 Hz, 1H), 3.56 (s, 3H), 2.28–2.09 (m,  
4H); <sup>13</sup>C NMR (100 MHz, CDCl<sub>3</sub>) δ (ppm) = 173.7, 167.8, 142.8, 139.5, 136.7,  
132.5, 130.2, 128.6, 128.5, 128.5, 128.4, 128.4, 128.1, 127.6, 64.7, 51.5, 34.4, 30.9;  
HRMS (ESI) for C<sub>24</sub>H<sub>23</sub>ClNO<sub>2</sub> [M+H]<sup>+</sup> calcd. 392.1412, found: 392.1417.



### Methyl 4-(4-bromophenyl)-4-((diphenylmethylene)amino)butanoate (3g)

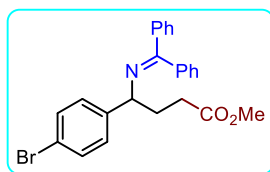

Purification by flash chromatography (petroleum ether/ Et<sub>3</sub>N = 15/1). Colorless oil; 58% yield; <sup>1</sup>H NMR (400 MHz, CDCl<sub>3</sub>) δ (ppm) = 7.67–7.65 (m, 2H), 7.42–7.31(m, 8H), 7.17 (d, *J* = 8.4 Hz, 2H), 7.02–7.00 (m, 2H), 4.34 (dd, *J* = 7.6, 5.2 Hz, 1H), 3.56 (s, 3H), 2.28–2.09 (m, 4H); <sup>13</sup>C NMR (100 MHz, CDCl<sub>3</sub>) δ (ppm) = 173.7, 167.9, 143.4, 139.5, 136.7, 131.5, 130.2, 128.8, 128.5, 128.5, 128.1, 127.6, 120.6, 64.8, 51.5, 34.3, 30.8; HRMS (ESI) for C<sub>24</sub>H<sub>23</sub>BrNO<sub>2</sub> [M+H]<sup>+</sup> calcd. 436.0907, found: 436.0915.

### Methyl 4-((diphenylmethylene)amino)-4-(4-iodophenyl)butanoate (3h)

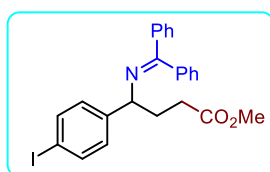

Purification by flash chromatography (petroleum ether/ Et<sub>3</sub>N = 15/1). Colorless oil; 69% yield; <sup>1</sup>H NMR (400 MHz, CDCl<sub>3</sub>) δ (ppm) = 7.63 (dd, *J* = 19.6, 8.0 Hz, 4H), 7.42–7.31 (m, 6H), 7.06–7.00 (m, 4H), 4.33–4.31 (m, 1H), 3.56 (s, 3H), 2.28–2.08 (m, 4H); <sup>13</sup>C NMR (100 MHz, CDCl<sub>3</sub>) δ (ppm) = 173.7, 167.9, 144.1, 139.5, 137.5, 136.7, 130.2, 129.1, 128.6, 128.5, 128.5, 128.1, 127.6, 92.2, 64.8, 51.5, 34.3, 30.8; HRMS (ESI) for C<sub>24</sub>H<sub>23</sub>INO<sub>2</sub> [M+H]<sup>+</sup> calcd. 484.0768, found: 484.0777.

### Methyl 4-(1-((diphenylmethylene)amino)-4-methoxy-4-oxobutyl)benzoate (3i)

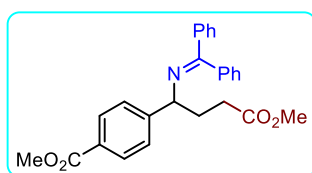

Purification by flash chromatography (petroleum ether/ Et<sub>3</sub>N = 15/1). Colorless oil; 40% yield; <sup>1</sup>H NMR (400 MHz, CDCl<sub>3</sub>) δ (ppm) = 7.67–7.65 (m, 2H), 7.42–7.39 (m, 3H), 7.38–7.29 (m, 5H), 7.04–7.00 (m, 4H), 4.38 (dd, *J* = 7.2, 5.6 Hz, 1H), 3.55 (s, 3H), 2.29–2.10 (m, 7H); <sup>13</sup>C NMR (100 MHz, CDCl<sub>3</sub>) δ (ppm) = 173.8, 169.5, 167.5, 149.4, 141.8, 139.6, 136.7, 130.1, 128.6, 128.4, 128.0, 127.8, 121.4, 64.8, 51.5, 34.4, 30.9, 21.2; HRMS (ESI) for C<sub>26</sub>H<sub>26</sub>NO<sub>4</sub> [M+H]<sup>+</sup> calcd. 416.1856, found: 416.1862.

### Methyl 4-(4-cyanophenyl)-4-((diphenylmethylene)amino)butanoate (3j)

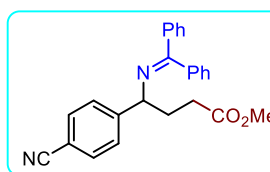

Purification by flash chromatography (petroleum ether/ Et<sub>3</sub>N = 15/1). Colorless oil; 46% yield; <sup>1</sup>H NMR (400 MHz,

**CDCl<sub>3</sub>**)  $\delta$  (ppm) = 7.67 (d,  $J$  = 7.6 Hz, 2H), 7.59 (d,  $J$  = 8.0 Hz, 2H), 7.43–7.33 (m, 8H), 6.99–6.97 (m, 2H), 4.44 (dd,  $J$  = 7.6, 5.2 Hz, 1H), 3.56 (s, 3H), 2.30–2.11 (m, 4H); **<sup>13</sup>C NMR (100 MHz, CDCl<sub>3</sub>)**  $\delta$  (ppm) = 173.5, 168.7, 149.9, 139.3, 136.5, 132.3, 130.5, 128.7, 128.6, 128.6, 128.1, 127.9, 127.5, 119.0, 110.7, 64.9, 51.6, 34.2, 30.7; HRMS (ESI) for C<sub>25</sub>H<sub>23</sub>N<sub>2</sub>O<sub>2</sub> [M+H]<sup>+</sup> calcd. 383.1754, found: 383.1768.

#### **Methyl 4-((diphenylmethylene)amino)-4-(4-(trifluoromethyl)phenyl)butanoate (3k)**

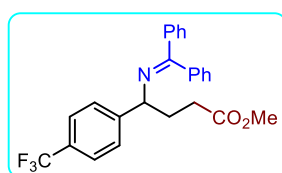

Purification by flash chromatography (petroleum ether/ Et<sub>3</sub>N = 15/1). Colorless oil; 65% yield; **<sup>1</sup>H NMR (400 MHz, CDCl<sub>3</sub>)**  $\delta$  (ppm) = 7.68 (d,  $J$  = 7.6 Hz, 2H), 7.55 (d,  $J$  = 8.0 Hz, 2H), 7.43–7.32 (m, 8H), 7.01 (d,  $J$  = 4.0 Hz, 2H), 4.46–4.43 (m, 1H), 3.56 (s, 3H), 2.30–2.14 (m, 4H); **<sup>13</sup>C NMR (100 MHz, CDCl<sub>3</sub>)**  $\delta$  (ppm) = 173.6, 168.3, 148.4, 139.4, 136.6, 130.3, 129.1 (q,  $J$  = 32.2 Hz), 128.6, 128.6, 128.5, 128.1, 127.6, 127.4, 125.3 (q,  $J$  = 3.8 Hz), 124.3 (q,  $J$  = 270.2 Hz), 65.0, 51.5, 34.3, 30.8; HRMS (ESI) for C<sub>25</sub>H<sub>23</sub>F<sub>3</sub>NO<sub>2</sub> [M+H]<sup>+</sup> calcd. 426.1675, found: 426.1680.

#### **Methyl 4-((diphenylmethylene)amino)-4-(o-tolyl)butanoate (3l)**

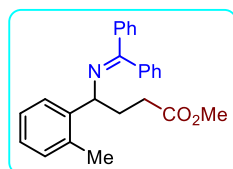

Purification by flash chromatography (petroleum ether/ Et<sub>3</sub>N = 15/1). Colorless oil; 76% yield; **<sup>1</sup>H NMR (400 MHz, CDCl<sub>3</sub>)**  $\delta$  (ppm) = 7.70–7.68 (m, 2H), 7.63 (d,  $J$  = 7.6 Hz, 1H), 7.39–7.31 (m, 6H), 7.16 (t,  $J$  = 7.2 Hz, 1H), 7.09 (td,  $J$  = 7.2, 1.2 Hz, 1H), 7.03 (d,  $J$  = 7.2 Hz, 1H), 6.94–6.92 (m, 2H), 4.57 (dd,  $J$  = 8.4, 4.0 Hz, 1H), 3.57 (s, 3H), 2.38–2.34 (m, 2H), 2.23–2.05 (m, 2H), 1.89 (s, 3H); **<sup>13</sup>C NMR (100 MHz, CDCl<sub>3</sub>)**  $\delta$  (ppm) = 172.9, 166.6, 142.3, 138.7, 136.3, 133.2, 129.1, 129.0, 127.5, 127.3, 127.2, 127.0, 126.5, 125.3, 125.1, 60.2, 50.4, 32.5, 30.1, 17.7; HRMS (ESI) for C<sub>25</sub>H<sub>26</sub>NO<sub>2</sub> [M+H]<sup>+</sup> calcd. 372.1958, found: 372.1964.

#### **Methyl 4-((diphenylmethylene)amino)-4-(m-tolyl)butanoate (3m)**

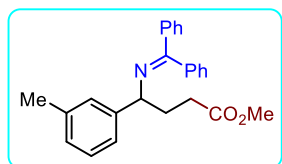

Purification by flash chromatography (petroleum ether/ Et<sub>3</sub>N = 15/1). Colorless oil; 72% yield; **<sup>1</sup>H NMR (400 MHz,**

**CDCl<sub>3</sub>**)  $\delta$  (ppm) = 7.69–7.66 (m, 2H), 7.42–7.39 (m, 3H), 7.37–7.30 (m, 3H), 7.17 (t,  $J = 7.6$  Hz, 1H), 7.11 (s, 1H), 7.08–7.01 (m, 4H), 4.34 (dd,  $J = 7.2, 5.6$  Hz, 1H), 3.56 (s, 3H), 2.32 (s, 3H), 2.29–2.10 (m, 4H); **<sup>13</sup>C NMR (100 MHz, CDCl<sub>3</sub>)**  $\delta$  (ppm) = 172.9, 166.2, 143.2, 138.8, 136.9, 135.8, 129.0, 127.6, 127.3, 127.2, 127.0, 126.7, 126.7, 126.6, 123.1, 64.4, 50.4, 33.4, 30.0, 20.5; HRMS (ESI) for C<sub>25</sub>H<sub>26</sub>NO<sub>2</sub> [M+H]<sup>+</sup> calcd. 372.1958, found: 372.1970.

#### **Methyl 4-((diphenylmethylene)amino)-4-(2-fluorophenyl)butanoate (3n)**

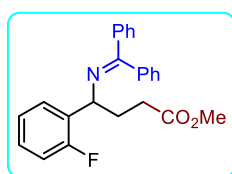

Purification by flash chromatography (petroleum ether/ Et<sub>3</sub>N = 15/1). Colorless oil; 68% yield; **<sup>1</sup>H NMR (400 MHz, CDCl<sub>3</sub>)**  $\delta$  (ppm) = 7.71–7.64 (m, 3H), 7.41–7.31 (m, 6H), 7.21–7.15 (m, 1H), 7.11 (td,  $J = 7.6, 1.2$  Hz, 1H), 7.03–7.00 (m, 2H), 6.97–6.92 (m, 1H), 4.76 (dd,  $J = 11.6, 6.2$  Hz, 1H), 3.56 (s, 3H), 2.32–2.14 (m, 4H); **<sup>13</sup>C NMR (100 MHz, CDCl<sub>3</sub>)**  $\delta$  (ppm) = 172.8, 167.3, 158.5 (d,  $J = 244.2$  Hz, 1H), 138.6, 135.7, 130.2 (d,  $J = 13.2$  Hz, 1H), 129.1, 128.0 (d,  $J = 4.7$  Hz, 1H), 127.6, 127.4, 127.4, 127.0 (d,  $J = 8.1$  Hz, 1H), 127.0, 127.0, 126.5, 123.2 (d,  $J = 3.5$  Hz, 1H), 114.1 (d,  $J = 22.0$  Hz, 1H), 57.0, 50.4, 32.1, 29.8; HRMS (ESI) for C<sub>24</sub>H<sub>23</sub>FNO<sub>2</sub> [M+H]<sup>+</sup> calcd. 376.1707, found: 376.1706.

#### **Methyl 4-(3-chlorophenyl)-4-((diphenylmethylene)amino)butanoate (3o)**

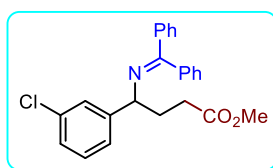

Purification by flash chromatography (petroleum ether/ Et<sub>3</sub>N = 15/1). Colorless oil; 62% yield; **<sup>1</sup>H NMR (400 MHz, CDCl<sub>3</sub>)**  $\delta$  (ppm) = 7.69–7.67(m, 2H), 7.43–7.32 (m, 7H), 7.21–7.14 (m, 3H), 7.03–7.01 (m, 2H), 4.36 (dd,  $J = 5.6, 2.0$  Hz, 1H), 3.56 (s, 3H), 2.29–2.10 (m, 4H); **<sup>13</sup>C NMR (100 MHz, CDCl<sub>3</sub>)**  $\delta$  (ppm) = 173.7, 168.0, 146.4, 139.5, 136.6, 134.2, 130.2, 129.6, 128.6, 128.5, 128.5, 128.1, 127.6, 127.2, 127.1, 125.2, 64.9, 51.5, 34.3, 30.8; HRMS (ESI) for C<sub>24</sub>H<sub>23</sub>ClNO<sub>2</sub> [M+H]<sup>+</sup> calcd. 392.1412, found: 392.1418.

#### **Methyl 4-((diphenylmethylene)amino)-4-(perfluorophenyl)butanoate (3p)**

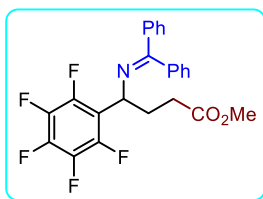

Purification by flash chromatography (petroleum ether/ Et<sub>3</sub>N = 15/1). Colorless oil; 78% yield; <sup>1</sup>H NMR (400 MHz, CDCl<sub>3</sub>) δ (ppm) = 7.67–7.64 (m, 2H), 7.46–7.44 (m, 3H), 7.40–7.37 (m, 1H), 7.34–7.30 (m, 2H), 7.03–7.00 (m, 2H), 4.91–4.85 (m, 1H), 3.58 (s, 3H), 2.43–2.23 (m, 4H); <sup>13</sup>C NMR (100 MHz, CDCl<sub>3</sub>) δ (ppm) = 173.0, 170.5, 139.1, 136.2, 130.6, 128.7 (d, *J* = 3.6 Hz), 128.7, 128.1, 127.2, 56.4, 51.6, 31.1, 30.8; HRMS (ESI) for C<sub>24</sub>H<sub>19</sub>F<sub>5</sub>NO<sub>2</sub> [M+H]<sup>+</sup> calcd. 448.1330, found: 448.1340.

#### Methyl 4-((diphenylmethylene)amino)-4-(pyridin-4-yl)butanoate (3q)

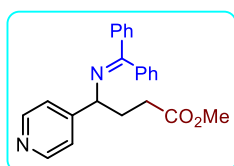

Purification by flash chromatography (petroleum ether/ Et<sub>3</sub>N = 5/1). Colorless oil, 58% yield; <sup>1</sup>H NMR (400 MHz, CDCl<sub>3</sub>) δ (ppm) = 8.52 (d, *J* = 5.6 Hz, 2H), 7.69 (d, *J* = 7.6 Hz, 2H), 7.43–7.33 (m, 6H), 7.23 (d, *J* = 5.6 Hz, 2H), 7.01–7.00 (m, 2H), 4.39 (dd, *J* = 7.6, 4.8 Hz, 1H), 3.57 (s, 3H), 2.31–2.12 (m, 4H); <sup>13</sup>C NMR (100 MHz, CDCl<sub>3</sub>) δ (ppm) = 173.5, 168.9, 153.1, 149.9, 139.3, 136.4, 130.5, 128.7, 128.6, 128.1, 127.5, 122.2, 64.2, 51.5, 33.8, 30.6; HRMS (ESI) for C<sub>23</sub>H<sub>23</sub>N<sub>2</sub>O<sub>2</sub> [M+H]<sup>+</sup> calcd. 359.1754, found: 359.1753.

#### Methyl 4-(4-(chloromethyl)phenyl)-4-((diphenylmethylene)amino)butanoate (3r)

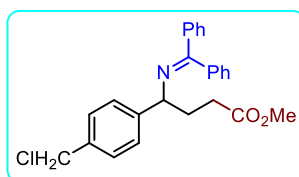

Purification by flash chromatography (petroleum ether/ Et<sub>3</sub>N = 15/1). Colorless oil; 61% yield; <sup>1</sup>H NMR (400 MHz, CDCl<sub>3</sub>) δ (ppm) = 7.67 (d, *J* = 7.2 Hz, 2H), 7.43–7.30 (m, 10H), 7.03 (d, *J* = 3.6 Hz, 2H), 4.57 (s, 2H), 4.38 (t, *J* = 7.2 Hz, 1H), 3.56 (s, 3H), 2.29–2.10 (m, 4H); <sup>13</sup>C NMR (100 MHz, CDCl<sub>3</sub>) δ (ppm) = 173.8, 167.6, 144.7, 139.6, 136.7, 136.0, 130.1, 128.7, 128.6, 128.4, 128.4, 128.1, 127.7, 127.5, 65.1, 51.5, 46.2, 34.3, 30.9; HRMS (ESI) for C<sub>25</sub>H<sub>25</sub>ClNO<sub>2</sub> [M+H]<sup>+</sup> calcd. 406.1568, found: 406.1574.

#### Methyl 4-([1,1'-biphenyl]-4-yl)-4-((diphenylmethylene)amino)butanoate (3s)

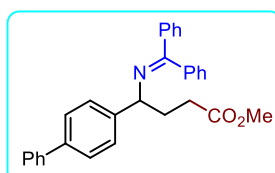

Purification by flash chromatography (petroleum ether/ Et<sub>3</sub>N

= 15/1). Colorless oil; 76% yield; **<sup>1</sup>H NMR (400 MHz, CDCl<sub>3</sub>)** δ (ppm) = 7.71–7.68 (m, 2H), 7.57 (dd, *J* = 8.4, 1.6 Hz, 2H), 7.52 (d, *J* = 8.0 Hz, 2H), 7.43–7.29 (m, 11H), 7.08–7.05 (m, 2H), 4.43 (t, *J* = 7.2 Hz, 1H), 3.56 (s, 3H), 2.33–2.16 (m, 4H); **<sup>13</sup>C NMR (100 MHz, CDCl<sub>3</sub>)** δ (ppm) = 173.9, 167.5, 143.4, 141.1, 139.8, 136.9, 130.1, 128.8, 128.6, 128.4, 128.1, 127.8, 127.5, 127.1, 127.1, 65.2, 51.5, 34.4, 31.0; HRMS (ESI) for C<sub>30</sub>H<sub>28</sub>NO<sub>2</sub> [M+H]<sup>+</sup> calcd. 434.2115, found: 434.2120.

#### *Methyl 4-((diphenylmethylene)amino)-4-(naphthalen-2-yl)butanoate (3t)*

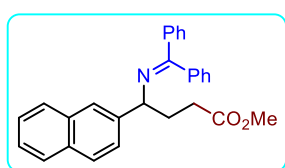

Purification by flash chromatography (petroleum ether/ Et<sub>3</sub>N = 15/1). Colorless oil; 53% yield; **<sup>1</sup>H NMR (400 MHz, CDCl<sub>3</sub>)** δ (ppm) = 7.79–7.70 (m, 5H), 7.66 (s, 1H), 7.51 (dd, *J* = 8.8, 1.6 Hz, 1H), 7.43–7.31 (m, 8H), 7.05–7.02 (m, 2H), 4.55 (t, *J* = 5.2 Hz, 1H), 3.54 (s, 3H), 2.35–2.23 (m, 4H); **<sup>13</sup>C NMR (100 MHz, CDCl<sub>3</sub>)** δ (ppm) = 173.9, 167.8, 141.9, 139.8, 136.9, 133.5, 132.7, 130.2, 128.7, 128.5, 128.4, 128.1, 127.9, 127.8, 127.7, 125.9, 125.6, 65.6, 51.5, 34.4, 31.0; HRMS (ESI) for C<sub>28</sub>H<sub>26</sub>NO<sub>2</sub> [M+H]<sup>+</sup> calcd. 408.1958, found: 408.1961.

#### *Methyl 4-(bicyclo[4.2.0]octa-1(6),2,4-trien-3-yl)-4-((diphenylmethylene)amino)butanoate (3u)*

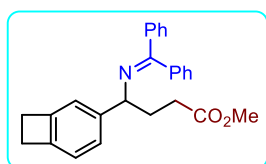

Purification by flash chromatography (petroleum ether/ Et<sub>3</sub>N = 15/1). Colorless oil; 56% yield; **<sup>1</sup>H NMR (400 MHz, CDCl<sub>3</sub>)** δ (ppm) = 7.68–7.65 (m, 2H), 7.42–7.41 (m, 3H), 7.37–7.30 (m, 3H), 7.07–7.04 (m, 4H), 6.95 (d, *J* = 8.0 Hz, 1H), 4.34–4.31 (m, 1H), 3.56 (s, 3H), 3.13 (s, 4H), 2.27–2.10 (m, 4H); **<sup>13</sup>C NMR (100 MHz, CDCl<sub>3</sub>)** δ (ppm) = 174.0, 166.9, 145.8, 144.3, 143.0, 139.8, 136.9, 129.9, 128.6, 128.3, 128.0, 127.8, 125.7, 122.3, 121.5, 66.1, 51.4, 34.7, 31.1, 29.4, 29.3; HRMS (ESI) for C<sub>26</sub>H<sub>26</sub>NO<sub>2</sub> [M+H]<sup>+</sup> calcd. 384.1958, found: 384.1960.

#### *Methyl 4-((diphenylmethylene)amino)-4-phenylpentanoate (3v)*

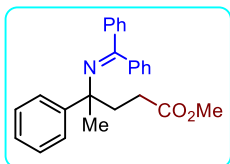

Purification by flash chromatography (petroleum ether/ Et<sub>3</sub>N = 15/1). Colorless oil, 65% yield; <sup>1</sup>H NMR (400 MHz, CDCl<sub>3</sub>) δ (ppm) = 7.61–7.59 (m, 2H), 7.38–7.29 (m, 3H), 7.20–7.08 (m, 8H), 6.66 (d, *J* = 7.2 Hz, 2H), 3.62 (s, 3H), 2.51–2.35 (m, 3H), 2.24–2.17 (m, 1H), 1.27 (s, 3H); <sup>13</sup>C NMR (100 MHz, CDCl<sub>3</sub>) δ (ppm) = 174.8, 166.4, 149.0, 141.5, 139.0, 129.8, 128.3, 127.9, 127.9, 127.9, 127.5, 127.4, 126.3, 126.1, 62.9, 51.5, 42.8, 30.1, 25.5; HRMS (ESI) for C<sub>25</sub>H<sub>26</sub>NO<sub>2</sub> [M+H]<sup>+</sup> calcd. 372.1958, found: 372.1968.

#### *Methyl 4-((diphenylmethylene)amino)-4,4-diphenylbutanoate (3w)*

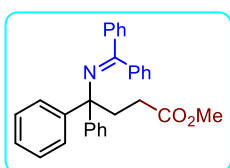

Purification by flash chromatography (petroleum ether/ Et<sub>3</sub>N = 15/1). Colorless oil, 76% yield; <sup>1</sup>H NMR (400 MHz, CDCl<sub>3</sub>): δ (ppm) 7.69 (d, *J* = 7.2 Hz, 2H), 7.38–7.28 (m, 7H), 7.17–7.08 (m, 7H), 7.03 (t, *J* = 7.6 Hz, 2H), 6.51 (d, *J* = 7.2 Hz, 2H), 3.52 (s, 3H), 2.59–2.55 (m, 2H), 2.27–2.23 (m, 2H); <sup>13</sup>C NMR (100 MHz, CDCl<sub>3</sub>): δ (ppm) 174.3, 167.2, 149.0, 141.7, 138.4, 130.0, 128.4, 128.0, 127.9, 127.8, 127.3, 127.1, 127.0, 126.0, 68.3, 51.5, 35.8, 29.2; HRMS (ESI) for C<sub>30</sub>H<sub>28</sub>NO<sub>2</sub> [M+H]<sup>+</sup> calcd. 434.2115, found: 434.2123.

#### *Methyl 3-(1-((diphenylmethylene)amino)-1,2,3,4-tetrahydronaphthalen-1-yl)propanoate (3x)*

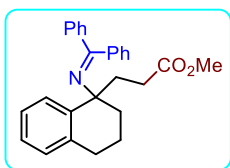

Purification by flash chromatography (petroleum ether/ Et<sub>3</sub>N = 15/1). Colorless oil, 32% yield; <sup>1</sup>H NMR (400 MHz, CDCl<sub>3</sub>) δ (ppm) = 7.55 (d, *J* = 7.2 Hz, 2H), 7.36–7.28 (m, 4H), 7.13 (t, *J* = 7.2 Hz, 1H), 7.06–6.98 (m, 4H), 6.77 (d, *J* = 7.2 Hz, 1H), 6.54 (d, *J* = 7.2 Hz, 2H), 3.69 (s, 3H), 2.98–2.90 (m, 1H), 2.66–2.44 (m, 3H), 2.26–2.19 (m, 1H), 2.04–1.96 (m, 1H), 1.86–1.84 (m, 2H), 1.72–1.64 (m, 2H); <sup>13</sup>C NMR (100 MHz, CDCl<sub>3</sub>) δ (ppm) = 175.1, 166.3, 144.8, 141.9, 138.7, 136.8, 129.7, 128.8, 128.3, 128.2, 128.0, 127.8, 127.2, 127.1, 126.0, 125.9, 62.3, 51.5, 40.4, 32.5, 30.2, 29.6, 20.2; HRMS (ESI) for C<sub>27</sub>H<sub>28</sub>NO<sub>2</sub> [M+H]<sup>+</sup> calcd. 398.2115, found: 398.2125.

#### *Methyl 3-(1-((diphenylmethylene)amino)-2,3-dihydro-1H-inden-1-yl)propanoate (3y)*

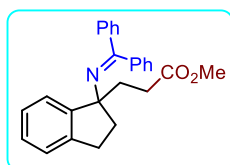

Purification by flash chromatography (petroleum ether/ Et<sub>3</sub>N = 15/1). Colorless oil, 38% yield; <sup>1</sup>H NMR (400 MHz, CDCl<sub>3</sub>) δ (ppm) = 7.61–7.59 (m, 3H), 7.35–7.26 (m, 6H), 7.22 (t, *J* = 7.2 Hz, 1H), 7.16 (td, *J* = 7.6, 1.2 Hz, 1H), 7.10–7.06 (m, 3H), 3.51 (s, 3H), 2.74–2.68 (m, 1H), 2.62–2.44 (m, 3H), 2.23–2.02 (m, 3H), 1.65–1.62 (m, 1H); <sup>13</sup>C NMR (100 MHz, CDCl<sub>3</sub>) δ (ppm) = 174.5, 165.4, 149.3, 141.7, 141.3, 139.1, 129.8, 128.3, 128.2, 127.9, 127.8, 127.8, 127.2, 126.2, 125.2, 124.6, 72.7, 51.5, 40.2, 37.8, 30.2, 29.6; HRMS (ESI) for C<sub>26</sub>H<sub>25</sub>NO<sub>2</sub> [M+Na]<sup>+</sup> calcd. 406.1778, found: 406.1781.

#### Methyl 4-((diphenylmethylene)amino)-3-methyl-4-phenylbutanoate (3z)

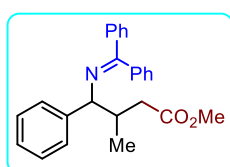

Purification by flash chromatography (petroleum ether/ Et<sub>3</sub>N = 15/1). Colorless oil, 65% yield, > 20:1 dr; <sup>1</sup>H NMR (400 MHz, CDCl<sub>3</sub>) δ (ppm) = 7.69–7.67 (m, 2H), 7.41–7.32 (m, 6H), 7.27–7.19 (m, 5H), 6.98–6.96 (m, 2H), 4.16 (dd, *J* = 34.4, 6.4 Hz, 1H), 3.55 (d, *J* = 8.8 Hz, 3H), 2.60–2.52 (m, 1H), 2.34–2.15 (m, 1H), 1.98 (dd, *J* = 15.2, 9.2 Hz, 1H), 0.96 (d, *J* = 6.8 Hz, 2H), 0.77 (d, *J* = 6.8 Hz, 1H); <sup>13</sup>C NMR (100 MHz, CDCl<sub>3</sub>) δ (ppm) = 173.6, 167.2, 143.2, 140.0, 139.9, 136.9, 130.0, 128.6, 128.3, 128.2, 128.2, 128.0, 127.8, 127.8, 126.8, 70.3, 51.3, 38.4, 38.0, 17.3, 16.2; HRMS (ESI) for C<sub>25</sub>H<sub>26</sub>NO<sub>2</sub> [M+H]<sup>+</sup> calcd. 372.1958, found: 372.1959.

#### Methyl 4-((diphenylmethylene)amino)-3,4-diphenylbutanoate (3aa)

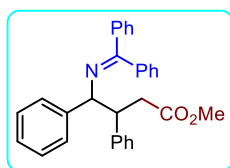

Purification by flash chromatography (petroleum ether/ Et<sub>3</sub>N = 15/1). Colorless oil; 52% yield, 5:1 dr; <sup>1</sup>H NMR (400 MHz, CDCl<sub>3</sub>) δ (ppm) = 7.71–7.68 (m, 1.7H), 7.52–7.49 (m, 0.3H), 7.39–7.28 (m, 5H), 7.24–7.20 (m, 2H), 7.19–7.15 (m, 4H), 7.15–7.12 (m, 1H), 7.12–7.08 (m, 2H), 7.05–6.96 (m, 2H), 6.64–6.57 (m, 2H), 4.45 (dd, *J* = 15.6, 6.0 Hz, 1H), 3.78–3.72 (m, 1H), 3.40 (d, *J* = 11.2 Hz, 3H), 2.98–2.87 (m, 1.7H), 2.58–2.47 (m, 0.3H); <sup>13</sup>C NMR (100 MHz, CDCl<sub>3</sub>) δ (ppm) = 173.2, 172.6, 167.8, 166.8, 142.9, 142.3, 141.6, 141.3, 139.9, 139.5, 136.7, 136.5, 130.1, 129.8, 128.9, 128.6, 128.5, 128.4, 128.2, 128.1, 128.0, 128.0, 127.9, 127.6, 127.4, 127.1, 126.7, 126.5, 126.4,

71.5, 71.1, 51.4, 50.2, 49.7, 36.9, 35.7; HRMS (ESI) for C<sub>30</sub>H<sub>28</sub>NO<sub>2</sub> [M+H]<sup>+</sup> calcd. 434.2115, found: 434.2125.

**Methyl 2-(1-((diphenylmethylene)amino)-1,2,3,4-tetrahydronaphthalen-2-yl)acetate (3ab, major diastereomer)**

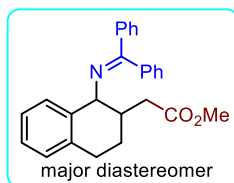

Purification by flash chromatography (petroleum ether/ Et<sub>3</sub>N = 15/1). Yellow solid; 54% yield, 2:1 dr, mp = 128.9–130.9 °C; <sup>1</sup>H NMR (400 MHz, CDCl<sub>3</sub>) δ (ppm) = 7.70–7.67 (m, 2H), 7.46–7.38 (m, 4H), 7.35–7.30 (m, 4H), 7.18–7.10 (m, 3H), 7.04–7.02 (m, 1H), 4.28 (d, *J* = 9.2 Hz, 1H), 3.57 (s, 3H), 3.05–2.97 (m, 1H), 2.87–2.81 (m, 1H), 2.64–2.55 (m, 1H), 2.45 (dd, *J* = 15.2, 5.2 Hz, 1H), 2.13–2.06 (m, 1H), 1.99 (dd, *J* = 15.2, 8.8 Hz, 1H), 1.57–1.47 (m, 1H); <sup>13</sup>C NMR (100 MHz, CDCl<sub>3</sub>) δ (ppm) = 173.2, 169.1, 139.7, 137.1, 136.6, 136.2, 130.2, 129.0, 128.9, 128.6, 128.5, 128.1, 127.7, 127.6, 126.7, 125.8, 66.0, 51.5, 45.9, 38.6, 37.9, 28.5, 26.7; HRMS (ESI) for C<sub>26</sub>H<sub>26</sub>NO<sub>2</sub> [M+H]<sup>+</sup> calcd. 384.1958, found: 384.1966.

**Methyl 2-(1-((diphenylmethylene)amino)-1,2,3,4-tetrahydronaphthalen-2-yl)acetate (3ab, minor diastereomer)**

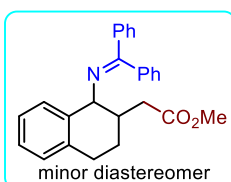

<sup>1</sup>H NMR (400 MHz, CDCl<sub>3</sub>) δ (ppm) = 7.65–7.63 (m, 2H), 7.50–7.43 (m, 3H), 7.36–7.27 (m, 5H), 7.14–7.07 (m, 3H), 6.95 (d, *J* = 7.6 Hz, 1H), 4.57 (d, *J* = 4.4 Hz, 1H), 3.57 (s, 3H), 3.03–2.95 (m, 1H), 2.84–2.76 (m, 1H), 2.71 (dd, *J* = 15.6, 6.4 Hz, 1H), 2.51–2.47 (m, 1H), 2.29 (dd, *J* = 15.6, 8.0 Hz, 1H), 2.20–2.12 (m, 1H), 1.84–1.76 (m, 1H); <sup>13</sup>C NMR (100 MHz, CDCl<sub>3</sub>) = δ (ppm) 174.0, 167.5, 139.8, 137.5, 136.9, 136.0, 130.0, 128.9, 128.7, 128.6, 128.4, 128.4, 128.0, 127.9, 126.7, 125.8, 62.4, 51.4, 36.2, 34.8, 29.7, 26.6, 25.0; HRMS (ESI) for C<sub>26</sub>H<sub>26</sub>NO<sub>2</sub> [M+H]<sup>+</sup> calcd. 384.1958, found: 384.1960.

**Methyl 2-(1-((diphenylmethylene)amino)-2,3-dihydro-1H-inden-2-yl)acetate (3ac, major diastereomer)**



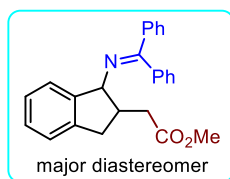

Purification by flash chromatography (petroleum ether/ Et<sub>3</sub>N = 15/1). Yellow solid, 54% yield, 2:1 dr, mp = 86.1–88.1 °C; <sup>1</sup>H NMR (400 MHz, CDCl<sub>3</sub>) δ (ppm) = 7.70–7.68 (m, 2H), 7.47–7.37 (m, 4H), 7.35–7.28 (m, 4H), 7.23–7.16 (m, 3H), 7.06–7.04 (m, 1H), 4.64 (d, *J* = 8.4 Hz, 1H), 3.62 (s, 3H), 3.28 (dd, *J* = 15.2, 7.6 Hz, 1H), 3.13–3.07 (m, 1H), 2.64–2.52 (m, 2H), 2.28 (dd, *J* = 15.2, 9.6 Hz, 1H); <sup>13</sup>C NMR (100 MHz, CDCl<sub>3</sub>): δ (ppm) 173.0, 169.7, 144.2, 142.2, 139.6, 136.8, 130.2, 128.8, 128.6, 128.5, 128.1, 127.9, 127.4, 126.5, 124.6, 123.7, 72.0, 51.6, 45.7, 37.2, 37.0; ESI-HRMS: calcd. for C<sub>25</sub>H<sub>23</sub>NO<sub>2</sub>+H<sup>+</sup>: 370.1807, found: 370.1809.

**Methyl 2-((diphenylmethylene)amino)-2,3-dihydro-1H-inden-1-yl)acetate (3ac, minor diastereomer)**

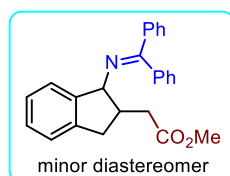

<sup>1</sup>H NMR (400 MHz, CDCl<sub>3</sub>) δ (ppm) = 7.65–7.63 (m, 2H), 7.51–7.43 (m, 3H), 7.36–7.29 (m, 5H), 7.23–7.13 (m, 3H), 7.04 (d, *J* = 7.2 Hz, 1H), 4.91 (d, *J* = 6.4 Hz, 1H), 3.53 (s, 3H), 3.09 (dd, *J* = 10.8, 6.8 Hz, 1H), 3.02–2.91 (m, 2H), 2.81 (dd, *J* = 16.0, 8.8 Hz, 1H), 2.41 (dd, *J* = 16.0, 8.8 Hz, 1H); <sup>13</sup>C NMR (100 MHz, CDCl<sub>3</sub>) δ (ppm) = 174.0, 168.1, 144.3, 142.5, 139.7, 136.9, 130.0, 128.7, 128.6, 128.4, 128.0, 127.4, 126.4, 124.8, 124.4, 67.9, 51.4, 42.7, 37.4, 35.0; ESI-HRMS: calcd. for C<sub>25</sub>H<sub>23</sub>NO<sub>2</sub>+H<sup>+</sup>: 370.1807, found: 370.1811.

**Methyl 4-((diphenylmethylene)amino)-5-phenylpentanoate (3ad)**

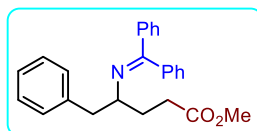

Purification by flash chromatography (petroleum ether/ Et<sub>3</sub>N = 15/1). Colorless oil, 47% yield; <sup>1</sup>H NMR (400 MHz, CDCl<sub>3</sub>) δ (ppm) = 7.56 (d, *J* = 7.6 Hz, 2H), 7.36–7.27 (m, 5H), 7.24 (s, 1H), 7.19–7.14 (m, 3H), 6.99 (d, *J* = 7.6 Hz, 2H), 6.51 (d, *J* = 6.4 Hz, 2H), 3.57 (s, 3H), 3.50–3.43 (m, 1H), 2.93–2.80 (m, 2H), 2.38–2.19 (m, 2H), 2.08–1.90 (m, 2H); <sup>13</sup>C NMR (100 MHz, CDCl<sub>3</sub>) δ (ppm) = 174.0, 167.8, 139.7, 139.2, 137.0, 129.9, 129.8, 128.4, 128.2, 128.1, 128.0, 127.9, 127.5, 126.0, 63.2, 51.5, 43.1, 31.4, 31.3; HRMS (ESI) for C<sub>25</sub>H<sub>26</sub>NO<sub>2</sub> [M+H]<sup>+</sup> calcd. 372.1958, found: 372.1955.



388.1907, found: 388.1910.

***Dimethyl 4-((diphenylmethylene)amino)tridecanedioate (3ah)***

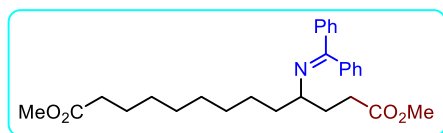

Purification by flash chromatography (petroleum ether/ Et<sub>3</sub>N = 15/1). Colorless oil, 34% yield; <sup>1</sup>H NMR (400 MHz, CDCl<sub>3</sub>) δ (ppm) = 7.61–7.58

(m, 2H), 7.46–7.40 (m, 3H), 7.36–7.29 (m, 3H), 7.14–7.11 (m, 2H), 3.66 (s, 3H), 3.58 (s, 3H), 3.32–3.25 (m, 1H), 2.31–2.21 (m, 4H), 1.92–1.87 (m, 2H), 1.73 (d, *J* = 6.4 Hz, 1H), 1.62–1.53 (m, 4H), 1.26–1.21 (m, 9H); <sup>13</sup>C NMR (100 MHz, CDCl<sub>3</sub>) δ (ppm) = 174.3, 174.2, 167.0, 140.0, 137.3, 129.8, 128.4, 128.3, 128.1, 128.0, 127.9, 61.0, 51.4, 36.3, 34.1, 31.3, 31.1, 29.7, 29.4, 29.2, 29.1, 26.3, 24.9; HRMS (ESI) for C<sub>28</sub>H<sub>38</sub>NO<sub>4</sub> [M+H]<sup>+</sup> calcd. 452.2795, found: 452.2800.

***5-Methyl 1-((1R,2R,4R)-1,7,7-trimethylbicyclo[2.2.1]heptan-2-yl) 2-((diphenylmethylene)amino)-2-methylpentanedioate (3ai)***

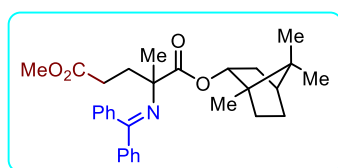

Purification by flash chromatography (petroleum ether/ Et<sub>3</sub>N = 15/1). Colorless oil, 41% yield; <sup>1</sup>H NMR (400 MHz, CDCl<sub>3</sub>) δ (ppm) = 7.55–7.53 (m, 2H), 7.38–7.34

(m, 4H), 7.29 (d, *J* = 7.6 Hz, 2H), 7.18–7.15 (m, 2H), 4.33–4.20 (m, 1H), 3.65 (s, 3H), 2.68–2.64 (m, 2H), 2.29–2.13 (m, 2H), 1.76–1.71 (m, 1H), 1.64–1.46 (m, 4H), 1.26 (d, *J* = 3.2 Hz, 3H), 1.09–1.02 (m, 2H), 0.92–0.88 (m, 2H), 0.79 (d, *J* = 10.4 Hz, 6H), 0.64 (s, 1H); <sup>13</sup>C NMR (100 MHz, CDCl<sub>3</sub>) δ (ppm) = 174.4, 174.4, 173.7, 173.6, 167.6, 167.6, 141.0, 137.8, 130.0, 128.7, 128.7, 128.5, 128.3, 127.9, 127.8, 127.8, 81.5, 81.3, 65.3, 65.2, 51.6, 48.7, 48.7, 46.9, 44.9, 38.9, 38.7, 38.3, 37.8, 33.7, 33.7, 29.5, 29.4, 27.0, 24.4, 20.0, 19.9, 19.8, 11.6, 11.5; HRMS (ESI) for C<sub>30</sub>H<sub>38</sub>NO<sub>4</sub> [M+H]<sup>+</sup> calcd. 476.2795, found: 476.2804.

***Methyl 2-(5-((diphenylmethylene)amino)-3-hydroxy-10,13-dimethyl-17-(6-methylheptan-2-yl)hexadecahydro-1H-cyclopenta[a]phenanthren-6-yl)acetate (3aj)***

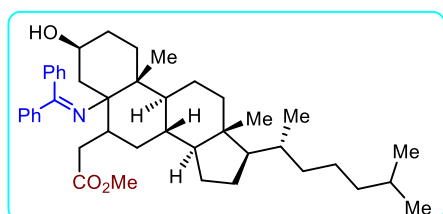

Purification by flash chromatography (petroleum

ether/ Et<sub>3</sub>N = 3/1). Yellow oil, 21% yield; <sup>1</sup>H NMR (400 MHz, CDCl<sub>3</sub>) δ (ppm) = 7.54–7.52 (m, 2H), 7.47–7.41 (m, 3H), 7.35–7.31 (m, 3H), 7.22–7.02 (m, 2H), 3.82–3.75 (m, 1H), 3.67 (d, *J* = 10.4 Hz, 1H), 3.51 (s, 3H), 3.39 (q, *J* = 7.2 Hz, 1H), 2.59–2.56 (m, 1H), 2.38–2.26 (m, 3H), 2.08–2.00 (m, 3H), 1.82–1.77 (m, 2H), 1.70 (dd, *J* = 12.8, 3.6 Hz, 1H), 1.62 (s, 1H), 1.56–1.57 (m, 1H), 1.55 (d, *J* = 2.0 Hz, 1H), 1.53–1.49 (m, 3H), 1.47–1.46 (m, 2H), 1.43 (s, 1H), 1.34–1.31 (m, 6H), 1.26 (s, 1H), 1.21 (s, 1H), 1.16 (s, 1H), 1.13–1.10 (m, 5H), 1.06 (s, 2H), 0.93 (d, *J* = 6.4 Hz, 3H), 0.86 (dd, *J* = 6.8, 1.6 Hz, 6H), 0.70 (s, 1H); <sup>13</sup>C NMR (100 MHz, CDCl<sub>3</sub>) δ (ppm) = 173.8, 161.3, 142.3, 139.3, 129.4, 128.1, 128.0, 128.0, 128.0, 68.0, 67.2, 58.5, 56.2, 56.0, 51.5, 46.4, 42.8, 41.1, 40.4, 39.5, 38.2, 38.0, 36.2, 35.8, 35.7, 33.9, 31.2, 30.5, 28.2, 28.0, 24.2, 23.8, 22.8, 22.6, 21.5, 18.7, 18.5, 12.4, 8.3; HRMS (ESI) for C<sub>43</sub>H<sub>62</sub>NO<sub>3</sub> [M+H]<sup>+</sup> calcd. 640.4724, found: 640.4728.

***(3R,10S,13R)-10,13-Dimethyl-17-((S)-6-methylheptan-2-yl)hexadecahydro-1H-cyclo-penta[a]phenanthren-3-yl 3-(1-((diphenylmethylene)amino)-4-methoxy-4-oxobuty-1)benzoate (3ak)***

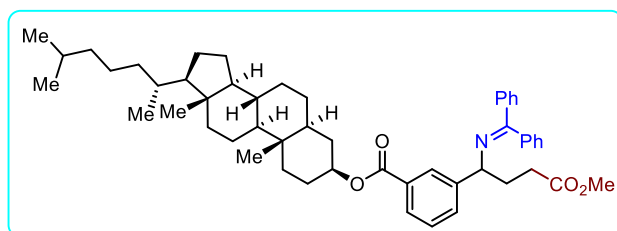

Purification by flash chromatography (petroleum ether/ Et<sub>3</sub>N = 15/1). Colorless oil, 56% yield; <sup>1</sup>H NMR (400 MHz, CDCl<sub>3</sub>)

δ (ppm) = 7.89 (dd, *J* = 8, 5.2 Hz, 2H), 7.69–7.67 (m 2H), 7.54–7.52 (m, 1H), 7.42–7.30 (m, 7H), 7.02 (dd, *J* = 5.6, 2.0 Hz, 2H), 4.97–4.89 (m, 1H), 4.44 (t, *J* = 7.2 Hz, 1H), 3.56 (s, 3H), 2.53 (q, *J* = 7.2 Hz, 1H), 2.30–2.14 (m, 4H), 2.00–1.93 (m, 2H), 1.83–1.50 (m, 10H), 1.37–1.23 (m, 10H), 1.15–1.08 (m, 5H), 1.50–1.01 (m, 4H), 0.91 (d, *J* = 6.4 Hz, 3H), 0.88–0.87 (m, 5H), 0.86 (d, *J* = 1.6 Hz, 2H), 0.72–0.69 (m, 1H), 0.66 (s, 3H); <sup>13</sup>C NMR (100 MHz, CDCl<sub>3</sub>) δ (ppm) = 173.7, 167.9, 166.2, 144.6, 139.6, 136.7, 131.5, 131.0, 130.2, 128.6, 128.5, 128.4, 128.3, 128.1, 128.1, 127.6, 74.4, 65.1, 56.5, 56.3, 54.3, 51.5, 46.2, 44.8, 42.6, 40.0, 39.6, 36.9, 36.2, 35.8, 35.6, 35.5, 35.4, 34.3, 34.2, 34.2, 32.1, 30.9, 28.7, 28.3, 28.0, 27.6, 27.6, 24.3, 23.9, 22.9, 22.6, 21.3, 18.7, 12.4, 12.1, 11.4; HRMS (ESI) for C<sub>52</sub>H<sub>70</sub>NO<sub>4</sub> [M+H]<sup>+</sup> calcd.

772.5299, found: 772.5300.

***(1S,2S,5R)-2-Isopropyl-5-methylcyclohexyl 3-(1-((diphenylmethylene)amino)-4-methoxy-4-oxobutyl)benzoate (3al)***

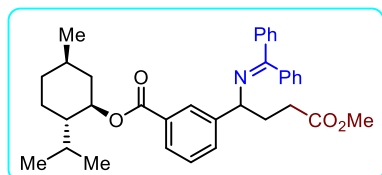

Purification by flash chromatography (petroleum ether/ Et<sub>3</sub>N = 15/1). Colorless oil, 32% yield; <sup>1</sup>H NMR (400 MHz, CDCl<sub>3</sub>) δ (ppm) = 7.96–7.88 (m, 2H), 7.69–7.67 (m, 2H), 7.59–7.47 (m, 1H), 7.43–7.31 (m, 7H), 7.03–7.02 (m, 2H), 4.95–4.88 (m, 1H), 4.46–4.43 (m, 1H), 3.57 (s, 3H), 2.32–2.11 (m, 5H), 1.99–1.93 (m, 1H), 1.73 (d, *J* = 11.2 Hz, 2H), 1.54 (d, *J* = 12 Hz, 1H), 1.16–1.08 (m, 2H), 0.94–0.89 (m, 7H), 0.85–0.83 (m, 1H), 0.79 (t, *J* = 7.2 Hz, 3H); <sup>13</sup>C NMR (100 MHz, CDCl<sub>3</sub>) δ (ppm) = 173.7, 167.8, 166.2, 166.1, 144.6, 144.6, 139.5, 136.7, 136.7, 131.6, 131.5, 131.0, 130.9, 130.2, 128.6, 128.6, 128.5, 128.4, 128.3, 128.2, 128.2, 128.1, 128.1, 127.6, 127.6, 74.9, 74.8, 65.2, 65.0, 51.5, 47.2, 41.0, 41.0, 34.4, 34.4, 34.3, 34.2, 31.5, 30.9, 30.9, 26.6, 26.5, 23.8, 23.7, 22.1, 20.8, 20.7, 16.6, 16.6; HRMS (ESI) for C<sub>35</sub>H<sub>42</sub>NO<sub>4</sub> [M+H]<sup>+</sup> calcd. 540.3108, found: 540.3115.

***Methyl 4-((bis(4-fluorophenyl)methylene)amino)-4-phenylbutanoate (3am)***

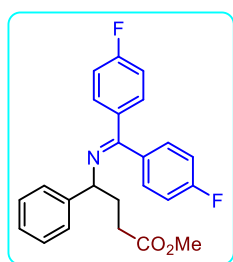

Purification by flash chromatography (petroleum ether/ Et<sub>3</sub>N = 15/1). Colorless oil, 69% yield; <sup>1</sup>H NMR (400 MHz, CDCl<sub>3</sub>) δ (ppm) = 7.66–7.63 (m, 2H), 7.31–7.22 (m, 5H), 7.12 (t, *J* = 7.6 Hz, 2H), 7.01 (t, *J* = 8.0 Hz, 4H), 4.33 (d, *J* = 6.8 Hz, 1H), 3.56 (s, 3H), 2.26–2.12 (m, 4H); <sup>13</sup>C NMR (100 MHz, CDCl<sub>3</sub>) δ (ppm) = 173.8, 164.6 (d, *J* = 154.0 Hz), 165.3, 162.2 (d, *J* = 151.8 Hz), 144.0, 135.8 (d, *J* = 3.0 Hz), 132.4 (d, *J* = 3.6 Hz), 130.5 (d, *J* = 8.6 Hz), 129.6 (d, *J* = 8.1 Hz), 128.5, 127.0, 115.6 (d, *J* = 21.3 Hz), 115.0 (d, *J* = 21.6 Hz), 65.6, 51.5, 34.4, 30.9; HRMS (ESI) for C<sub>24</sub>H<sub>22</sub>F<sub>2</sub>NO<sub>2</sub> [M+H]<sup>+</sup> calcd. 394.1613, found: 394.1619.

***Methyl 4-((di-p-tolylmethylene)amino)-4-phenylbutanoate (3an)***

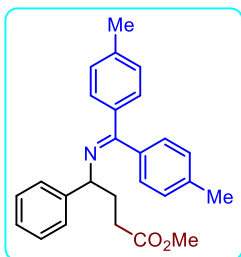

Purification by flash chromatography (petroleum ether/ Et<sub>3</sub>N = 15/1). Colorless oil, 68% yield; <sup>1</sup>H NMR (400 MHz, CDCl<sub>3</sub>) δ (ppm) = 7.56 (d, *J* = 8.0 Hz, 2H), 7.30 (t, *J* = 6.8 Hz, 4H), 7.20 (d, *J* = 7.6 Hz, 3H), 7.12 (d, *J* = 8.0 Hz, 2H), 6.91 (d, *J* = 7.6 Hz, 2H), 4.40–4.37 (m, 1H), 3.56 (s, 3H), 2.41 (s, 3H), 2.35 (s, 3H), 2.29–2.13 (m, 4H); <sup>13</sup>C NMR (100 MHz, CDCl<sub>3</sub>) δ (ppm) = 174.0, 167.4, 144.6, 140.1, 138.0, 137.4, 134.0, 128.9, 128.7, 128.6, 128.3, 127.7, 127.1, 126.7, 65.3, 51.4, 34.4, 31.0, 21.4, 21.3; HRMS (ESI) for C<sub>26</sub>H<sub>28</sub>NO<sub>2</sub> [M+H]<sup>+</sup> calcd. 386.2115, found: 386.2118.

#### *Methyl 4-((bis(4-methoxyphenyl)methylene)amino)-4-phenylbutanoate (3ao)*

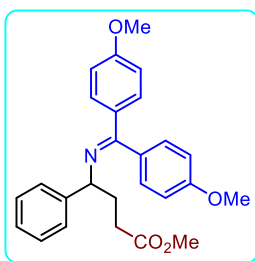

Purification by flash chromatography (petroleum ether/ Et<sub>3</sub>N = 15/1). Colorless oil, 71% yield; <sup>1</sup>H NMR (400 MHz, CDCl<sub>3</sub>) δ (ppm) = 7.64–7.61 (m, 2H), 7.32–7.26 (m, 4H), 7.22–7.17 (m, 1H), 6.93 (q, *J* = 7.2 Hz, 4H), 6.85–6.82 (m, 2H), 4.39 (dd, *J* = 7.6, 5.6 Hz, 1H), 3.85 (s, 3H), 3.80 (s, 3H), 3.56 (s, 3H), 2.31–2.10 (m, 4H); <sup>13</sup>C NMR (100 MHz, CDCl<sub>3</sub>) δ (ppm) = 174.0, 166.6, 161.2, 159.4, 144.7, 133.1, 130.2, 129.2, 129.2, 128.3, 127.1, 126.7, 113.7, 113.3, 65.2, 55.4, 55.3, 51.4, 34.5, 31.1; HRMS (ESI) for C<sub>26</sub>H<sub>28</sub>NO<sub>4</sub> [M+H]<sup>+</sup> calcd. 418.2013, found: 418.2021.

#### *5-(p-Tolyl)pyrrolidin-2-one (4a)*

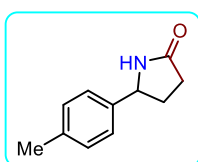

Purification by flash chromatography (ethyl acetate/Et<sub>3</sub>N = 50/1). White solid, 34% yield, mp = 108.9–110.9 °C; <sup>1</sup>H NMR (400 MHz, CDCl<sub>3</sub>) δ (ppm) = 7.19–7.15 (m, 4H), 6.72 (s, 1H), 4.70 (t, *J* = 7.2 Hz, 1H), 2.57–2.48 (m, 1H), 2.44–2.35 (m, 2H), 2.33 (s, 3H), 1.97–1.90 (m, 1H); <sup>13</sup>C NMR (100 MHz, CDCl<sub>3</sub>) δ (ppm) = 178.7, 139.6, 137.6, 129.5, 125.6, 58.0, 31.4, 30.4, 21.1; HRMS (ESI) for C<sub>11</sub>H<sub>14</sub>NO [M+H]<sup>+</sup> calcd. 176.1070, found: 176.1076.

#### *5-(m-Tolyl)pyrrolidin-2-one (4b)*

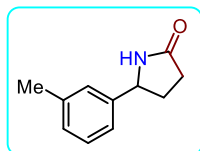

Purification by flash chromatography (ethyl acetate/Et<sub>3</sub>N = 50/1).

White solid, 54% yield, mp = 121.0–123.0 °C; <sup>1</sup>H NMR (400 MHz,

CDCl<sub>3</sub>) δ (ppm) = 7.32 (d, *J* = 7.2 Hz, 1H), 7.23–7.18 (m, 2H),

7.17–7.13 (m, 2H), 4.96 (dd, *J* = 7.6, 6.0 Hz, 1H), 2.60–2.53 (m, 1H), 2.45–2.34 (m, 2H), 2.32 (s, 3H), 1.86–1.78 (m, 1H); <sup>13</sup>C NMR (100 MHz, CDCl<sub>3</sub>) δ (ppm) = 179.2, 140.7, 134.4, 130.7, 127.3, 126.5, 124.0, 54.8, 30.0, 29.4, 19.0; HRMS (ESI) for C<sub>11</sub>H<sub>14</sub>NO [M+H]<sup>+</sup> calcd. 176.1070, found: 176.1076.

#### 5-(*o*-Tolyl)pyrrolidin-2-one (4c)

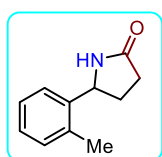

Purification by flash chromatography (ethyl acetate/Et<sub>3</sub>N = 50/1).

White solid, 39% yield, mp = 101.9–103.9 °C; <sup>1</sup>H NMR (400 MHz,

CDCl<sub>3</sub>) δ (ppm) = 7.34–7.32 (m, 1H), 7.24–7.14 (m, 3H), 6.97 (s, 1H),

4.97 (dd, *J* = 7.6, 6.0 Hz, 1H), 2.64–2.55 (m, 1H), 2.46–2.36 (m, 2H), 2.33 (s, 3H), 1.88–1.79 (m, 1H); <sup>13</sup>C NMR (100 MHz, CDCl<sub>3</sub>) δ (ppm) = 179.01, 140.6, 134.4, 130.7, 127.4, 126.6, 124.0, 54.7, 29.9, 29.5, 19.0; HRMS (ESI) for C<sub>11</sub>H<sub>14</sub>NO [M+H]<sup>+</sup> calcd. 176.1070, found: 176.1075.

#### 5-(4-Methoxyphenyl)pyrrolidin-2-one (4d)

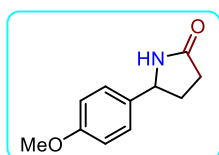

Purification by flash chromatography (ethyl acetate/Et<sub>3</sub>N = 50/1).

White solid, 51% yield, mp = 122.3–124.3 °C; <sup>1</sup>H NMR (400

MHz, CDCl<sub>3</sub>) δ (ppm) = 7.22–7.19 (m, 2H), 6.93 (s, 1H), 6.90–

6.86 (m, 2H), 4.69 (t, *J* = 6.8 Hz, 1H), 3.79 (s, 3H), 2.53–2.35 (m, 3H), 1.96–1.89 (m, 1H); <sup>13</sup>C NMR (100 MHz, CDCl<sub>3</sub>) δ (ppm) = 178.7, 159.2, 134.6, 126.9, 114.2, 57.7, 55.3, 31.4, 30.5; HRMS (ESI) for C<sub>11</sub>H<sub>14</sub>NO<sub>2</sub> [M+H]<sup>+</sup> calcd. 192.1019, found: 192.1026.

#### 5-(4-(*tert*-Butyl)phenyl)pyrrolidin-2-one (4e)

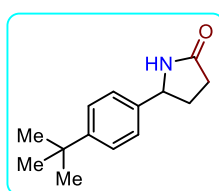

Purification by flash chromatography (ethyl acetate/Et<sub>3</sub>N = 50/1).

White solid, 66% yield, mp = 155.9–157.9 °C; <sup>1</sup>H NMR (400

MHz, CDCl<sub>3</sub>) δ (ppm) = 7.40–7.38 (m, 2H), 7.23 (d, *J* = 8.0 Hz,

2H), 7.02 (s, 1H), 4.73 (t,  $J = 6.8$  Hz, 1H), 2.54–2.37 (m, 3H), 2.00–1.93 (m, 1H), 1.32 (s, 9H);  $^{13}\text{C}$  NMR (100 MHz,  $\text{CDCl}_3$ ):  $\delta$  (ppm) = 178.8, 150.8, 139.5, 125.8, 125.4, 57.9, 34.5, 31.3, 31.3, 30.5; HRMS (ESI) for  $\text{C}_{14}\text{H}_{20}\text{NO}$   $[\text{M}+\text{H}]^+$  calcd. 218.1539, found: 218.1548.

#### 5-(4-Chlorophenyl)pyrrolidin-2-one (4f)

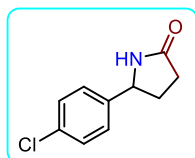

Purification by flash chromatography (ethyl acetate/ $\text{Et}_3\text{N} = 50/1$ ).

White solid, 36% yield, mp = 107.5–109.5 °C;  $^1\text{H}$  NMR (400 MHz,

$\text{CDCl}_3$ )  $\delta$  (ppm) = 7.34–7.31 (m, 3H), 7.24–7.21 (m, 2H), 4.73 (t,  $J = 7.2$  Hz, 1H), 2.59–2.51 (m, 1H), 2.44–2.33 (m, 2H), 1.94–1.85 (m, 1H);  $^{13}\text{C}$  NMR (100 MHz,  $\text{CDCl}_3$ )  $\delta$  (ppm) = 179.0, 141.1, 133.5, 129.0, 127.0, 57.6, 31.2, 30.3; HRMS (ESI) for  $\text{C}_{10}\text{H}_{11}\text{ClNO}$   $[\text{M}+\text{H}]^+$  calcd. 196.0524, found: 196.0532.

#### 5-(3-Chlorophenyl)pyrrolidin-2-one (4g)

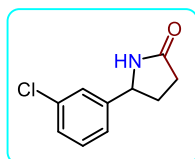

Purification by flash chromatography (ethyl acetate/ $\text{Et}_3\text{N} = 50/1$ ).

white solid, 52% yield, mp = 117.0–119.0 °C;  $^1\text{H}$  NMR (400 MHz,

$\text{CDCl}_3$ )  $\delta$  (ppm) = 7.54 (s, 1H), 7.31–7.23 (m, 3H), 7.19–7.16 (m, 1H), 4.72 (t,  $J = 6.8$  Hz, 1H), 2.59–2.50 (m, 1H), 2.46–2.31 (m, 2H), 1.95–1.86 (m, 1H);  $^{13}\text{C}$  NMR (100 MHz,  $\text{CDCl}_3$ )  $\delta$  (ppm) = 179.1, 144.9, 134.7, 130.2, 127.9, 125.8, 123.8, 57.6, 31.0, 30.2; HRMS (ESI) for  $\text{C}_{10}\text{H}_{11}\text{ClNO}$   $[\text{M}+\text{H}]^+$  calcd. 196.0524, found: 196.0532.

#### 5-(4-(Chloromethyl)phenyl)pyrrolidin-2-one (4h)

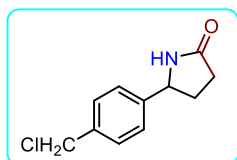

Purification by flash chromatography (ethyl acetate/ $\text{Et}_3\text{N} = 50/1$ ).

white solid, 50% yield, mp = 148.7–150.7 °C;  $^1\text{H}$  NMR (400

MHz,  $\text{CDCl}_3$ )  $\delta$  (ppm) = 7.39 (d,  $J = 8.0$  Hz, 2H), 7.30–7.28 (m, 2H), 7.18 (s, 1H), 4.75 (t,  $J = 7.2$  Hz, 1H), 4.57 (s, 2H), 2.59–2.50 (m, 1H), 2.47–2.33 (m, 2H), 1.96–1.87 (m, 1H);  $^{13}\text{C}$  NMR (100 MHz,  $\text{CDCl}_3$ )  $\delta$  (ppm) = 179.0, 143.0, 137.1, 129.1, 126.0, 57.8, 45.8, 31.2, 30.3; HRMS (ESI) for  $\text{C}_{11}\text{H}_{13}\text{ClNO}$   $[\text{M}+\text{H}]^+$  calcd. 210.0680, found: 210.0692.



### 5-Tridecylpyrrolidin-2-one (4i)

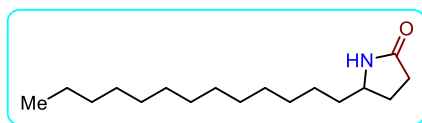

Purification by flash chromatography (ethyl acetate/Et<sub>3</sub>N = 50/1). White solid, 24% yield, mp

= 72.9–74.9 °C; <sup>1</sup>H NMR (400 MHz, CDCl<sub>3</sub>): δ

(ppm) = 6.41 (d, *J* = 26.4 Hz, 1H), 3.66–3.59 (m, 1H), 2.39–2.20 (m, 3H), 2.05–1.99 (m, 1H), 1.75–1.65 (m, 1H), 1.56–1.37 (m, 3H), 1.30–1.26 (m, 20H), 0.88 (t, *J* = 6.8 Hz, 3H); <sup>13</sup>C NMR (100 MHz, CDCl<sub>3</sub>) δ (ppm) = 178.3, 54.6, 36.8, 31.9, 30.2, 29.7, 29.7, 29.6, 29.6, 29.5, 29.4, 27.3, 25.9, 22.7, 14.1; HRMS (ESI) for C<sub>17</sub>H<sub>34</sub>NO [M+H]<sup>+</sup> calcd. 268.2635, found: 268.2644.

### Methyl 2-(2-amino-2-phenylcyclohexyl)acetate (5a)

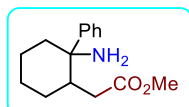

Purification by flash chromatography (ethyl acetate/Et<sub>3</sub>N = 50/1).

Colorless oil, 38% yield, 7:1 dr; <sup>1</sup>H NMR (400 MHz, CDCl<sub>3</sub>) δ

(ppm) 7.46 (d, *J* = 8.0 Hz, 2H), 7.33 (t, *J* = 7.6 Hz, 2H), 7.22 (t, *J* = 7.2 Hz, 1H), 3.52 (s, 3H), 2.48–2.45 (m, 1H), 2.27–2.20 (m, 1H), 2.18–1.97 (m, 5H), 1.86 (dd, *J* = 15.2, 3.2 Hz, 1H), 1.78–1.70 (m, 3H), 1.57–1.50 (m, 2H); <sup>13</sup>C NMR (100 MHz, CDCl<sub>3</sub>) δ (ppm) = 173.6, 148.4, 128.4, 126.7, 125.6, 55.7, 51.4, 42.0, 34.6, 32.5, 25.3, 21.5, 20.0; HRMS (ESI) for C<sub>15</sub>H<sub>21</sub>NO<sub>2</sub>Na [M+Na]<sup>+</sup> calcd. 270.1465, found: 270.1470.

### 3-Carboxy-1-(p-tolyl)propan-1-aminium chloride (6b)

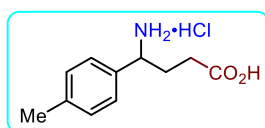

Yellow solid, 70% yield, mp = 262.9–264.9 °C; <sup>1</sup>H NMR (400

MHz, D<sub>2</sub>O) δ (ppm) = 7.20–7.15 (m, 4H), 4.24–4.21 (m, 1H),

2.21–2.06 (m, 7H); <sup>13</sup>C NMR (100 MHz, D<sub>2</sub>O) δ (ppm) =

176.5, 139.9, 132.0, 129.9, 127.3, 54.4, 29.9, 28.4, 20.3; ESI-HRMS: calcd. for C<sub>11</sub>H<sub>14</sub>NO<sub>2</sub><sup>-</sup>: 192.1025, found: 192.1026.

## 6. References

1 T. Patra, M. Das, C. G. Daniliuc, F. Glorius, *Nat. Catal.* **2021**, *4*, 54–61.

## 7. NMR spectra of compounds

### Methyl 4-((diphenylmethylene)amino)-4-phenylbutanoate (3a)

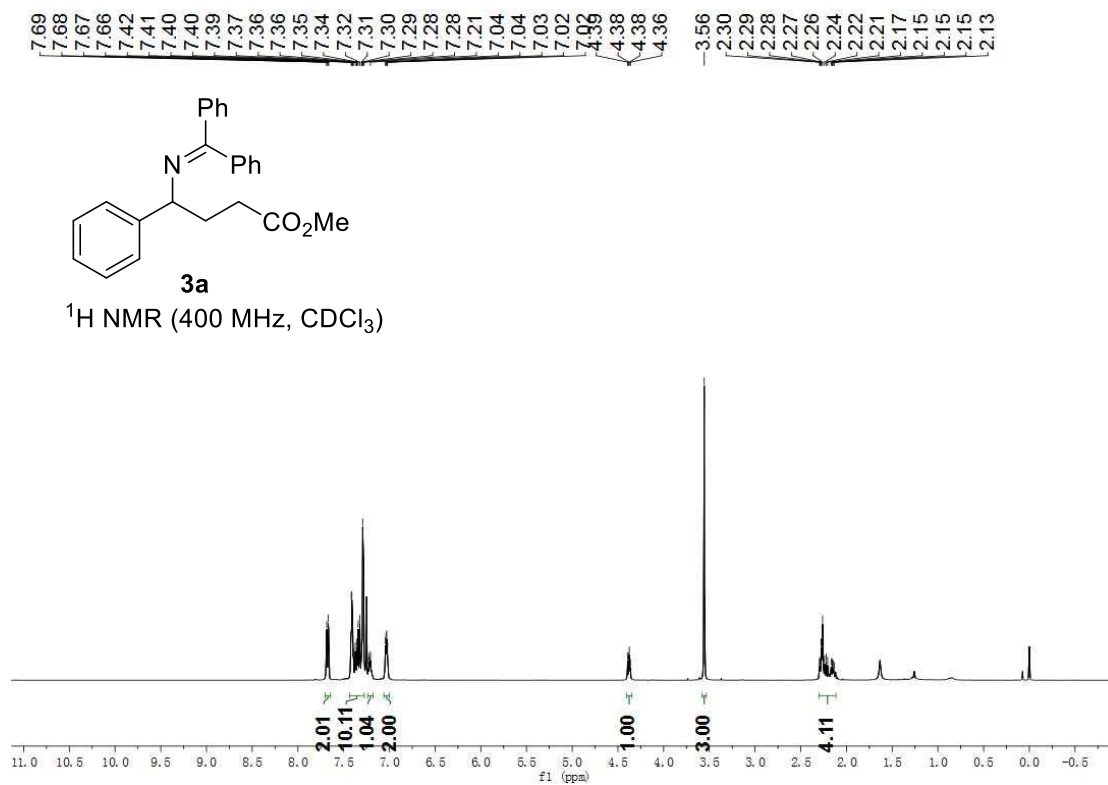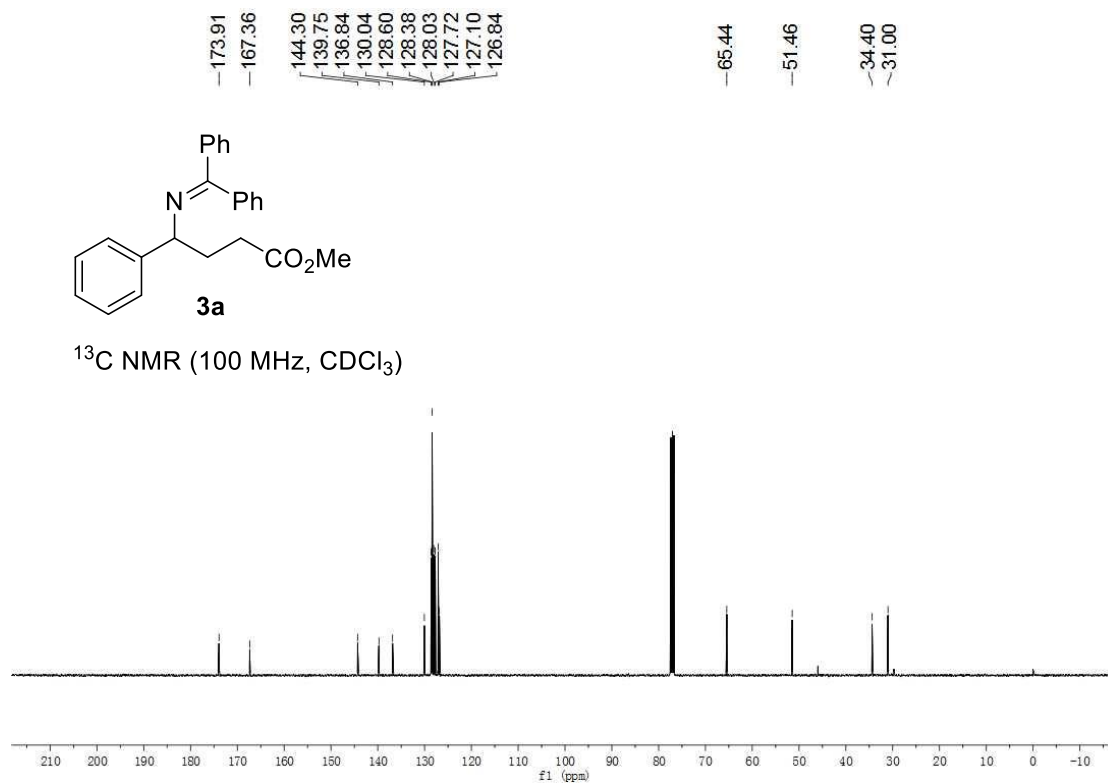

**Methyl 4-((diphenylmethylene)amino)-4-(p-tolyl)butanoate (3b)**

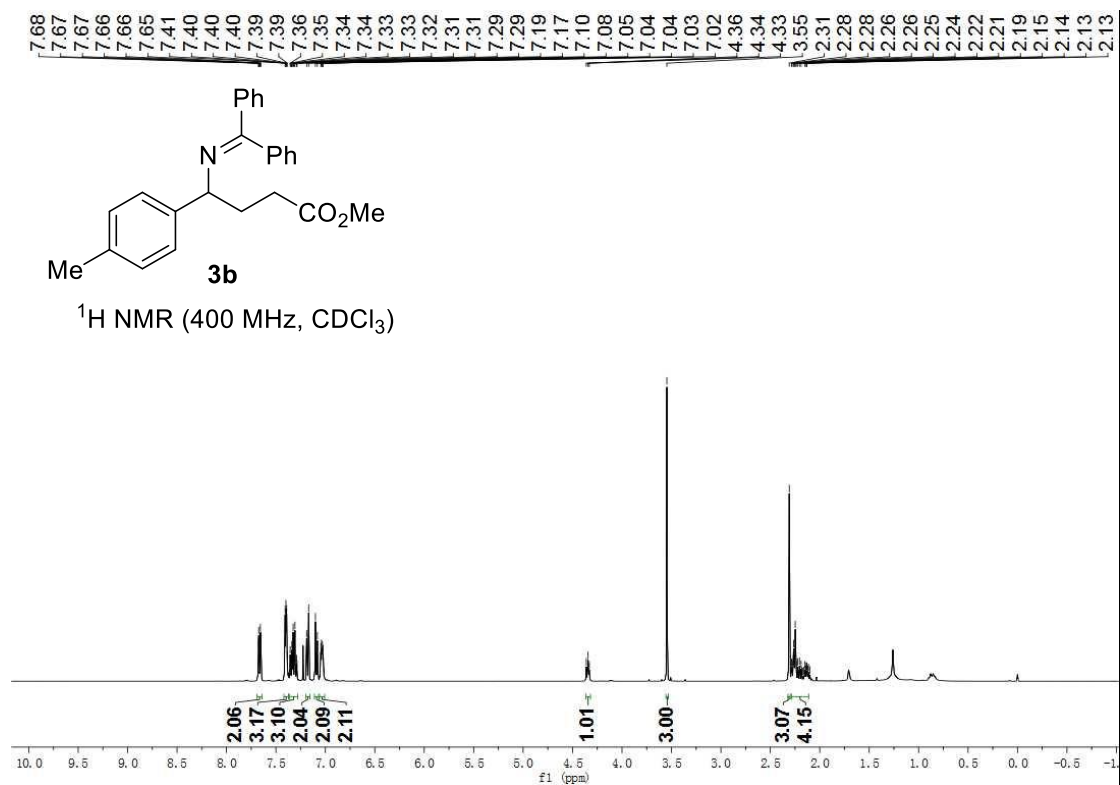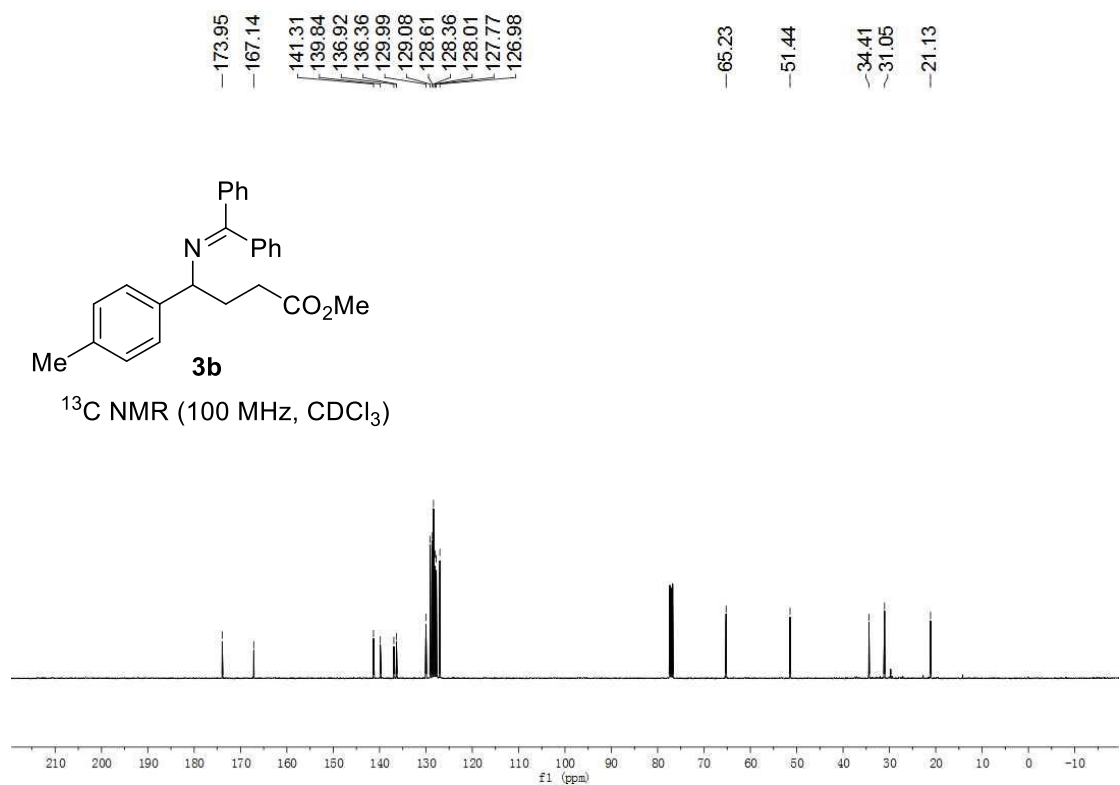

*Methyl 4-((diphenylmethylene)amino)-4-(4-methoxyphenyl)butanoate (3c)*

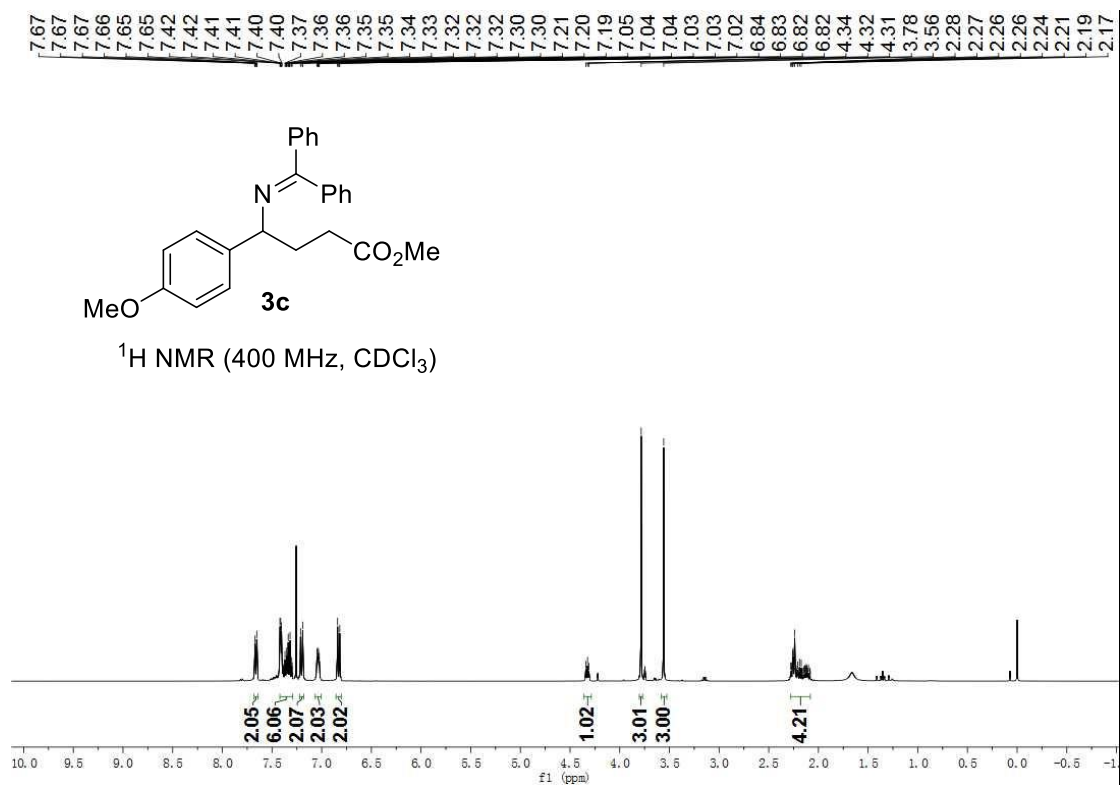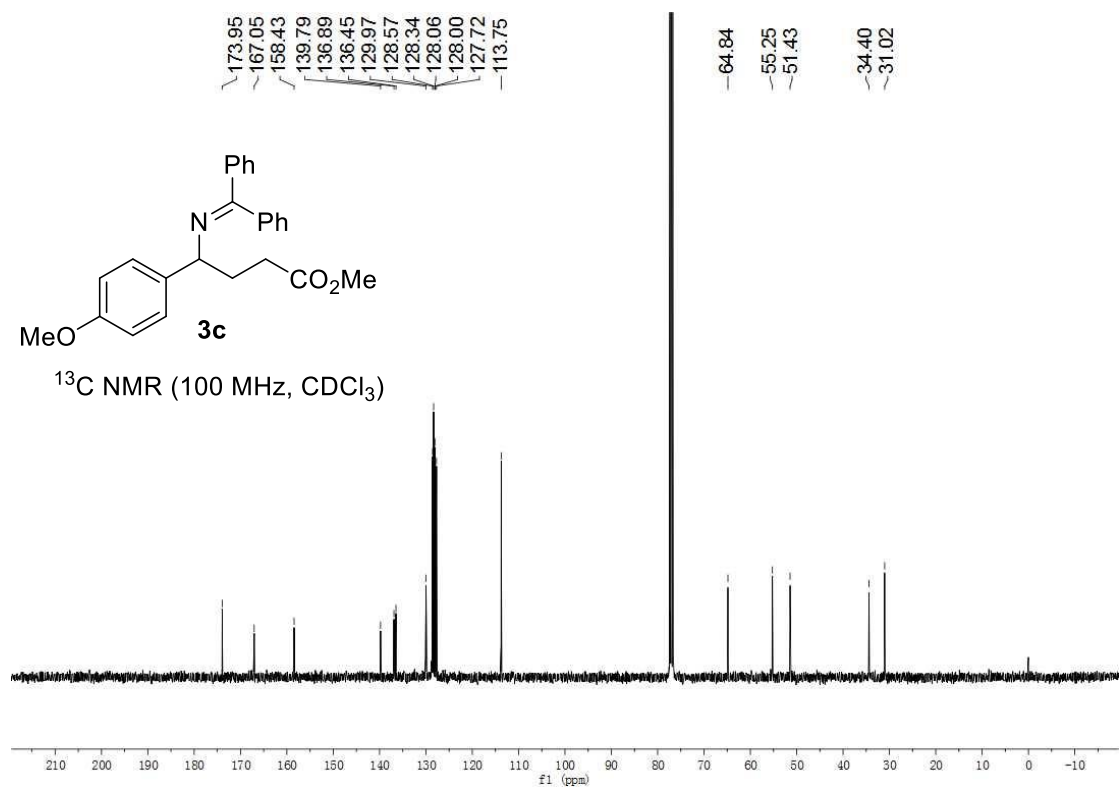

*Methyl 4-(4-(tert-butyl)phenyl)-4-((diphenylmethylene)amino)butanoate (3d)*

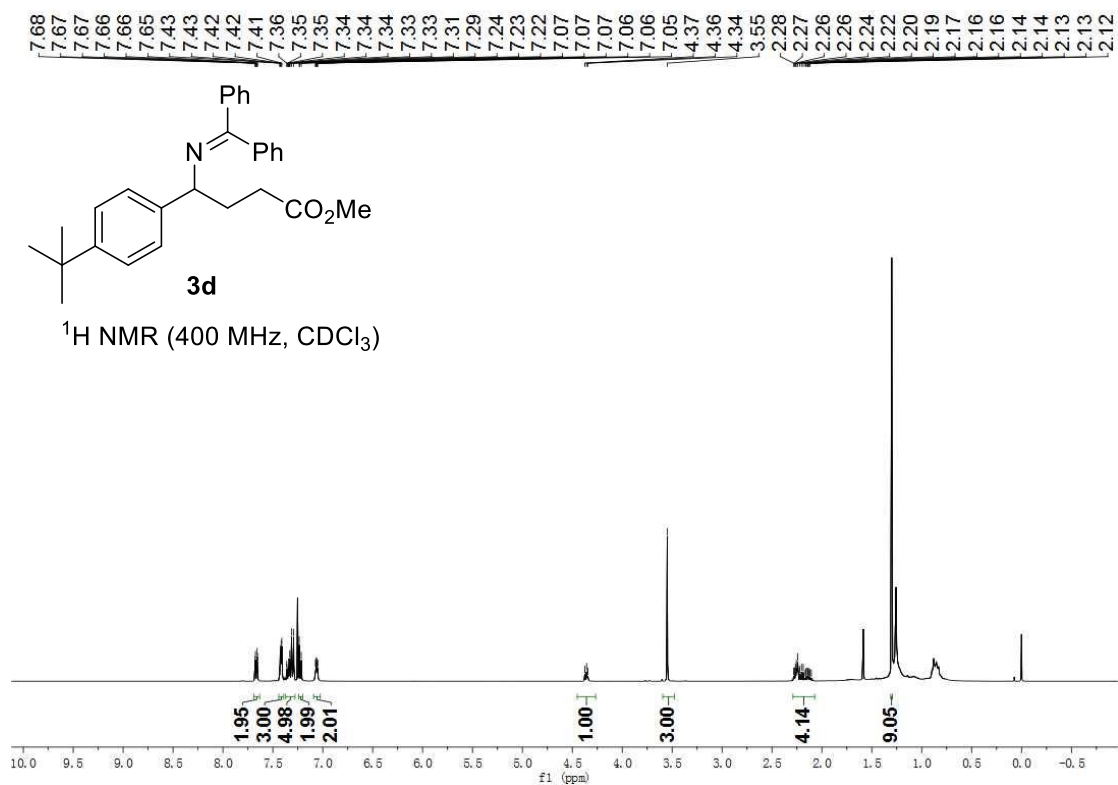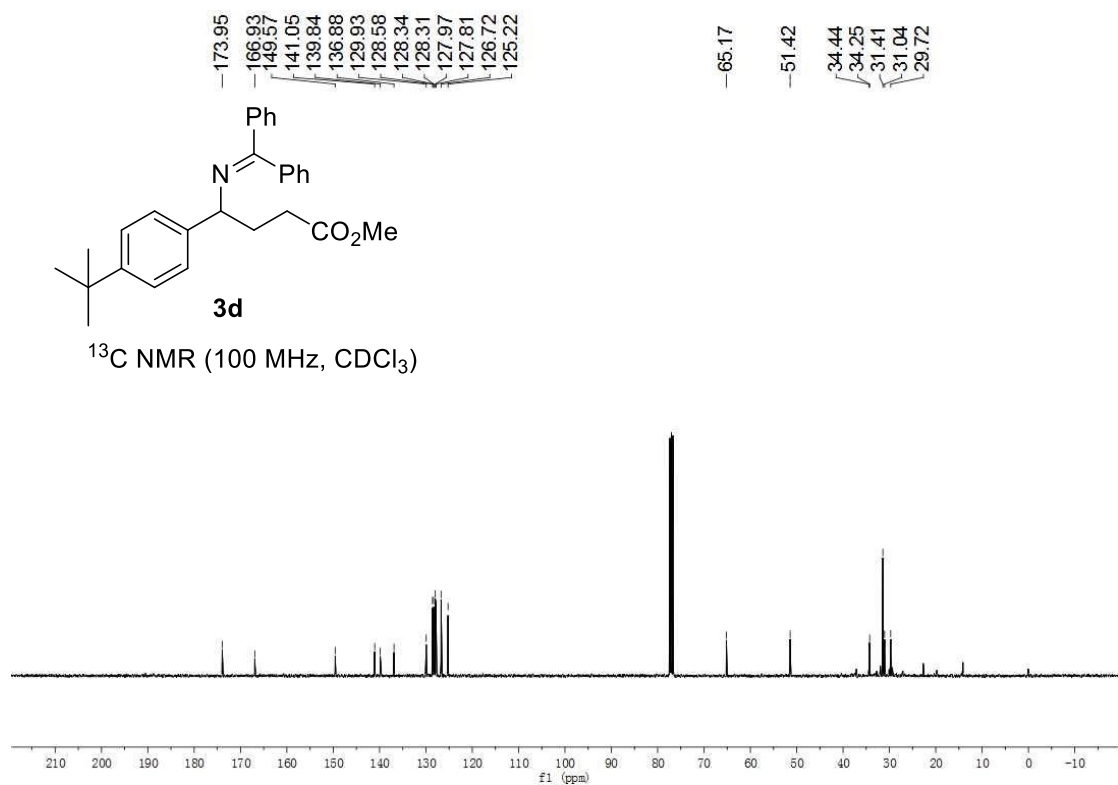

*Methyl 4-((diphenylmethylene)amino)-4-(4-fluorophenyl)butanoate (3e)*

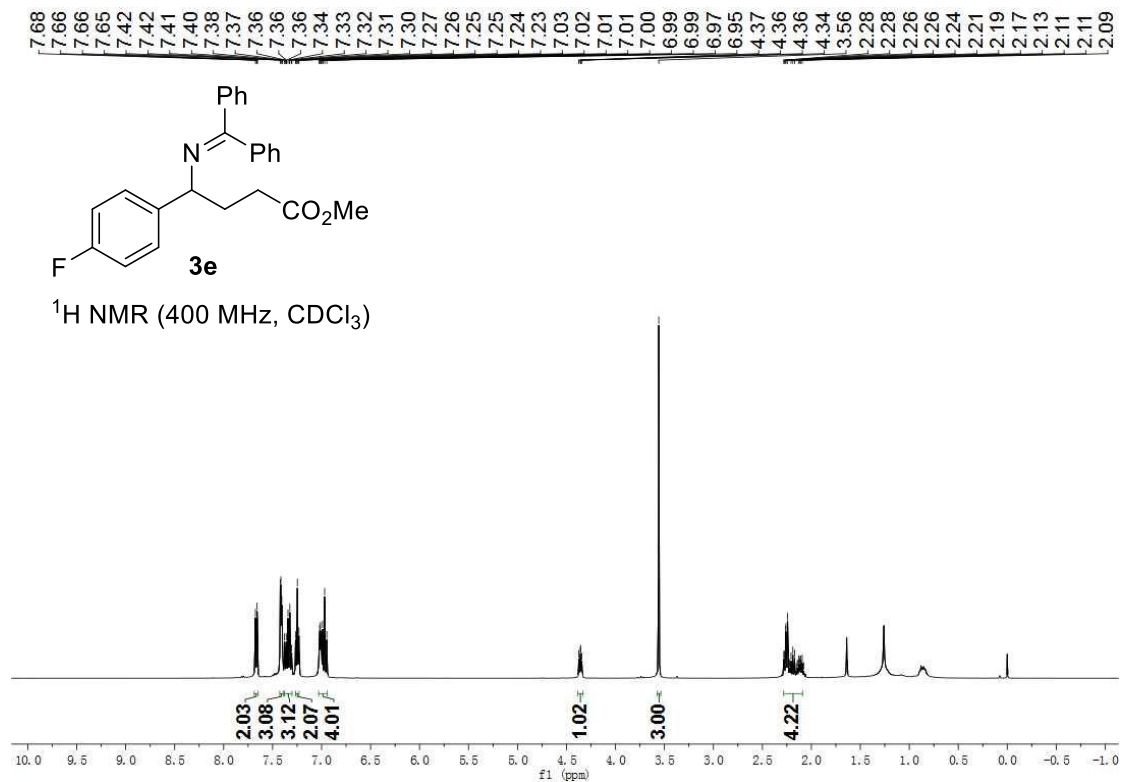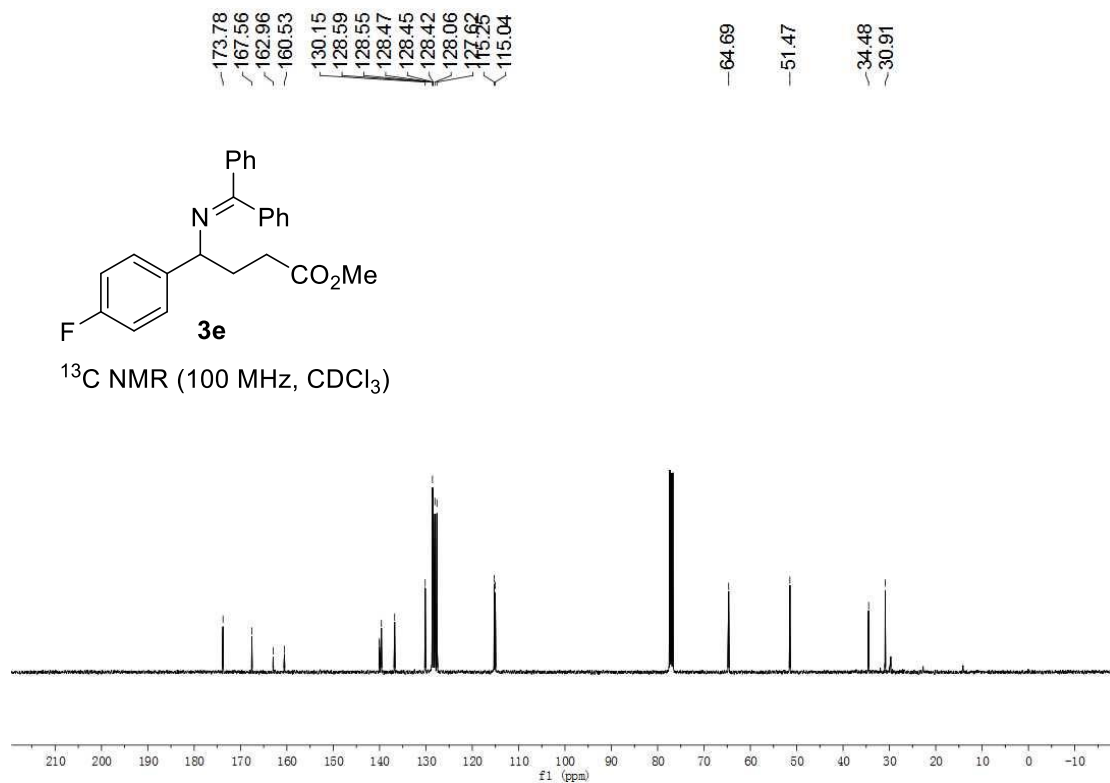

*Methyl 4-(4-chlorophenyl)-4-((diphenylmethylene)amino)butanoate (3f)*

7.68  
7.67  
7.67  
7.66  
7.66  
7.65  
7.42  
7.42  
7.41  
7.40  
7.40  
7.40  
7.38  
7.37  
7.37  
7.36  
7.35  
7.34  
7.34  
7.33  
7.33  
7.31  
7.31  
7.27  
7.26  
7.25  
7.25  
7.24  
7.23  
7.22  
7.21  
7.21  
7.02  
7.01  
7.00  
7.00  
6.99  
4.37  
4.35  
4.35  
4.33  
3.56  
2.28  
2.28  
2.26  
2.25  
2.24  
2.19  
2.17  
2.11  
2.09

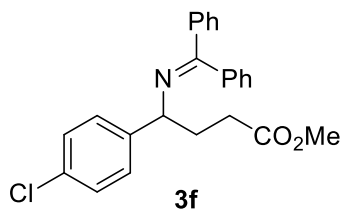

<sup>1</sup>H NMR (400 MHz, CDCl<sub>3</sub>)

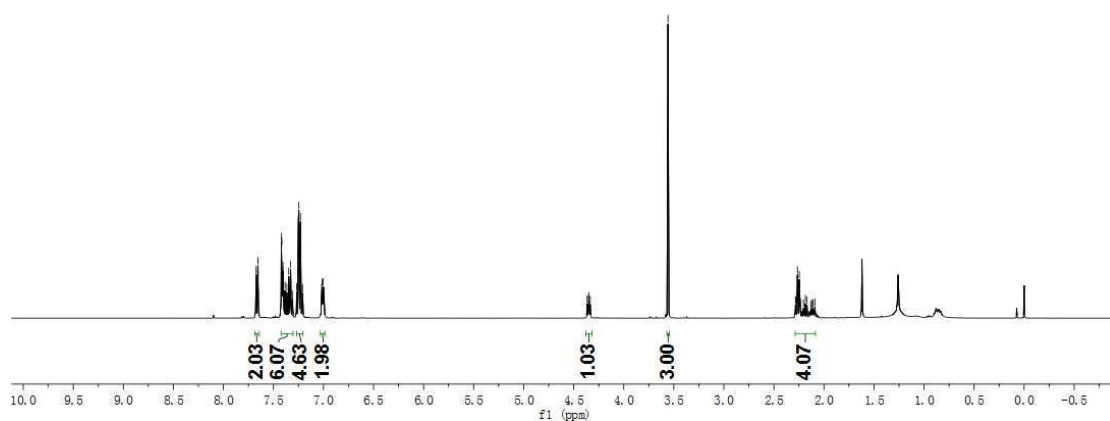

173.72  
167.84  
142.83  
139.54  
136.68  
132.46  
130.20  
128.60  
128.52  
128.49  
128.44  
128.42  
128.07  
127.59

64.71

51.49

34.35

30.85

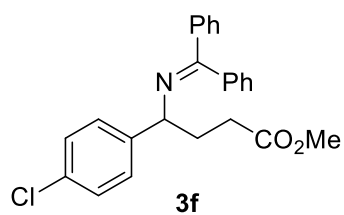

<sup>13</sup>C NMR (100 MHz, CDCl<sub>3</sub>)

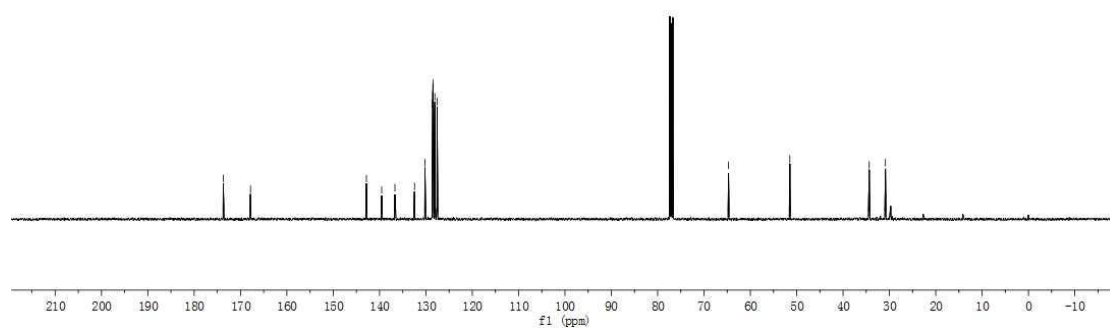

*Methyl 4-(4-bromophenyl)-4-((diphenylmethylene)amino)butanoate (3g)*

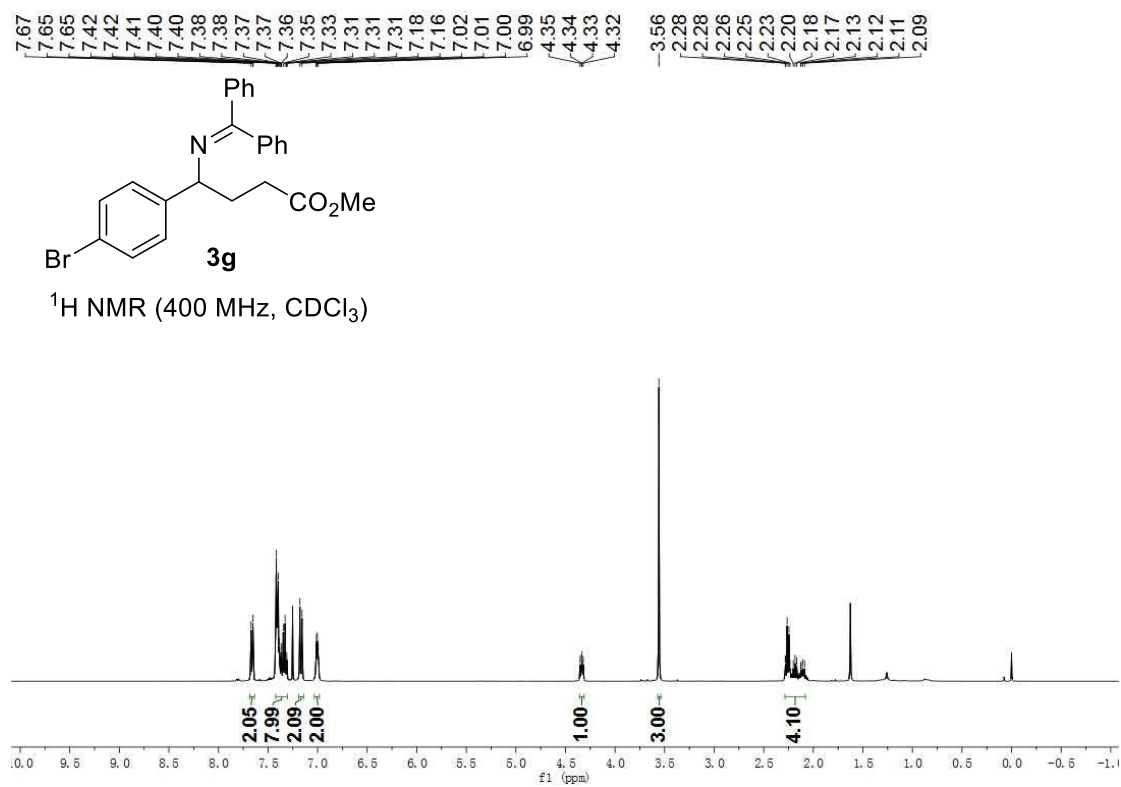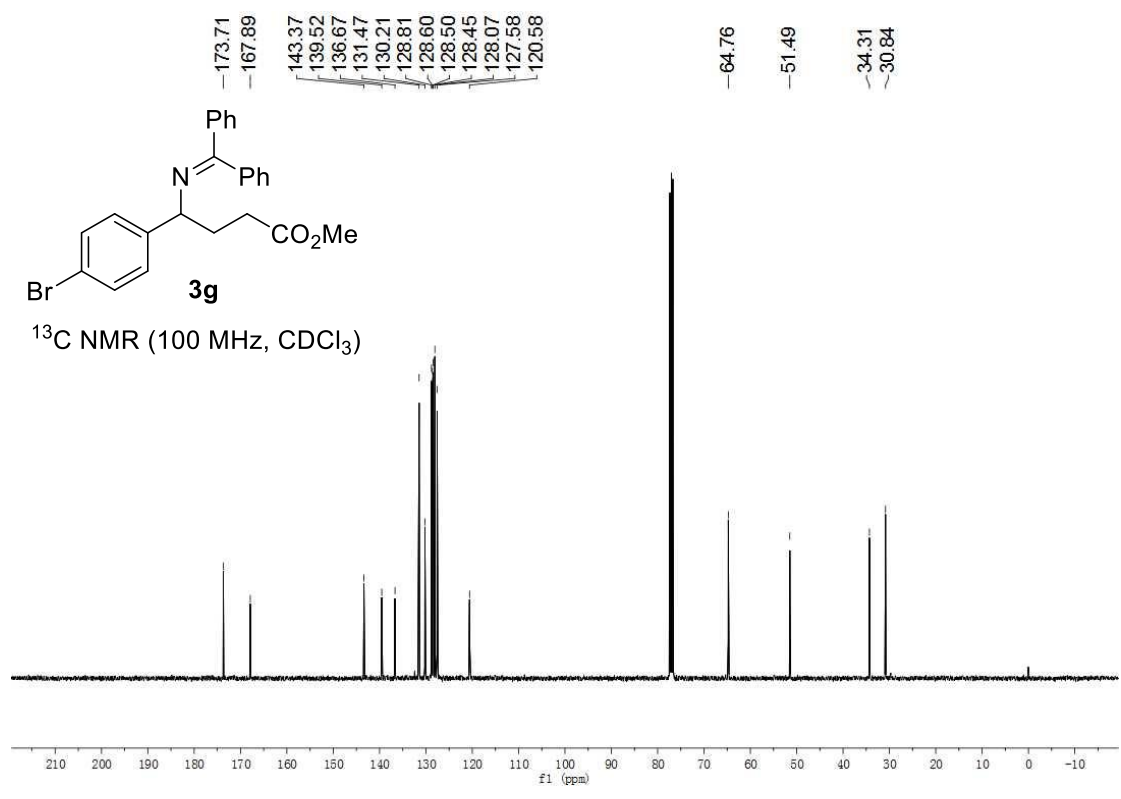



*Methyl 4-((diphenylmethylene)amino)-4-(4-iodophenyl)butanoate (3h)*

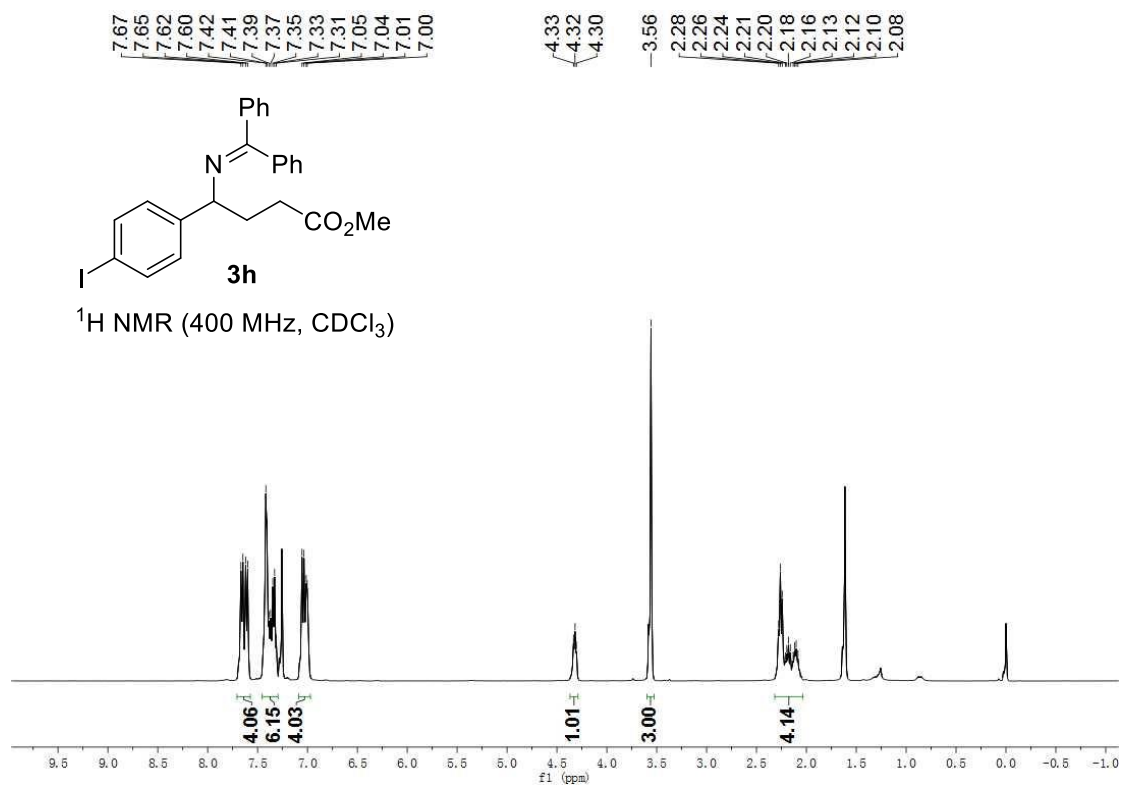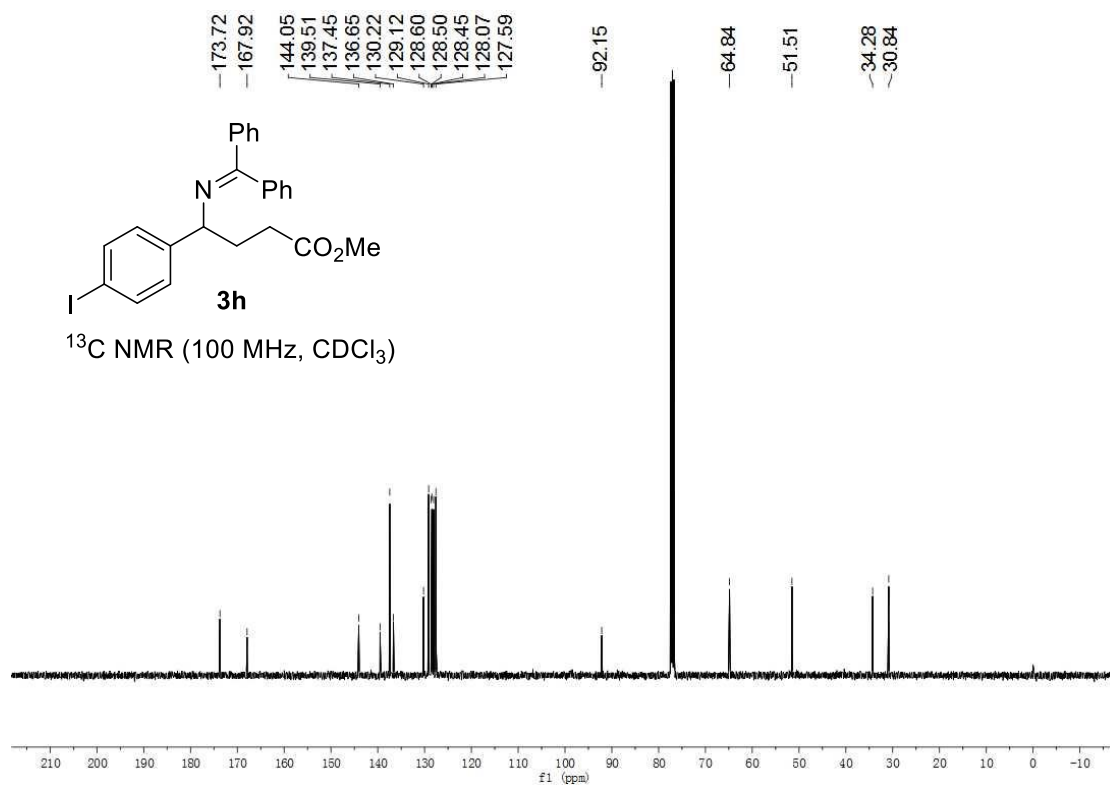

*Methyl 4-(1-((diphenylmethylene)amino)-4-methoxy-4-oxobutyl)benzoate (3i)*

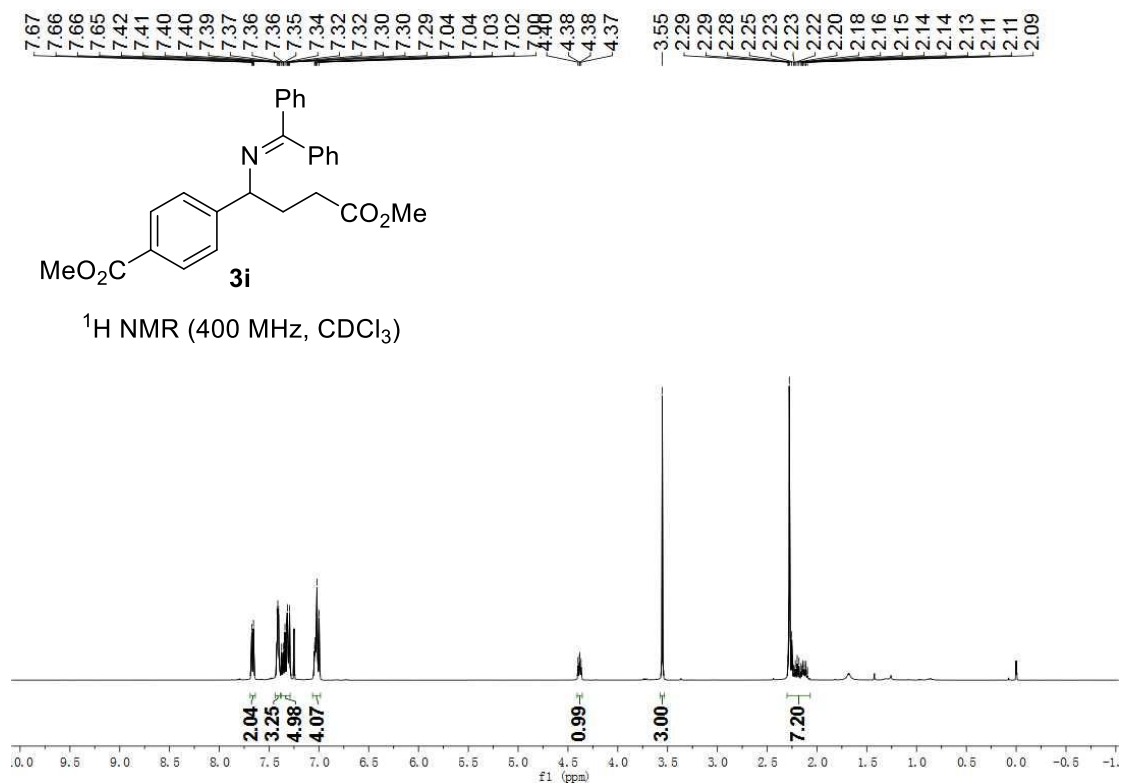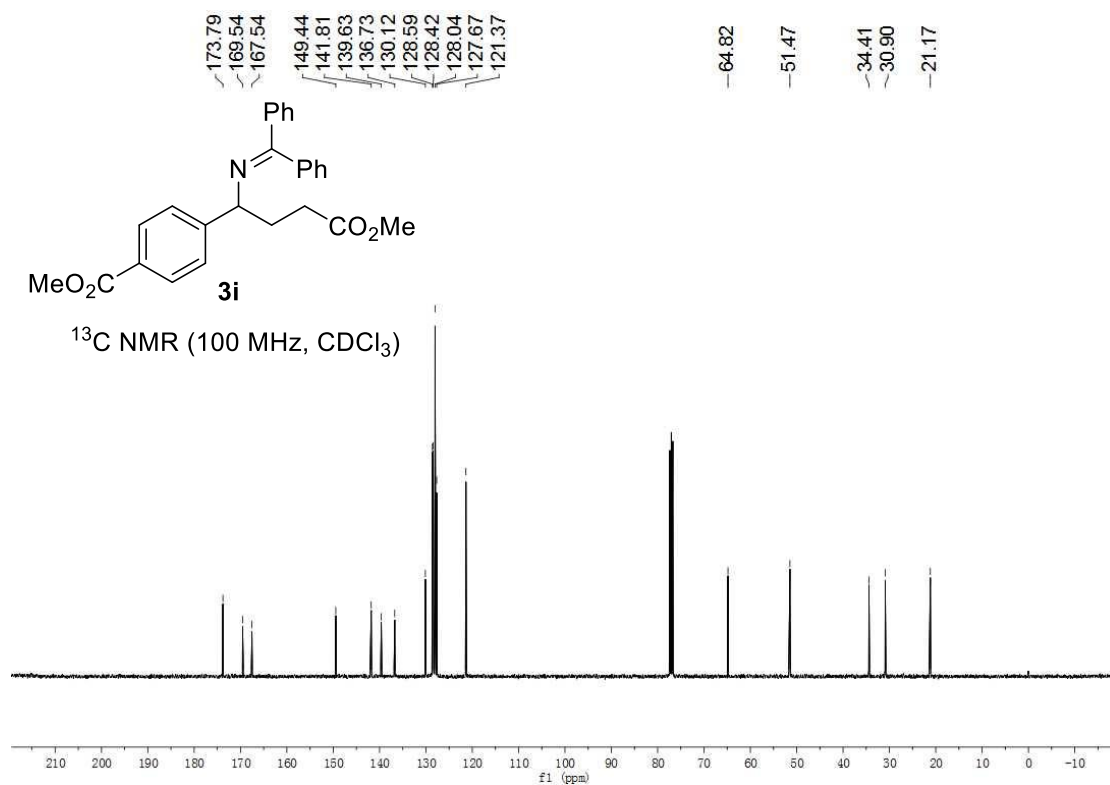

*Methyl 4-(4-cyanophenyl)-4-((diphenylmethylene)amino)butanoate (3j)*

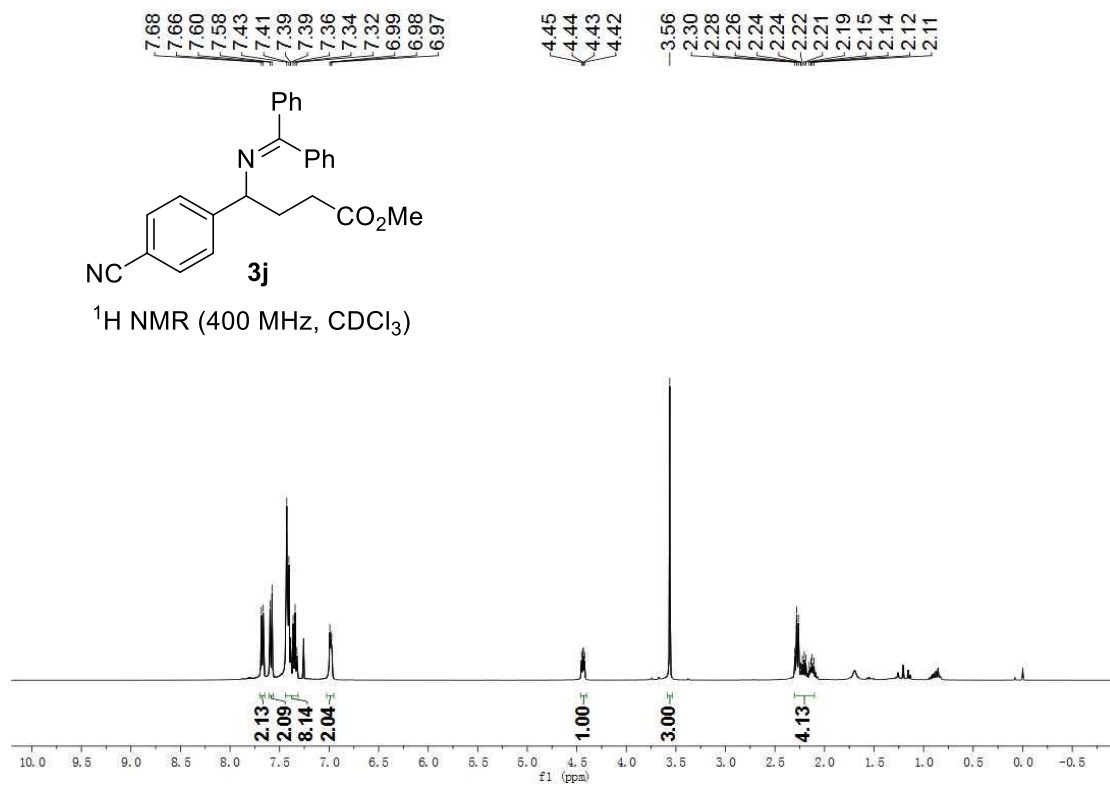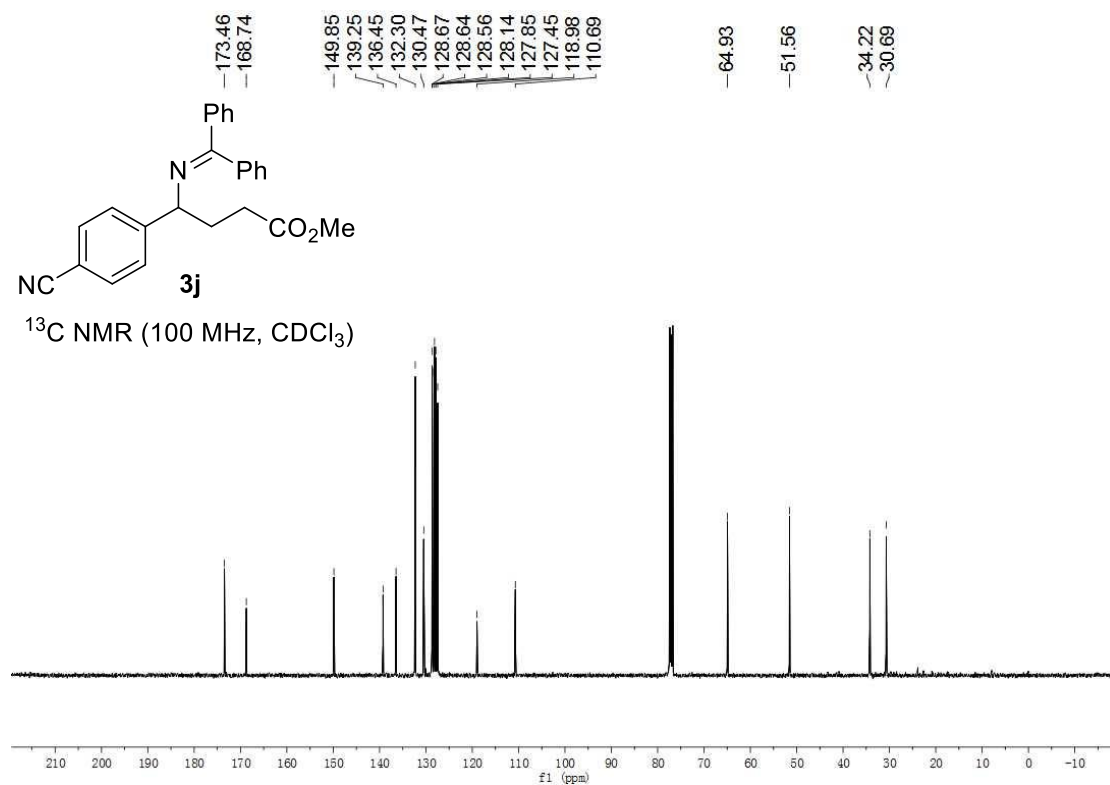

*Methyl 4-((diphenylmethylene)amino)-4-(4-(trifluoromethyl)phenyl)butanoate (3k)*

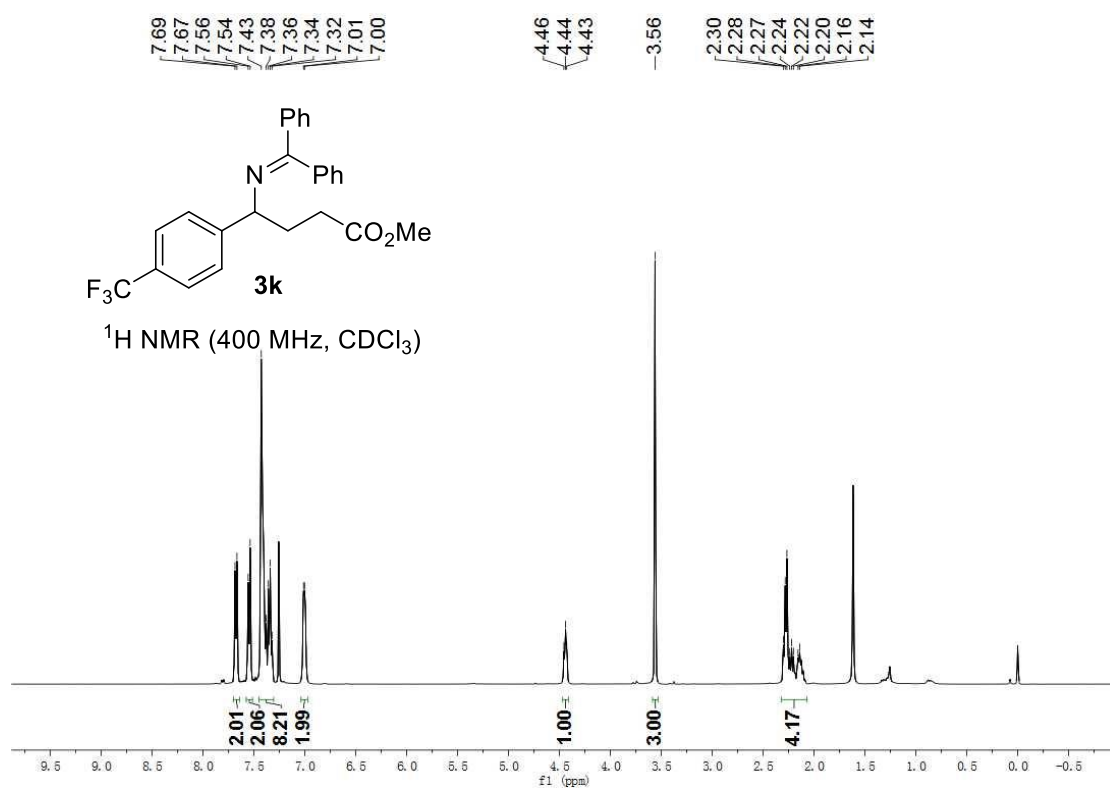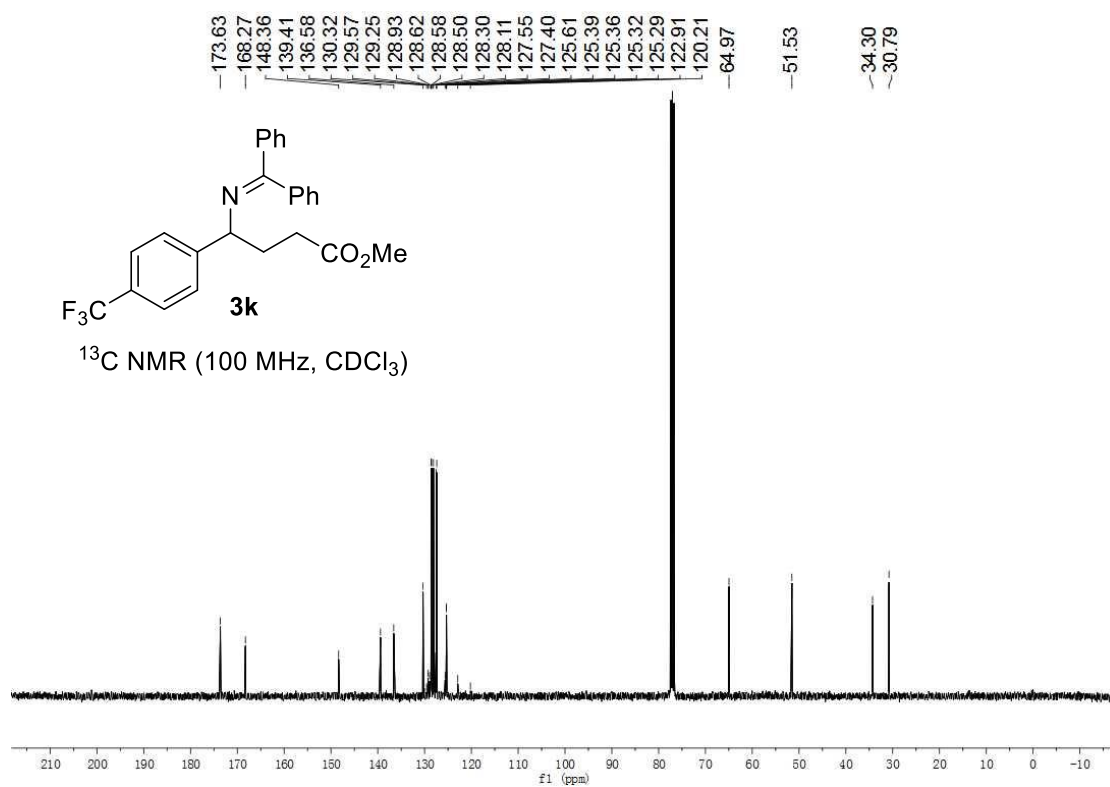

*Methyl 4-((diphenylmethylene)amino)-4-(o-tolyl)butanoate (3I)*

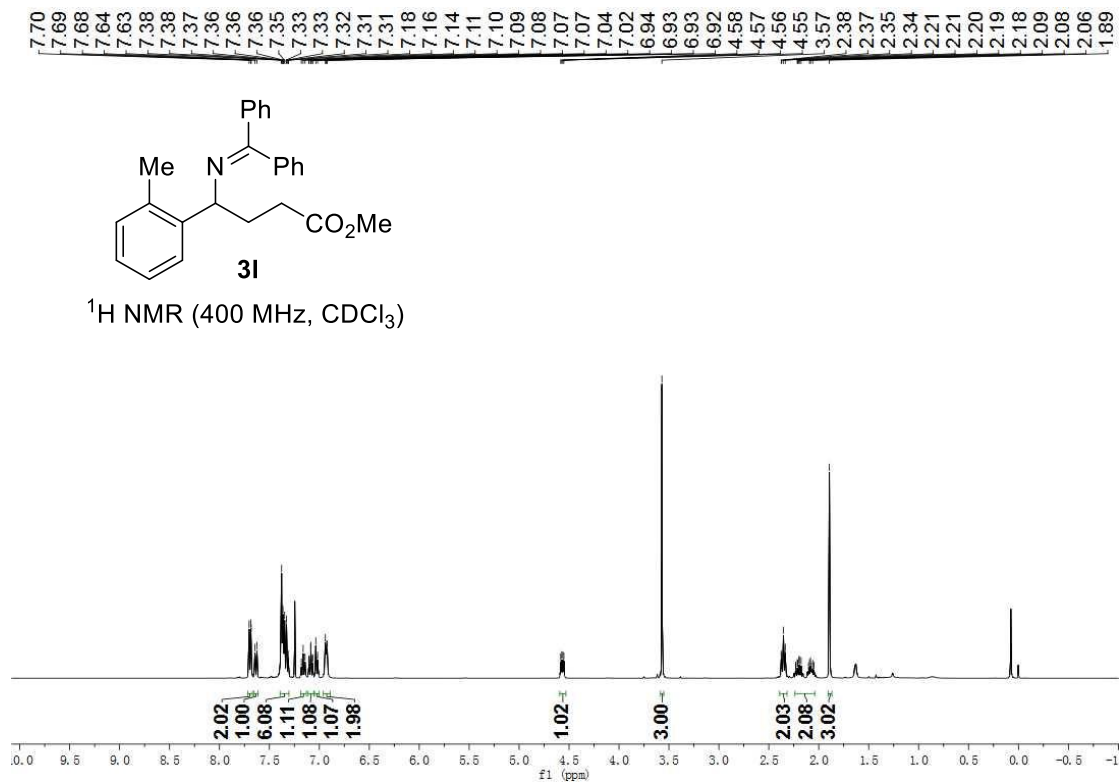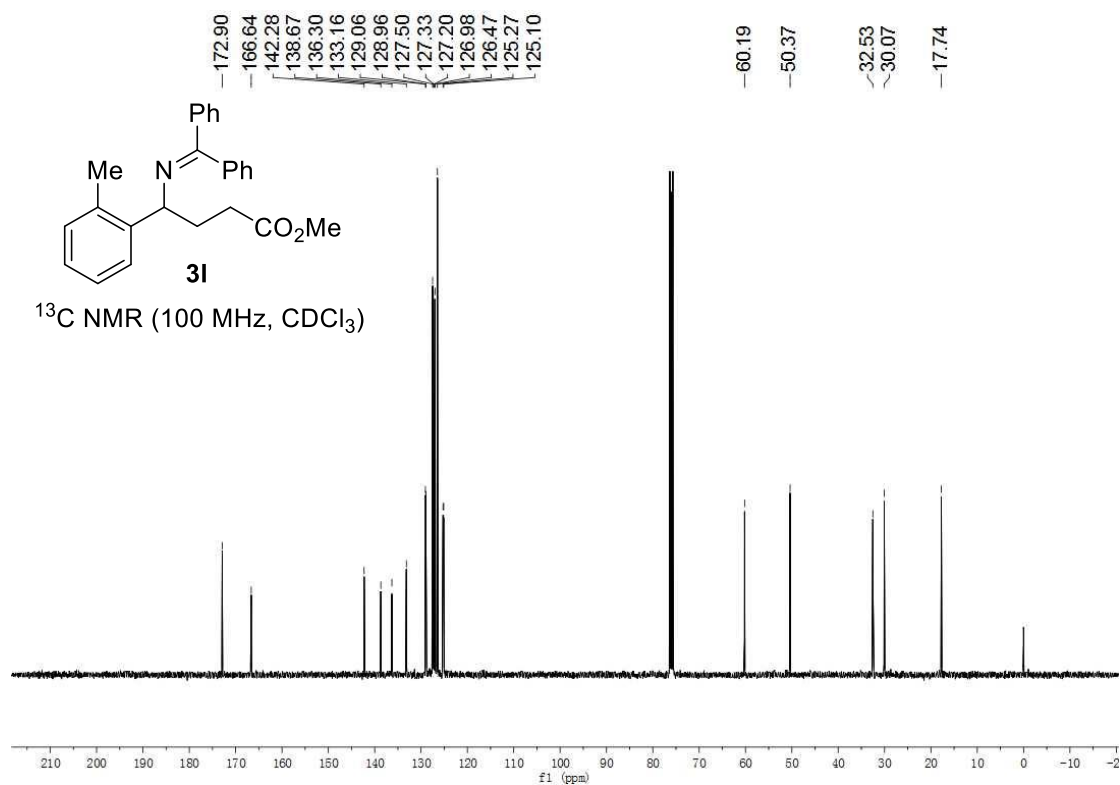

*Methyl 4-((diphenylmethylene)amino)-4-(m-tolyl)butanoate (3m)*

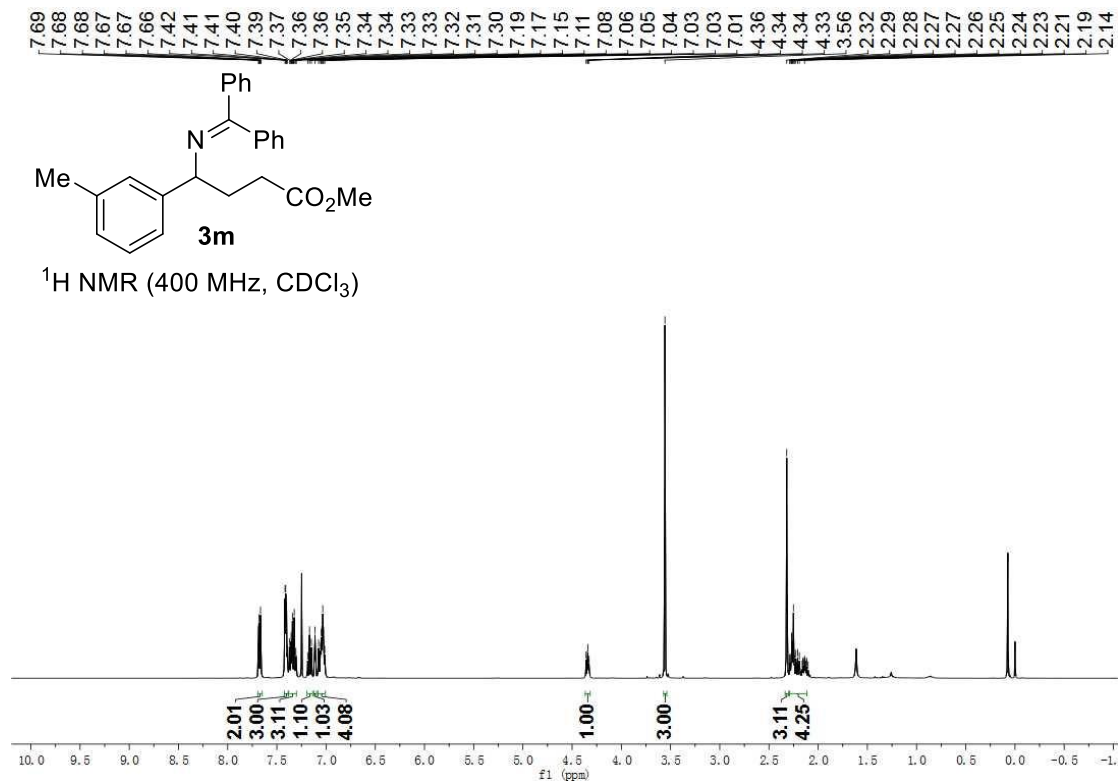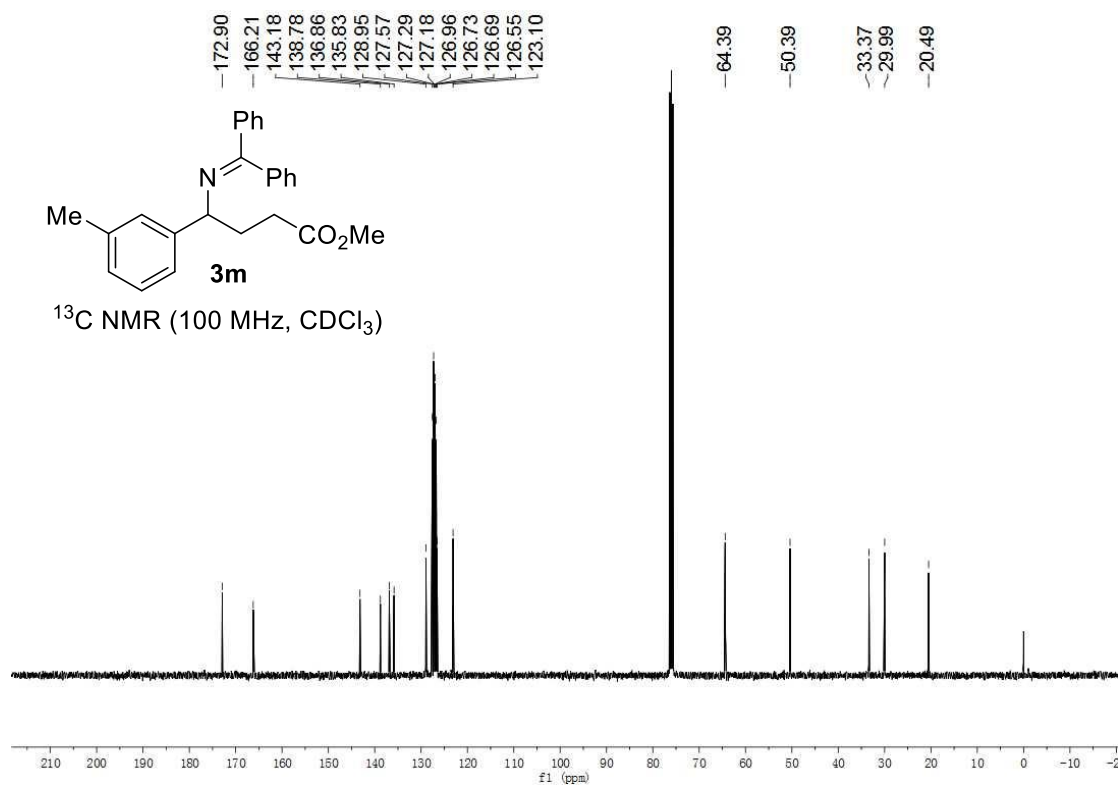

*Methyl 4-((diphenylmethylene)amino)-4-(2-fluorophenyl)butanoate (3n)*

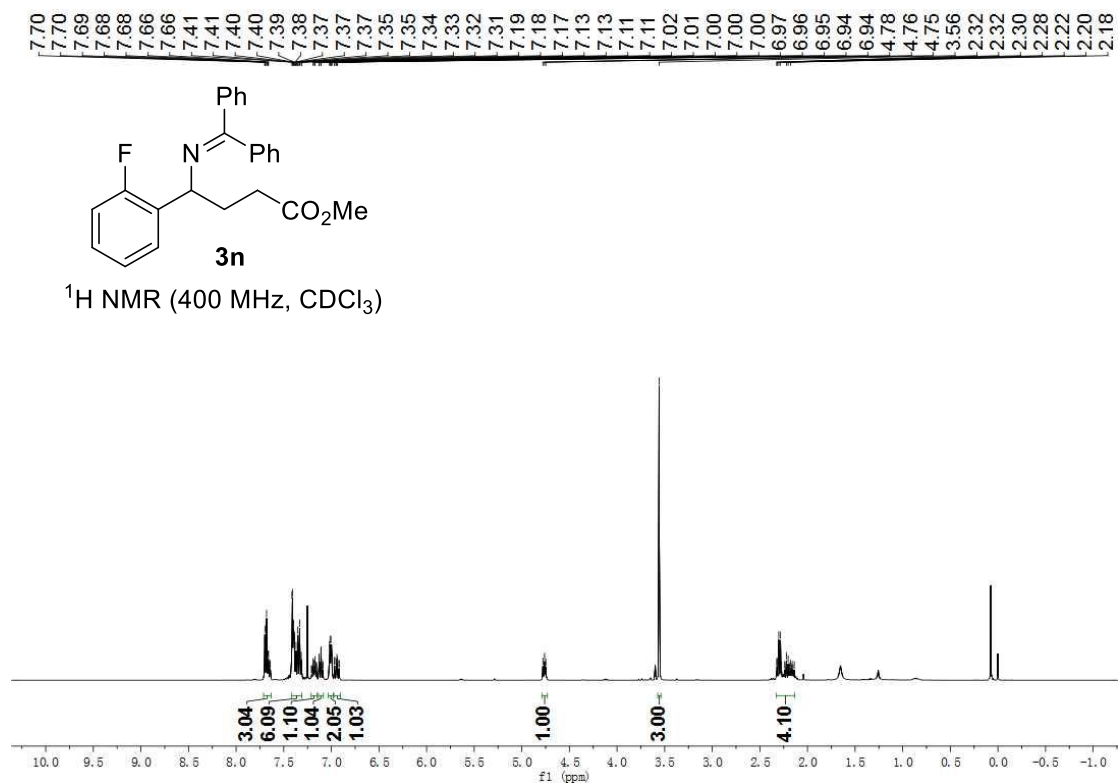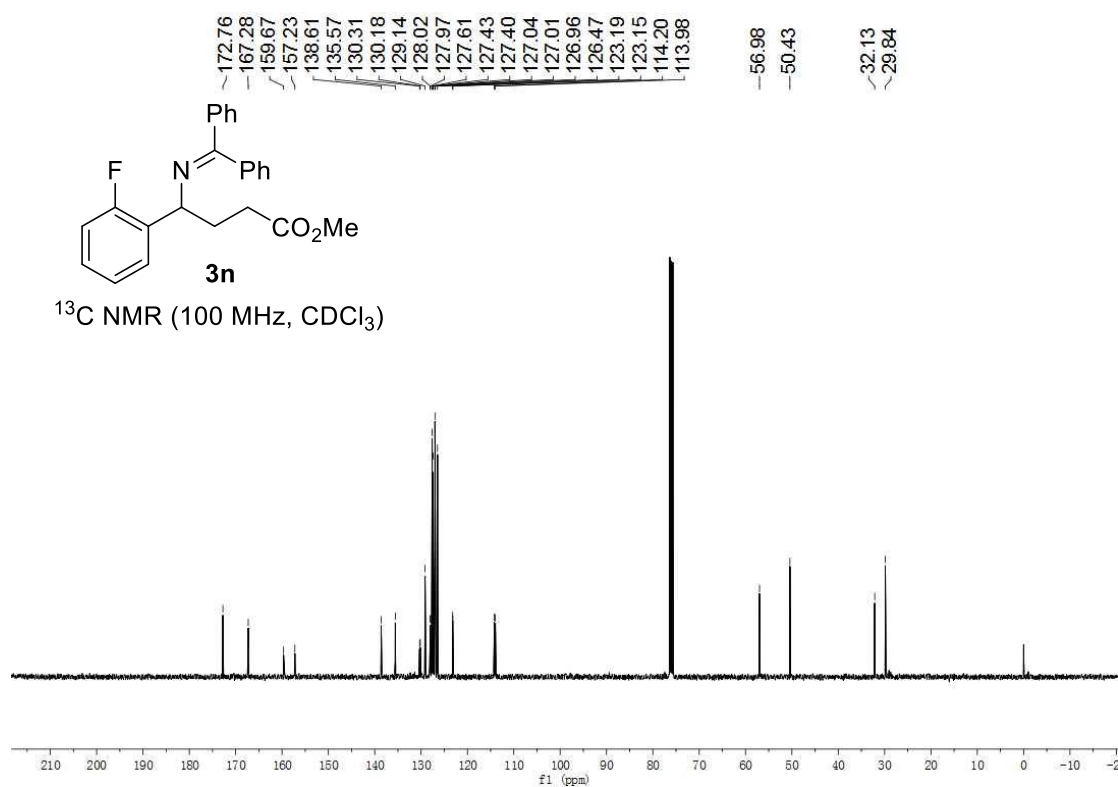

*Methyl 4-(3-chlorophenyl)-4-((diphenylmethylene)amino)butanoate (3o)*

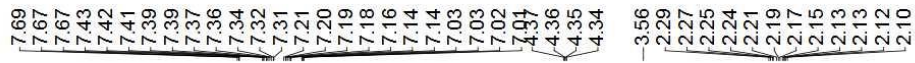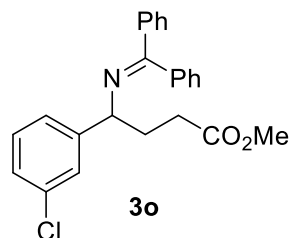

<sup>1</sup>H NMR (400 MHz, CDCl<sub>3</sub>)

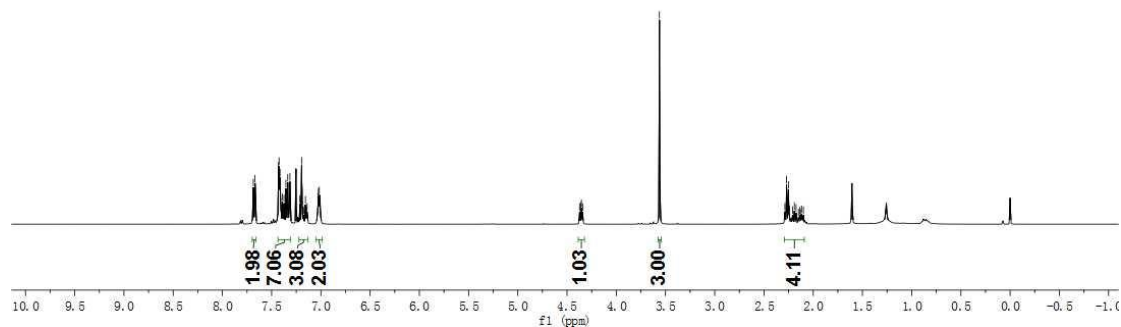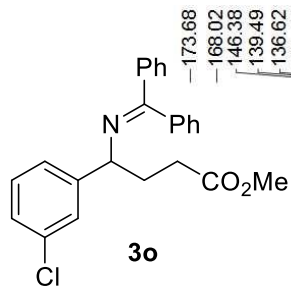

<sup>13</sup>C NMR (100 MHz, CDCl<sub>3</sub>)

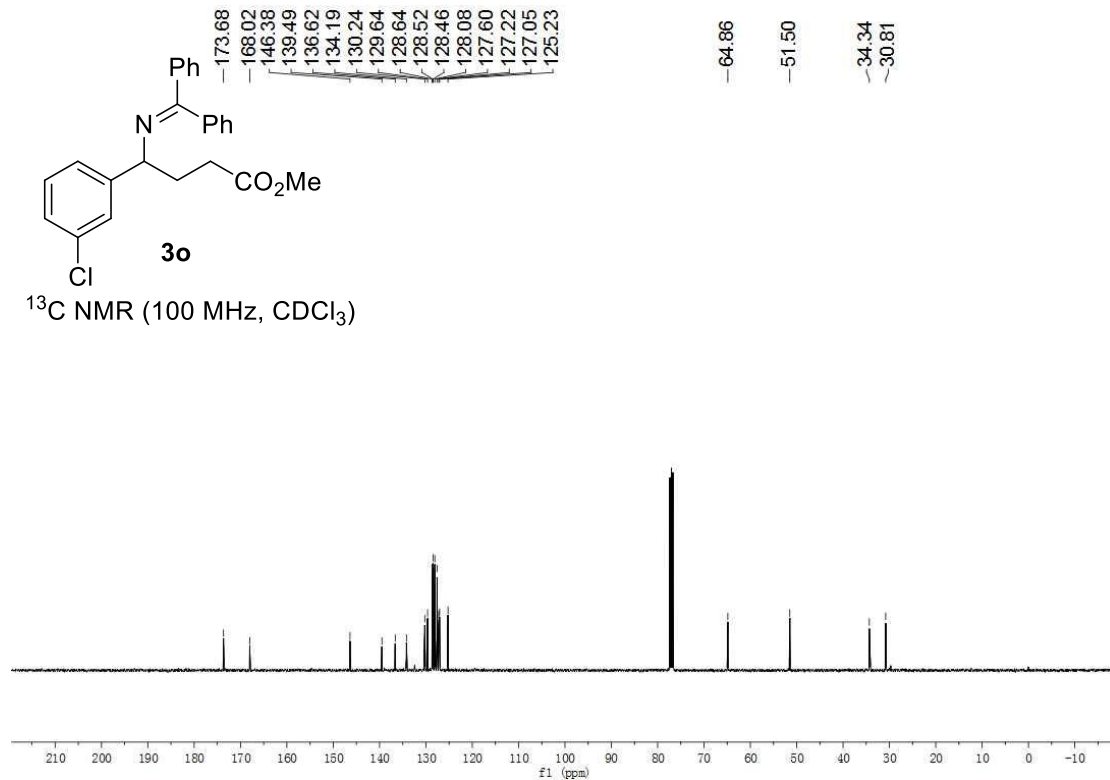



*Methyl 4-((diphenylmethylene)amino)-4-(perfluorophenyl)butanoate (3p)*

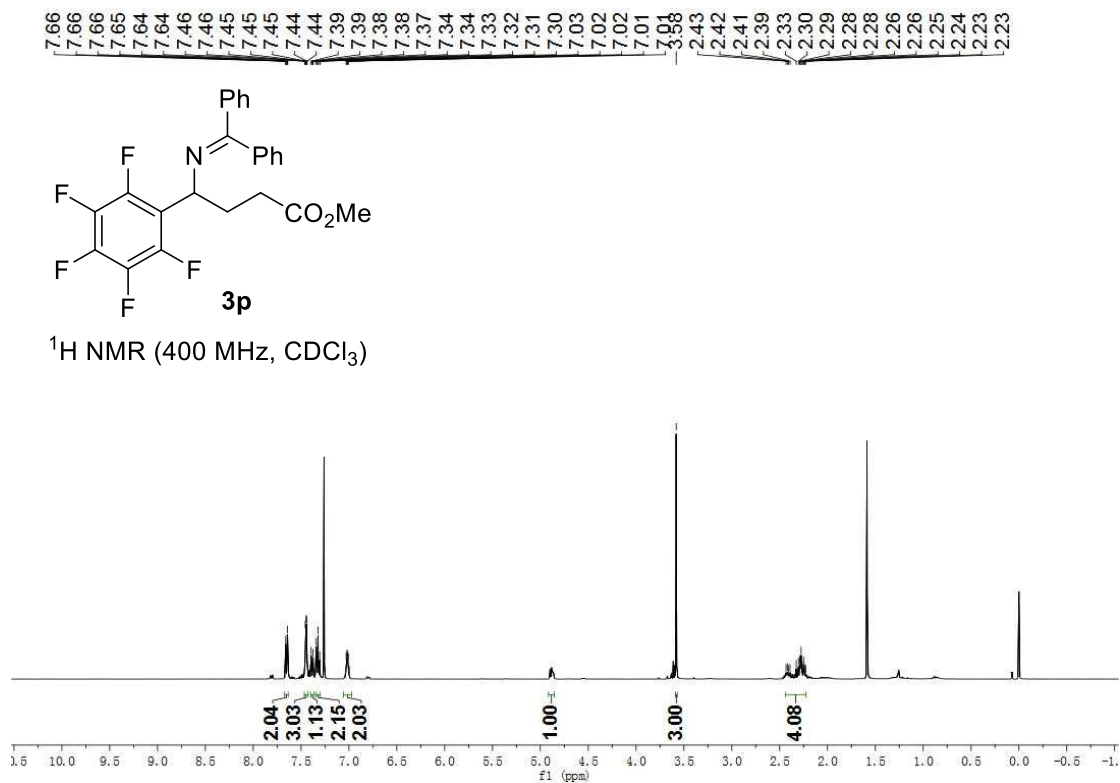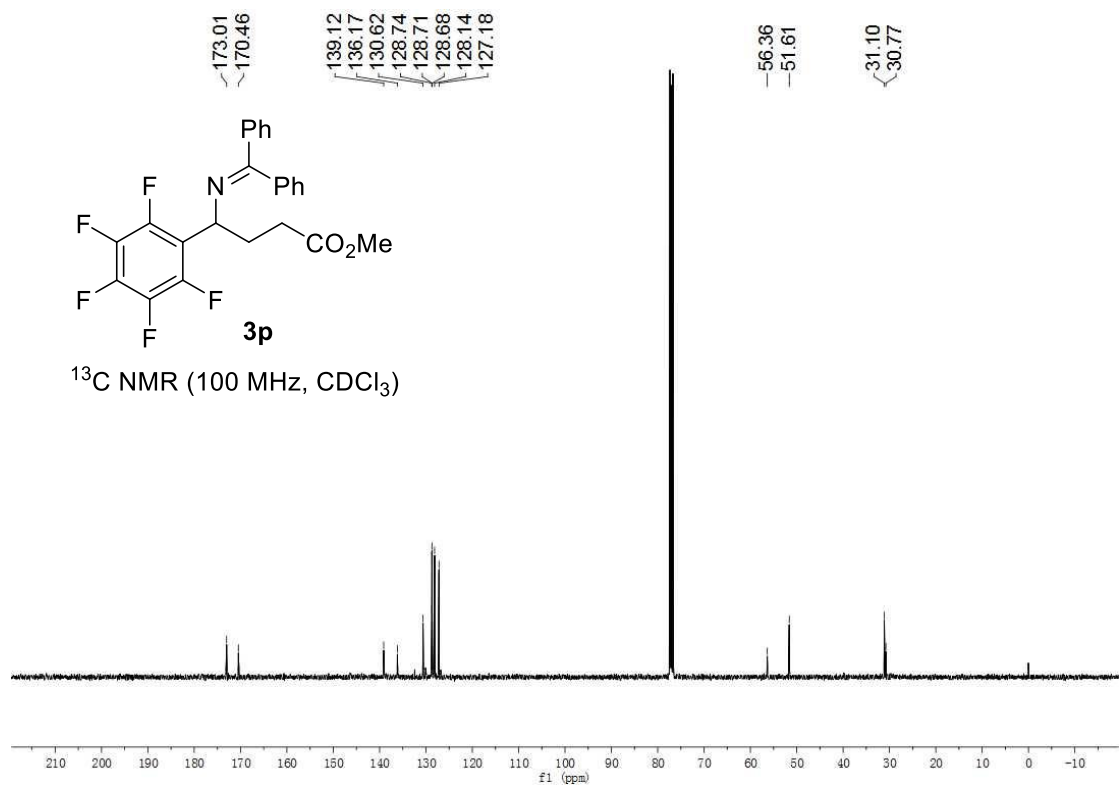

*Methyl 4-((diphenylmethylene)amino)-4-(pyridin-4-yl)butanoate (3q)*

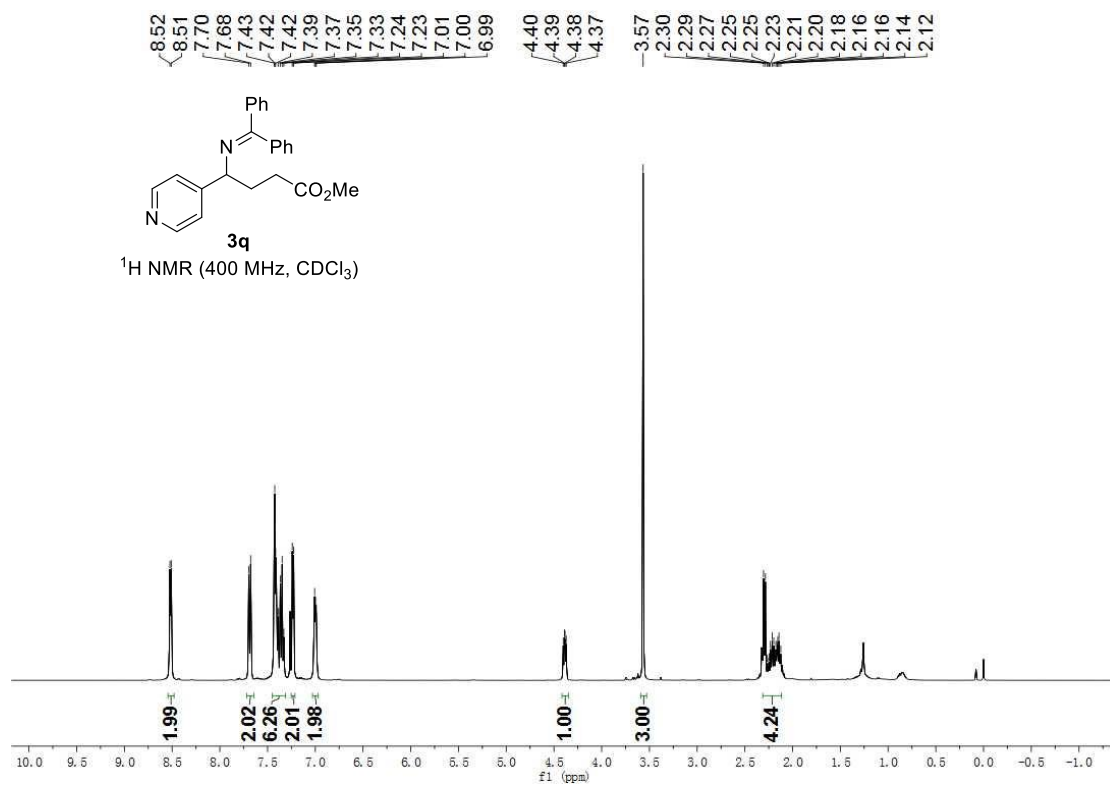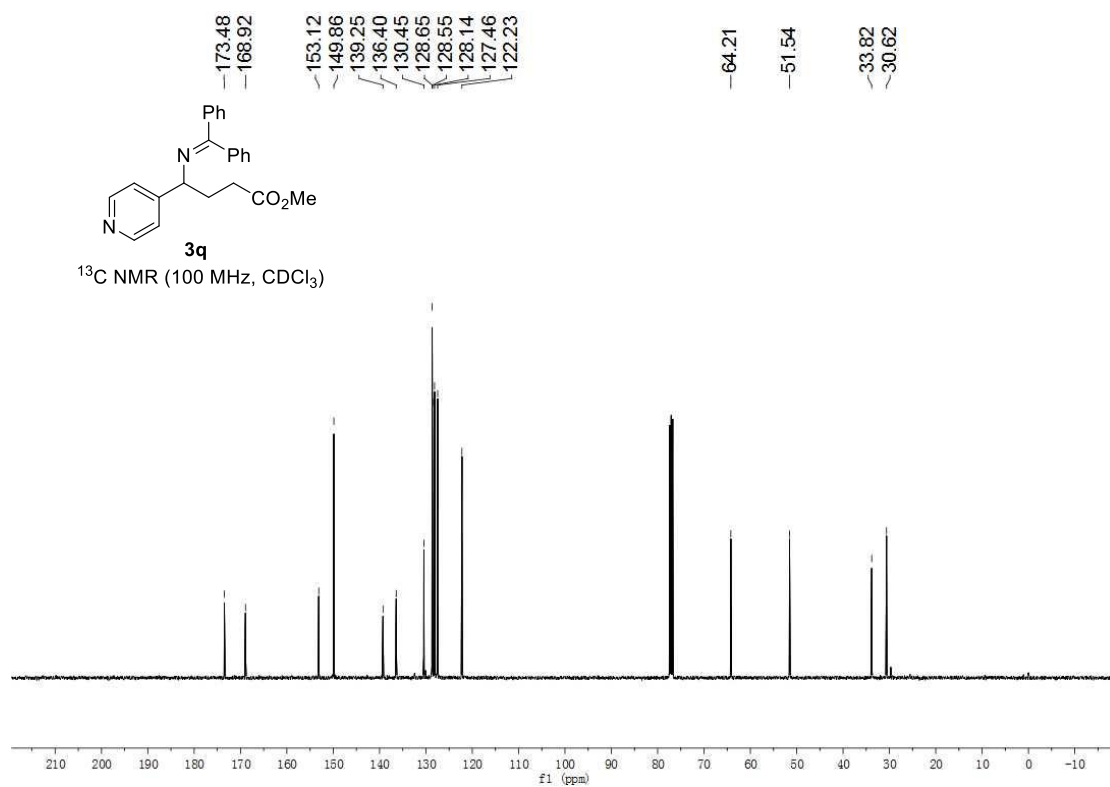



**Methyl 4-([1,1'-biphenyl]-4-yl)-4-((diphenylmethylene)amino)butanoate (3s)**

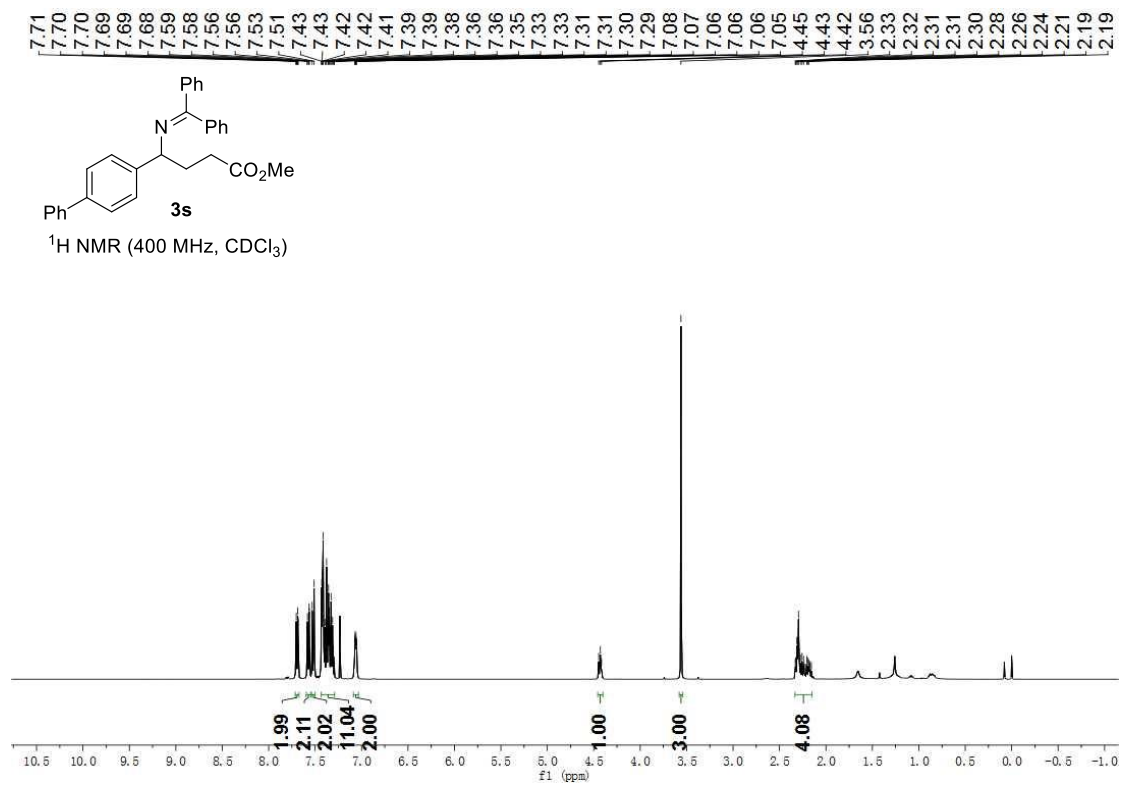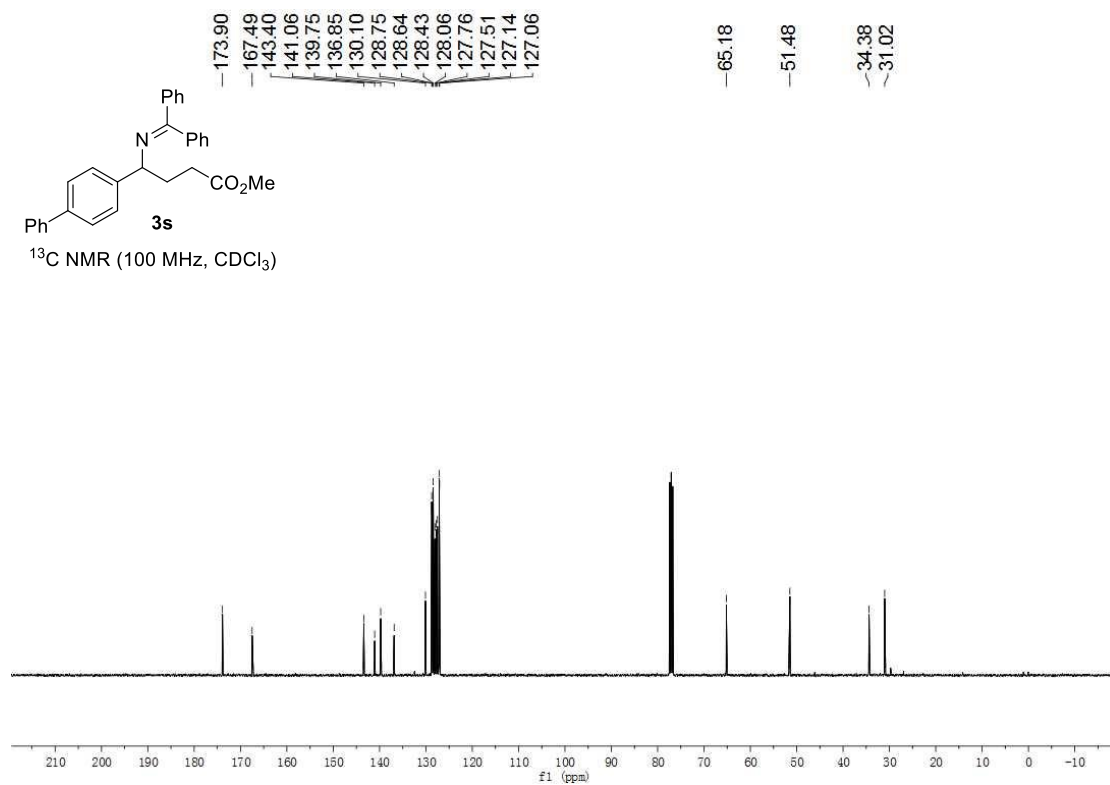

*Methyl 4-((diphenylmethylene)amino)-4-(naphthalen-2-yl)butanoate (3t)*

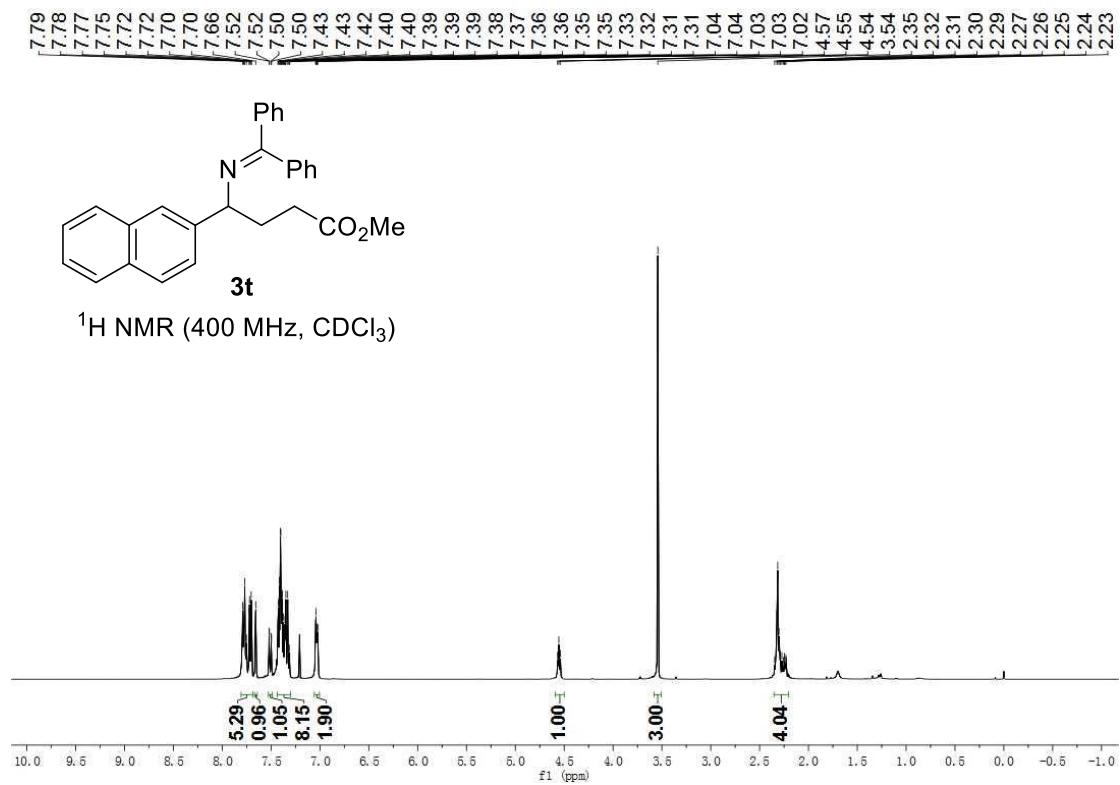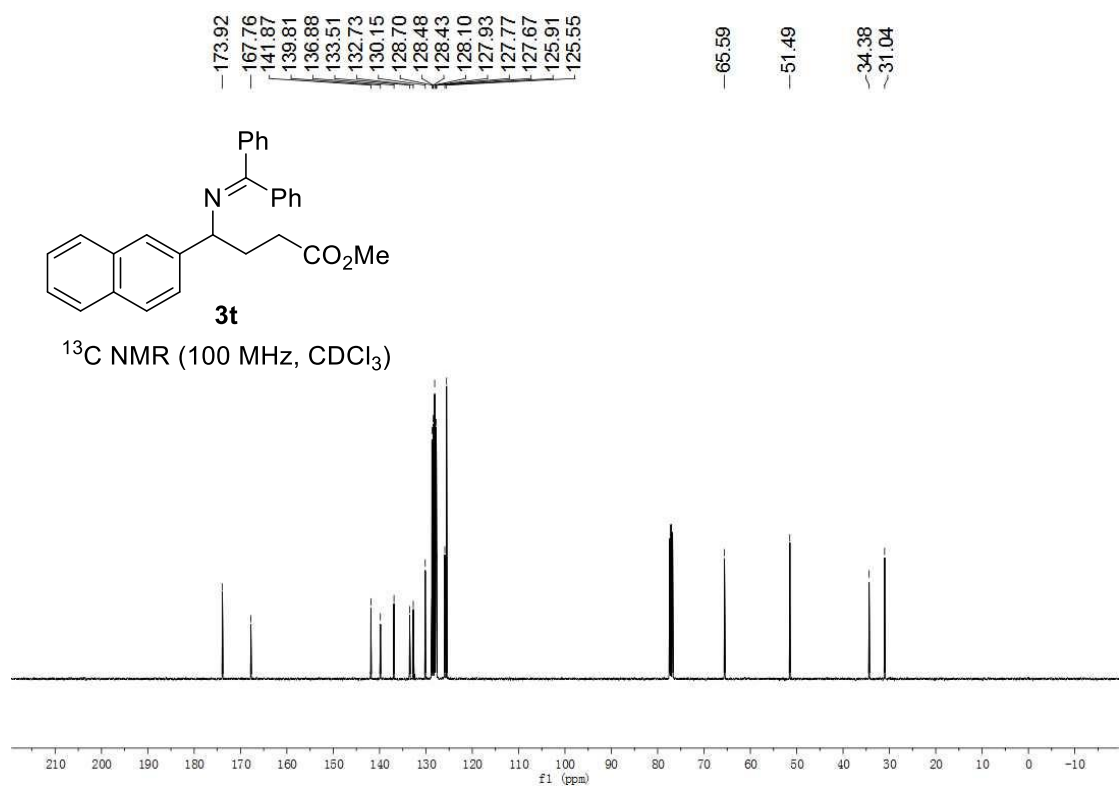

**Methyl 4-(bicyclo[4.2.0]octa-1(6),2,4-trien-3-yl)-4-((diphenylmethylene)amino)butanoate (3u)**

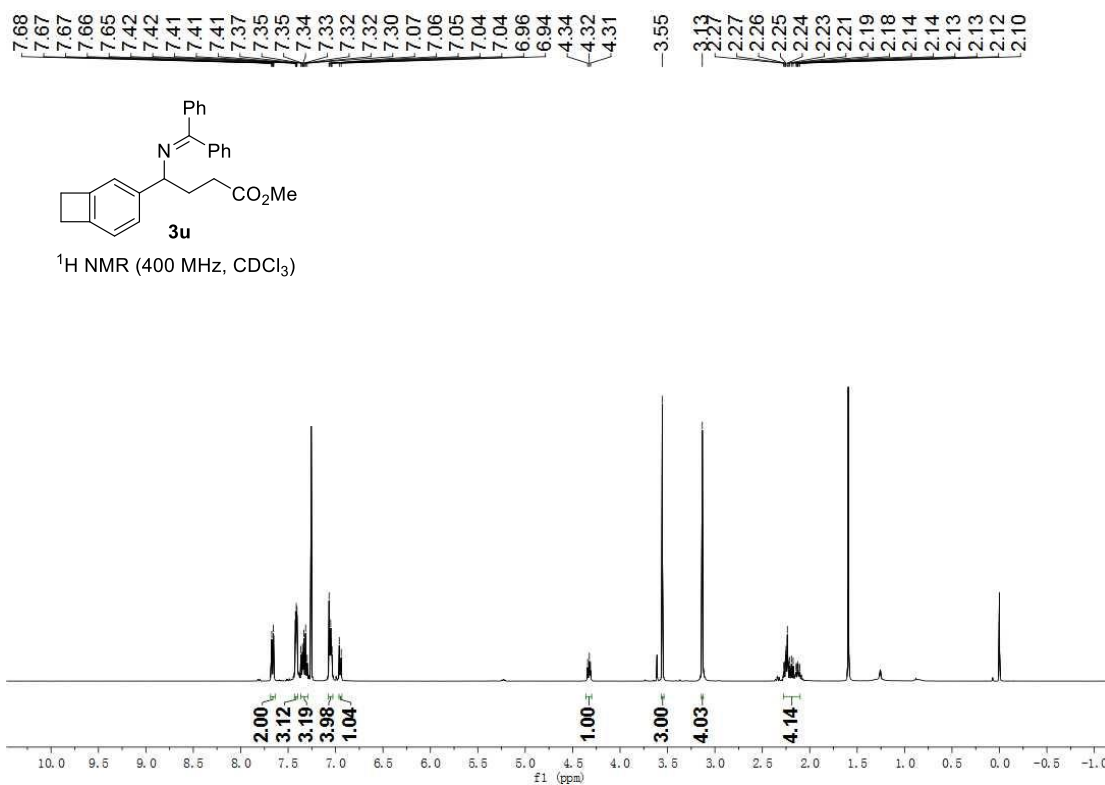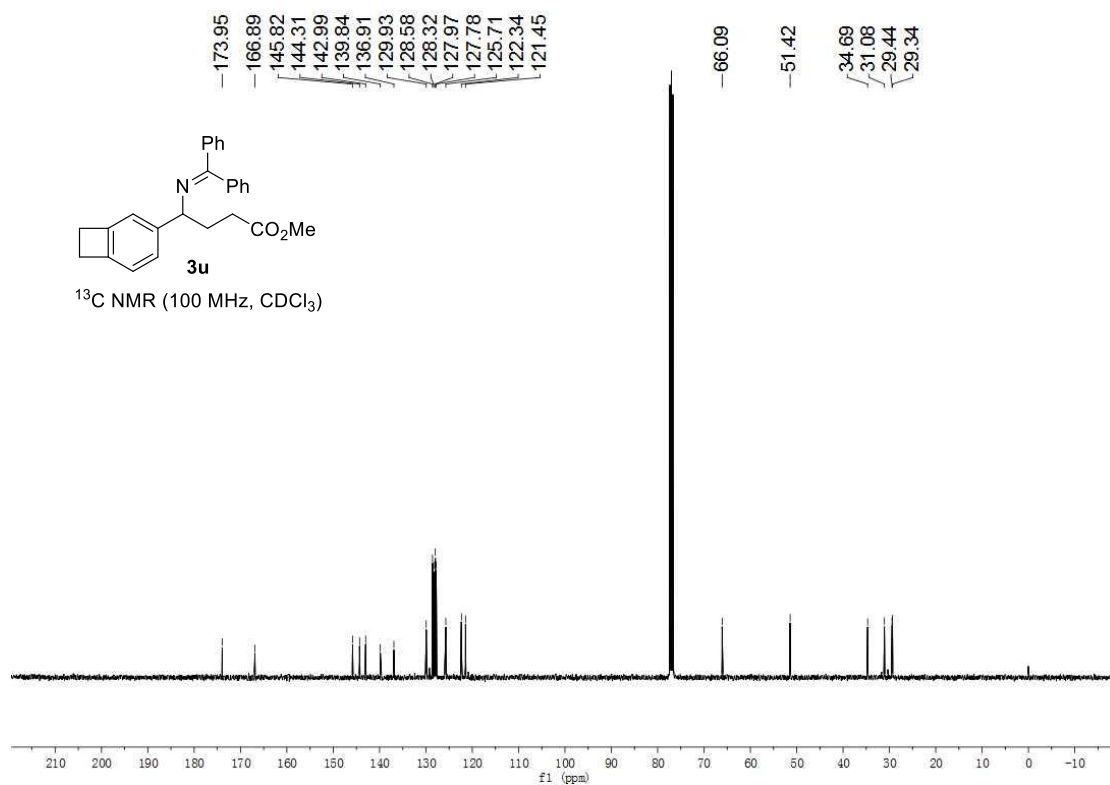

*Methyl 4-((diphenylmethylene)amino)-4-phenylpentanoate (3v)*

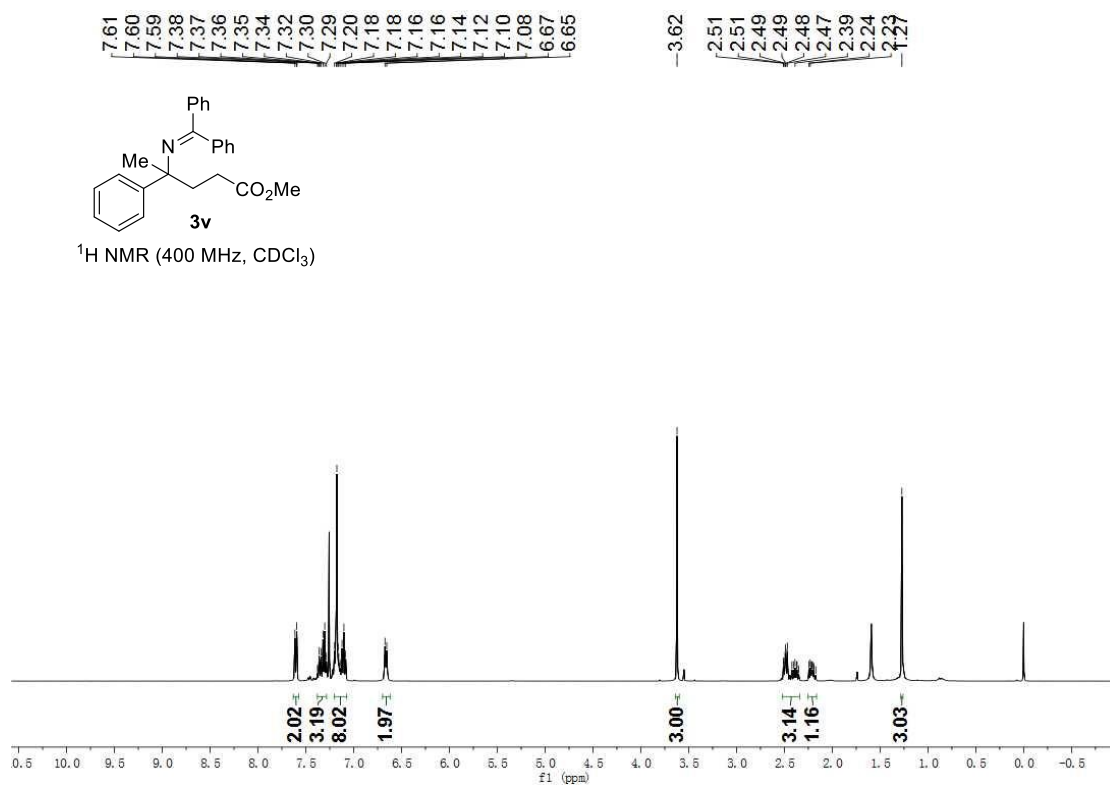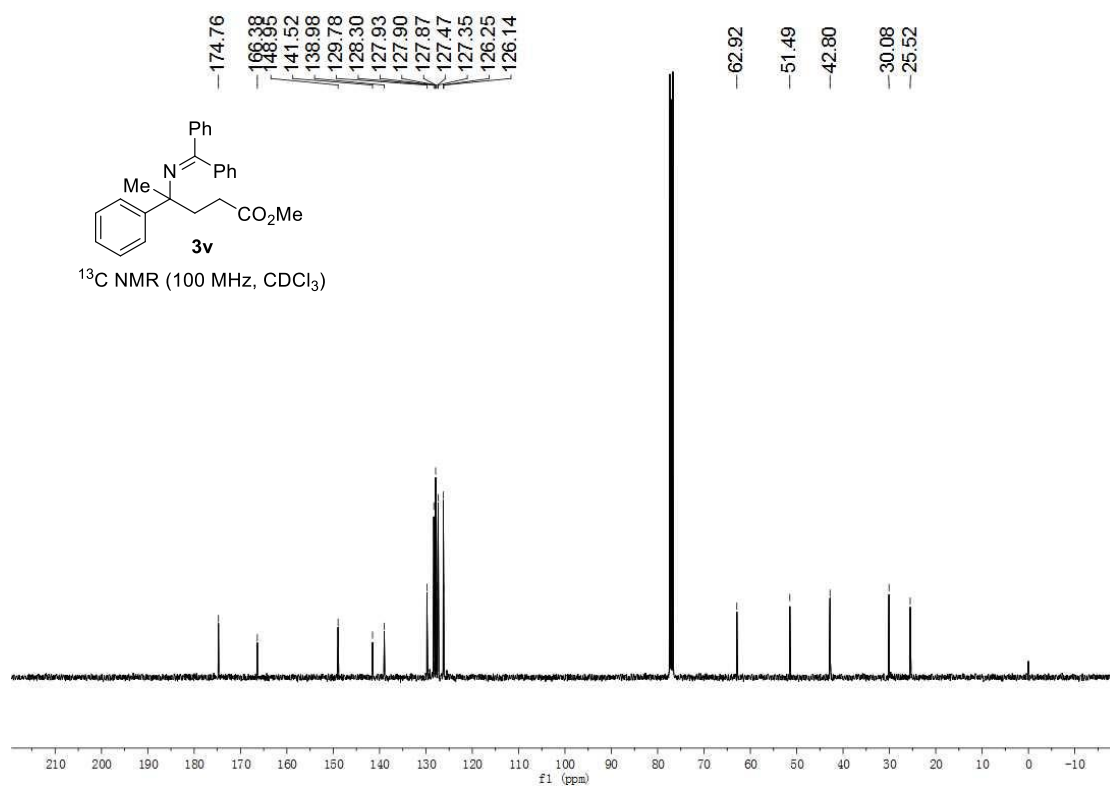

*Methyl 4-((diphenylmethylene)amino)-4,4-diphenylbutanoate (3w)*

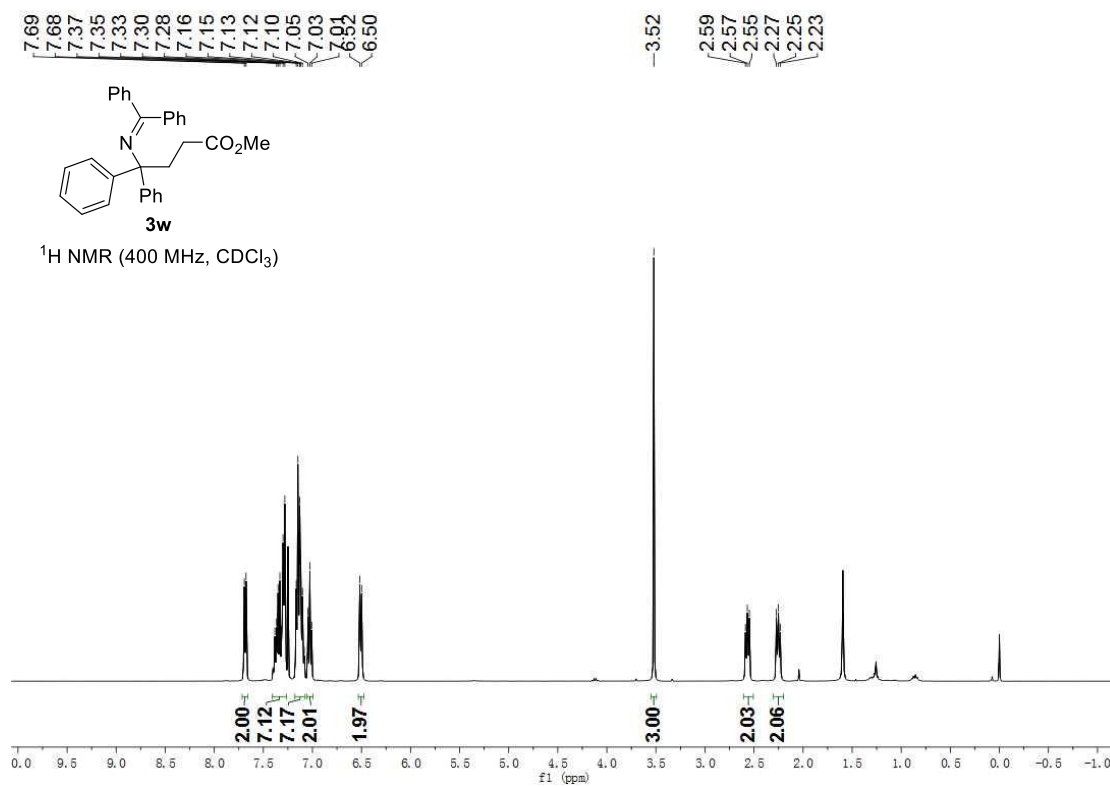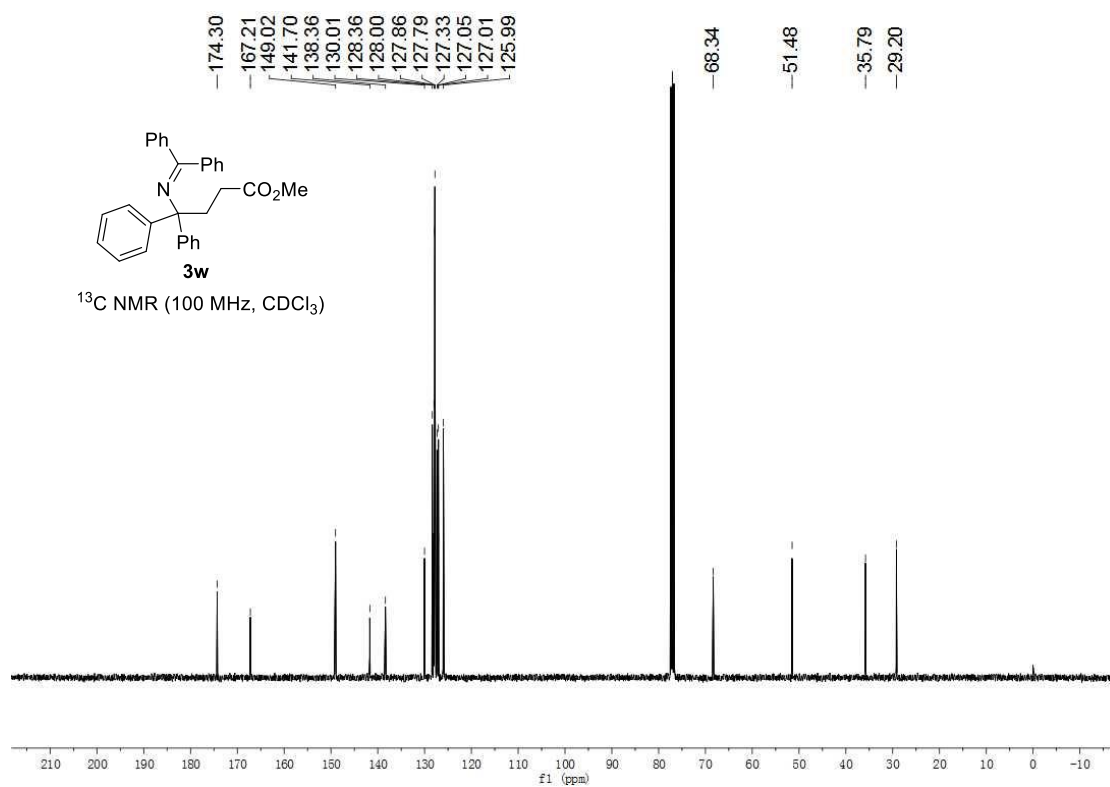



*Methyl 3-(1-((diphenylmethylene)amino)-1,2,3,4-tetrahydronaphthalen-1-yl)propanoate (3x)*

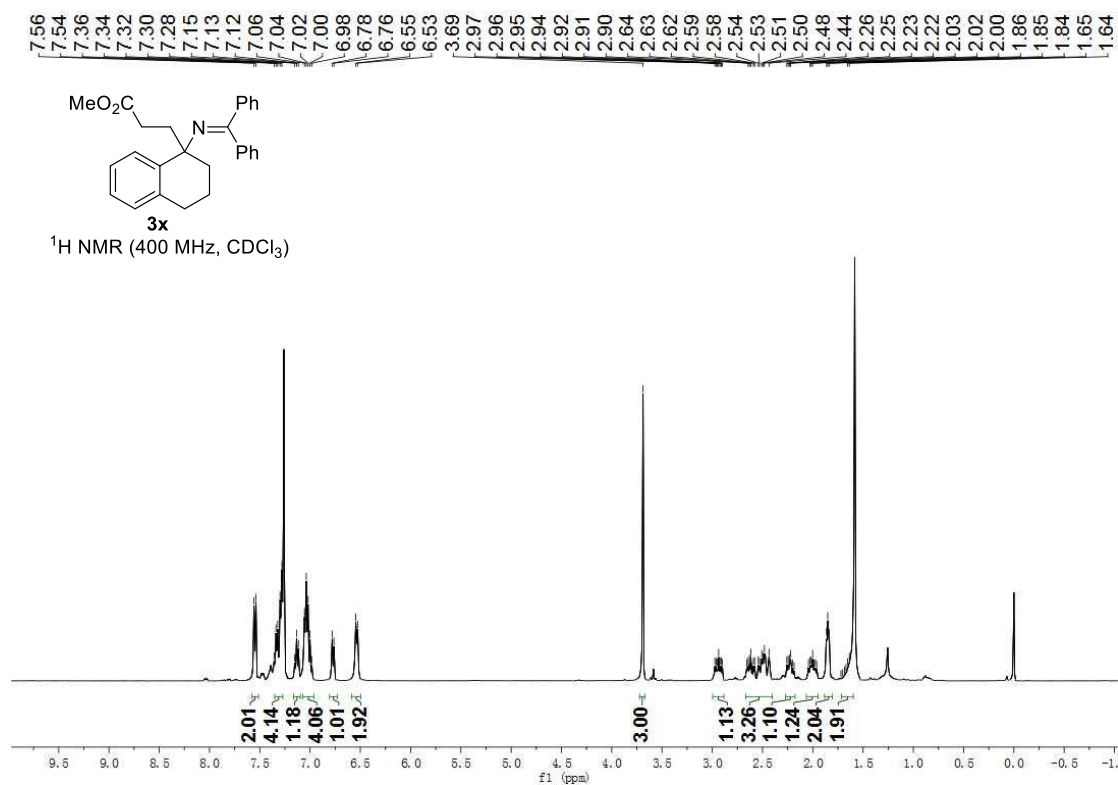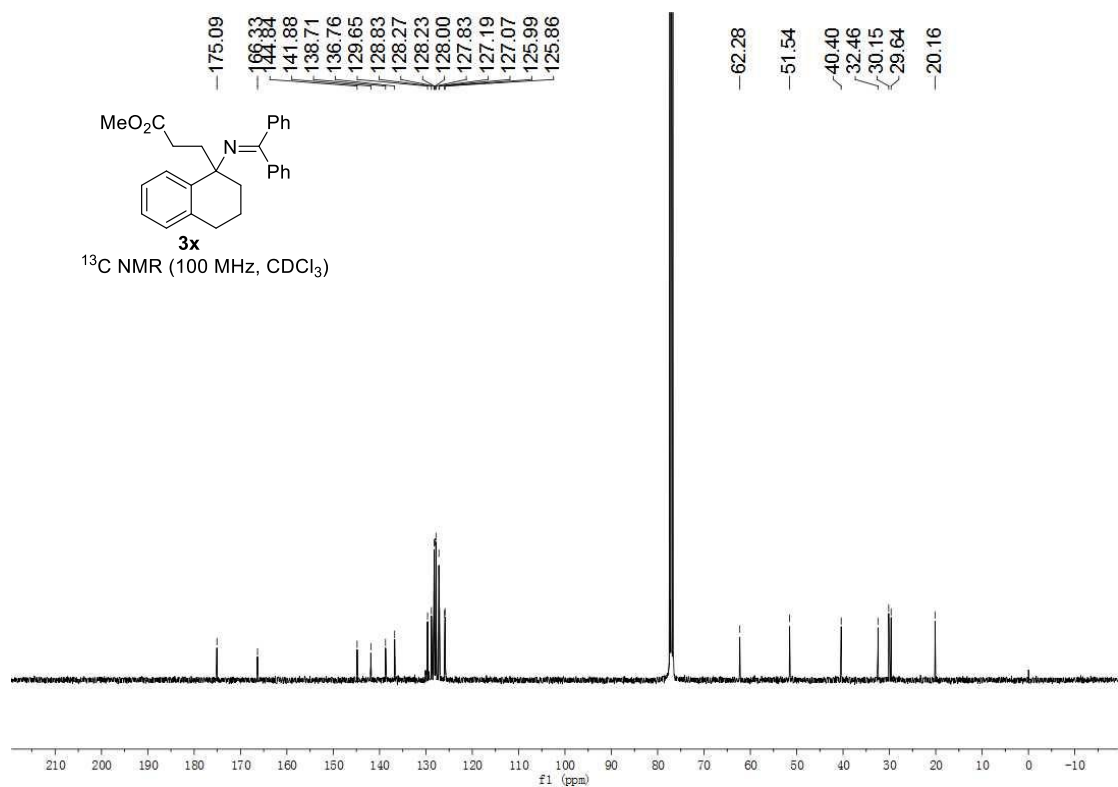

**Methyl 3-(1-((diphenylmethylene)amino)-2,3-dihydro-1H-inden-1-yl)propanoate**  
**(3y)**

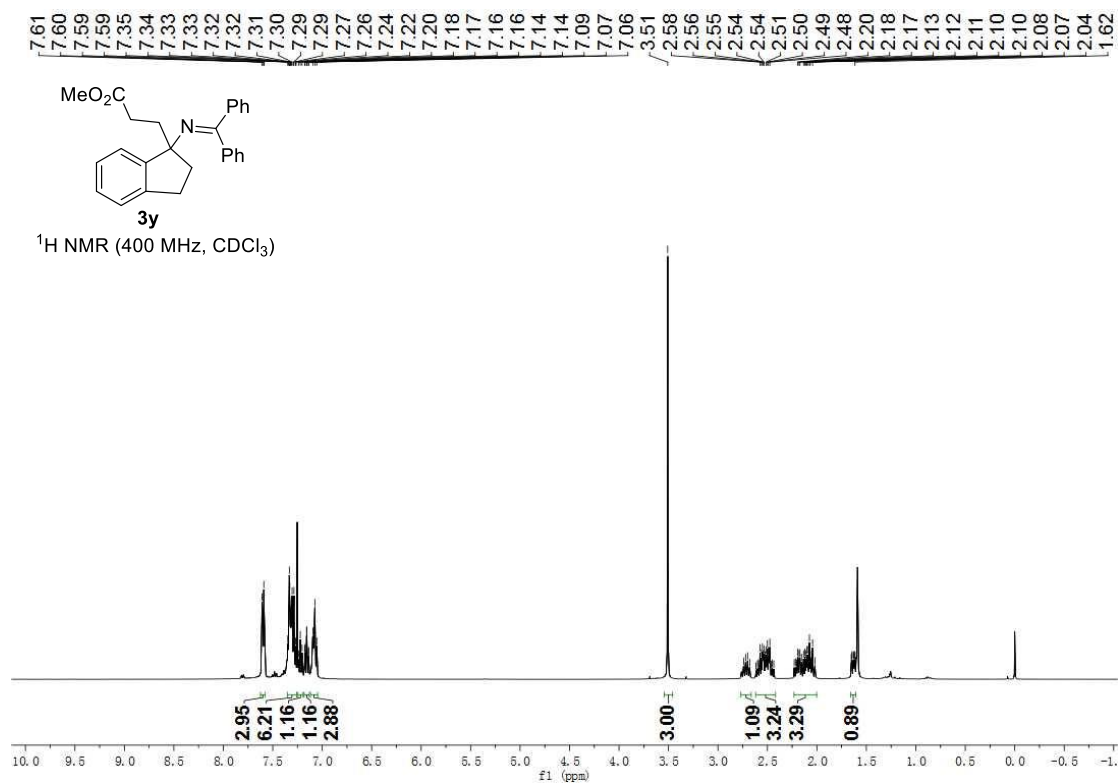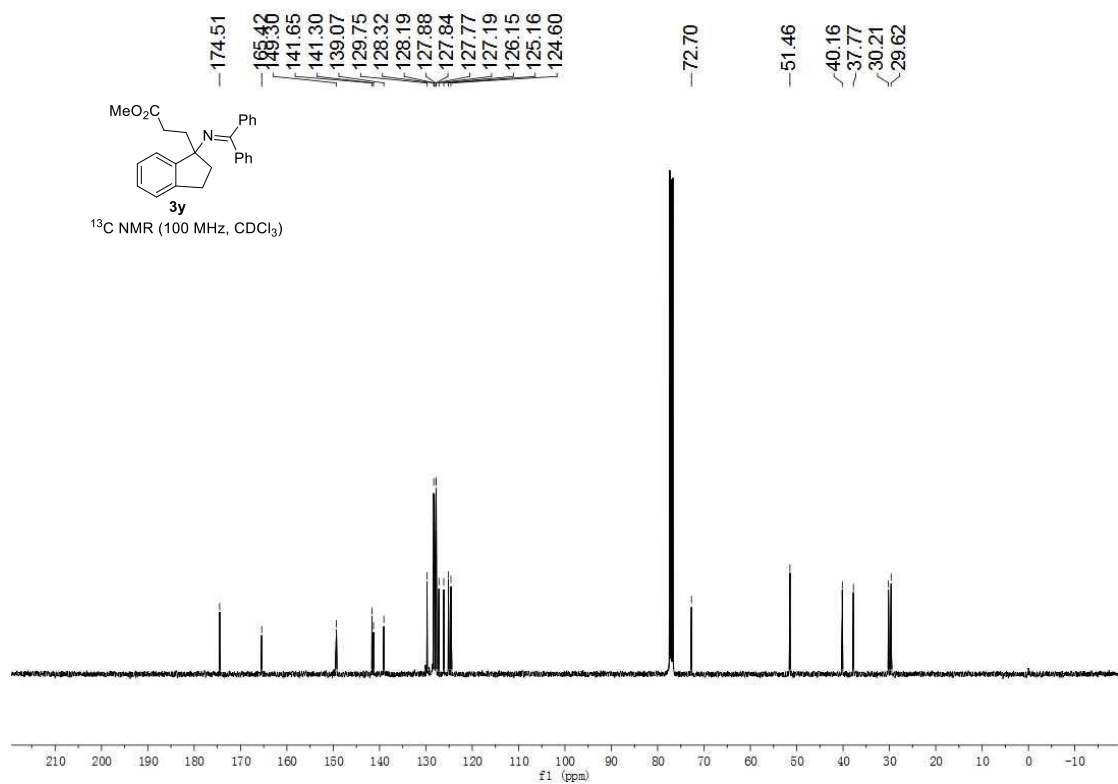

**Methyl 4-((diphenylmethylene)amino)-3-methyl-4-phenylbutanoate (3z)**

7.69  
7.67  
7.41  
7.40  
7.39  
7.39  
7.38  
7.36  
7.36  
7.35  
7.34  
7.33  
7.32  
7.27  
7.25  
7.25  
7.23  
7.22  
7.20  
7.19  
6.98  
6.97  
6.96  
4.21  
4.19  
4.12  
4.10  
3.56  
3.54  
2.58  
2.57  
2.56  
2.54  
2.53  
2.52  
2.34  
2.33  
2.30  
2.29  
2.19  
2.18  
2.01  
1.99  
1.97  
1.95  
0.95  
0.78  
0.76

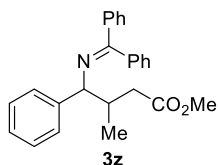

<sup>1</sup>H NMR (400 MHz, CDCl<sub>3</sub>)

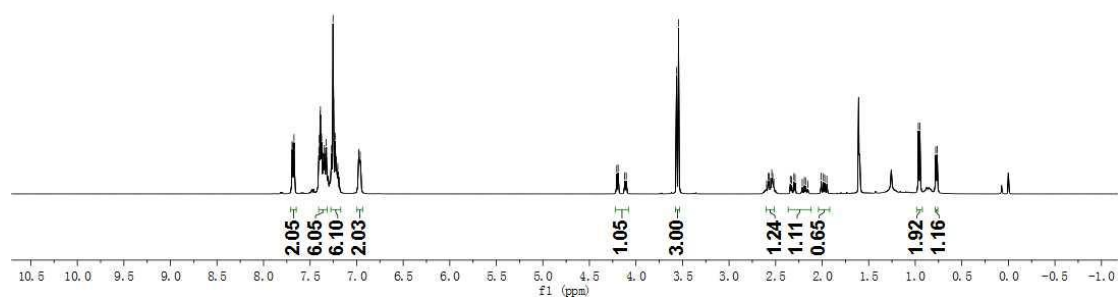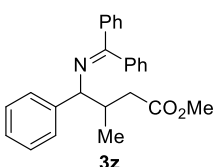

<sup>13</sup>C NMR (100 MHz, CDCl<sub>3</sub>)

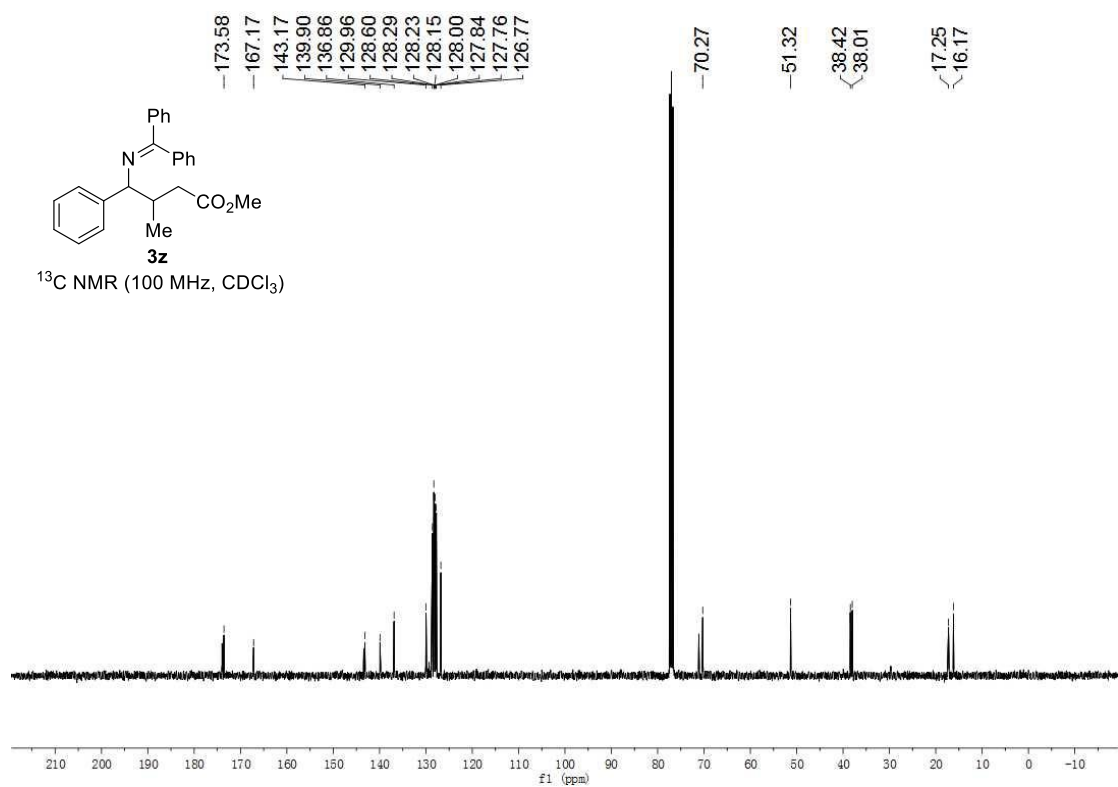

*Methyl 4-((diphenylmethylene)amino)-3,4-diphenylbutanoate (3aa)*

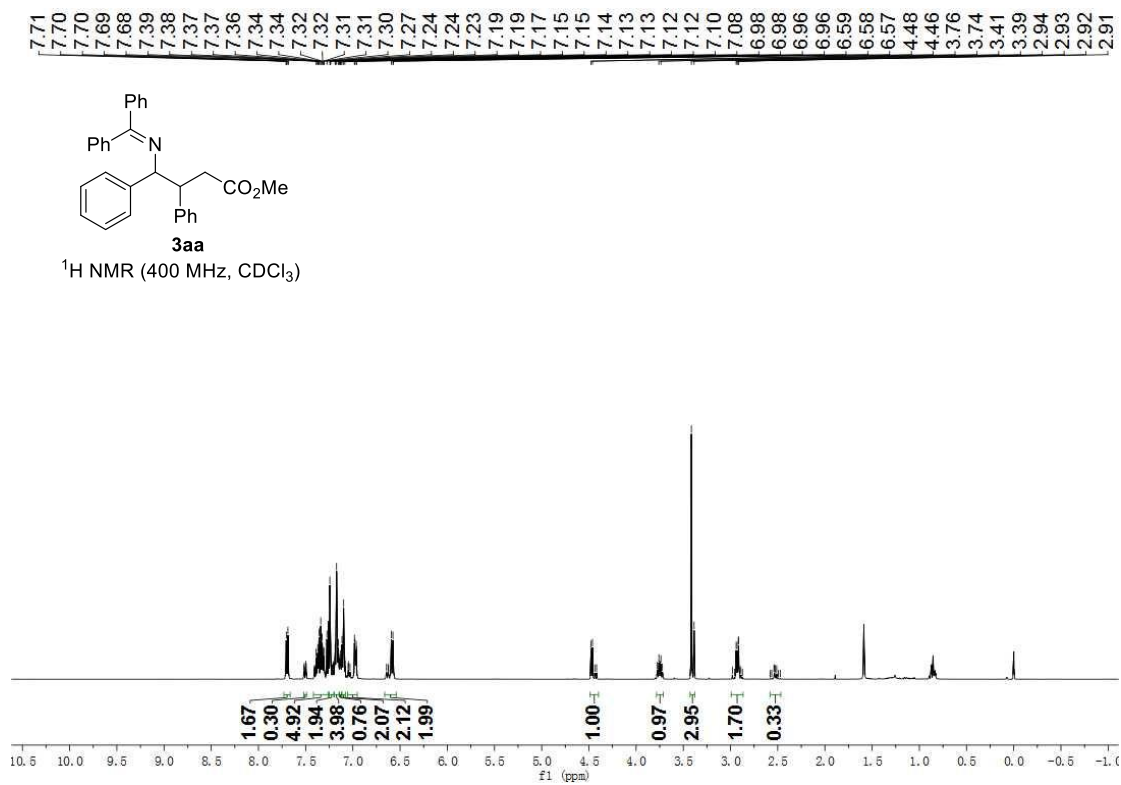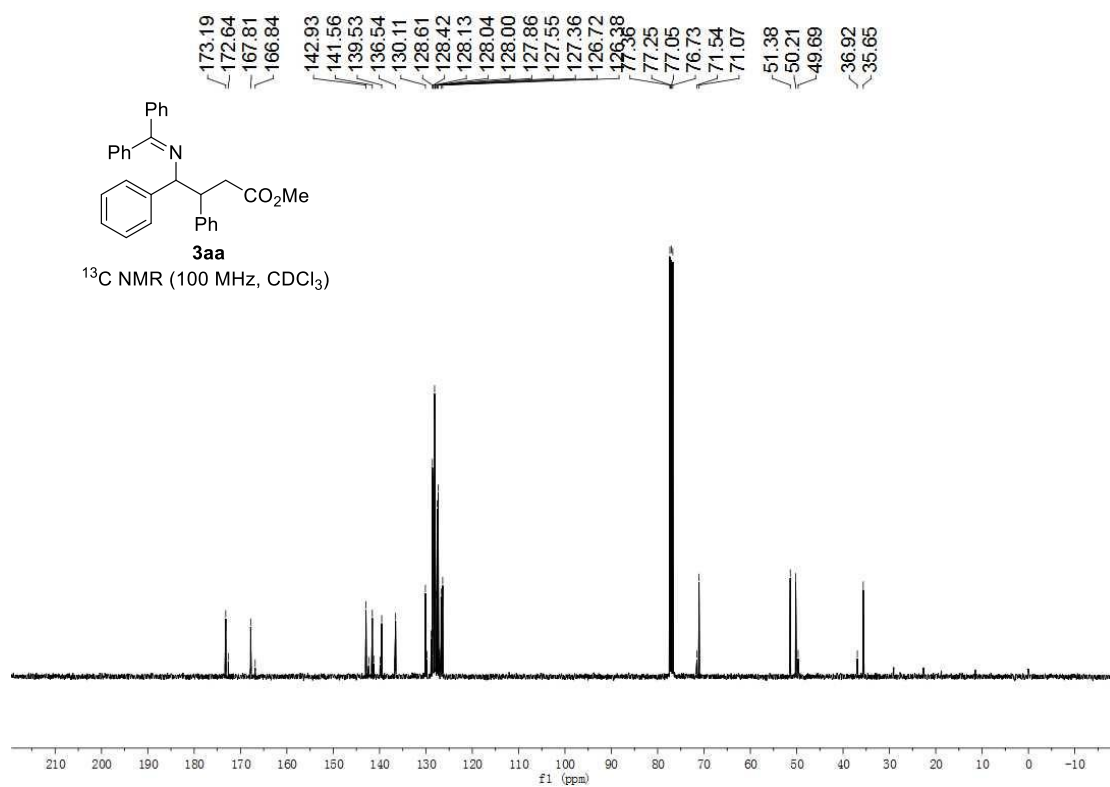

**Methyl 2-(1-((diphenylmethylene)amino)-1,2,3,4-tetrahydronaphthalen-2-yl)acetate**  
**(3ab, major diastereomer)**

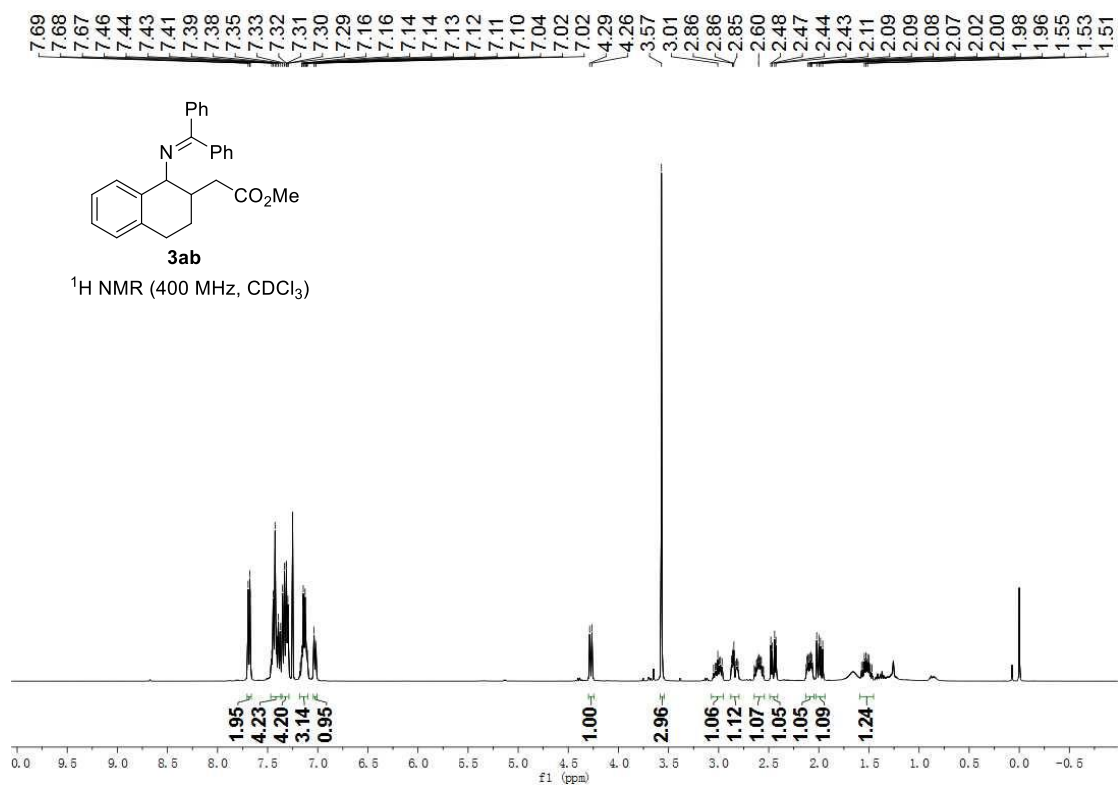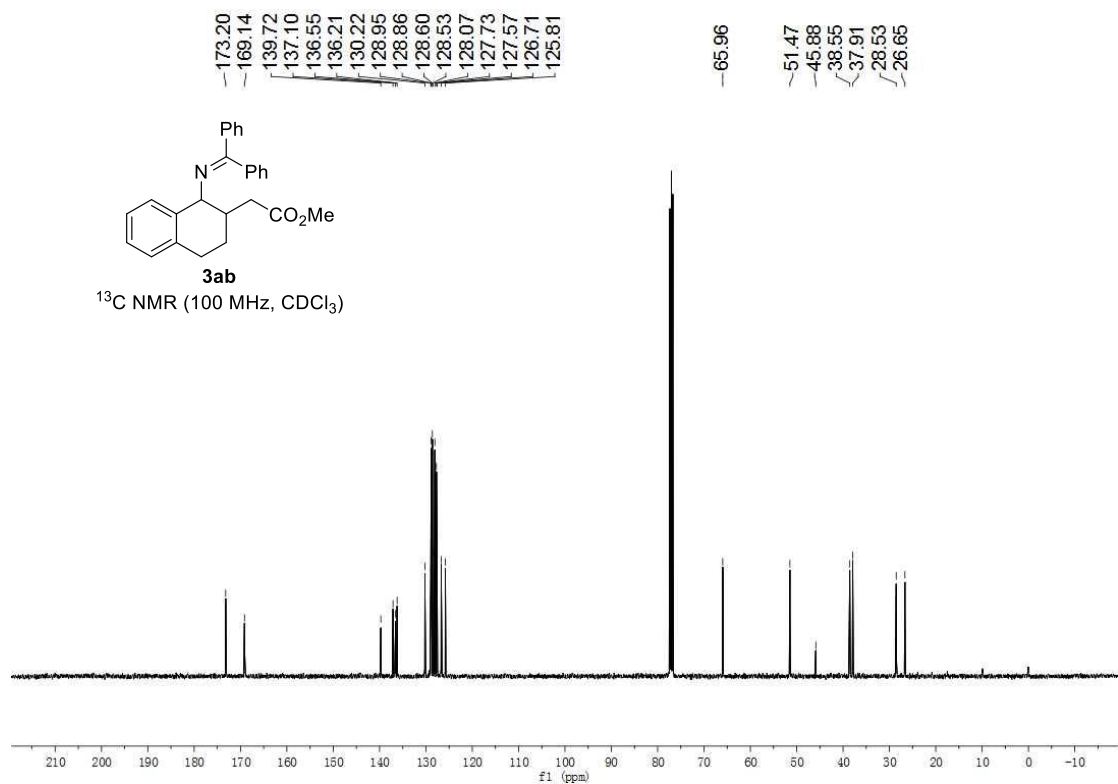

*Methyl 2-(1-((diphenylmethylene)amino)-1,2,3,4-tetrahydronaphthalen-2-yl)acetate*  
**(3ab, minor diastereomer)**

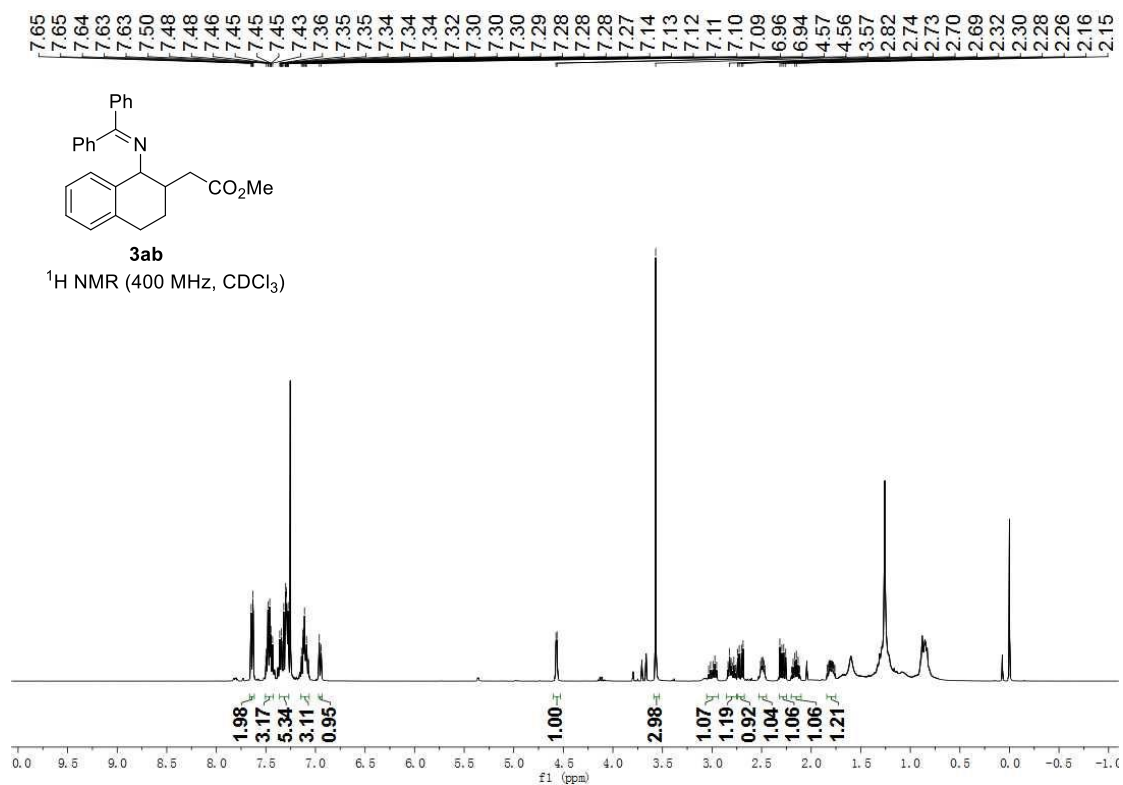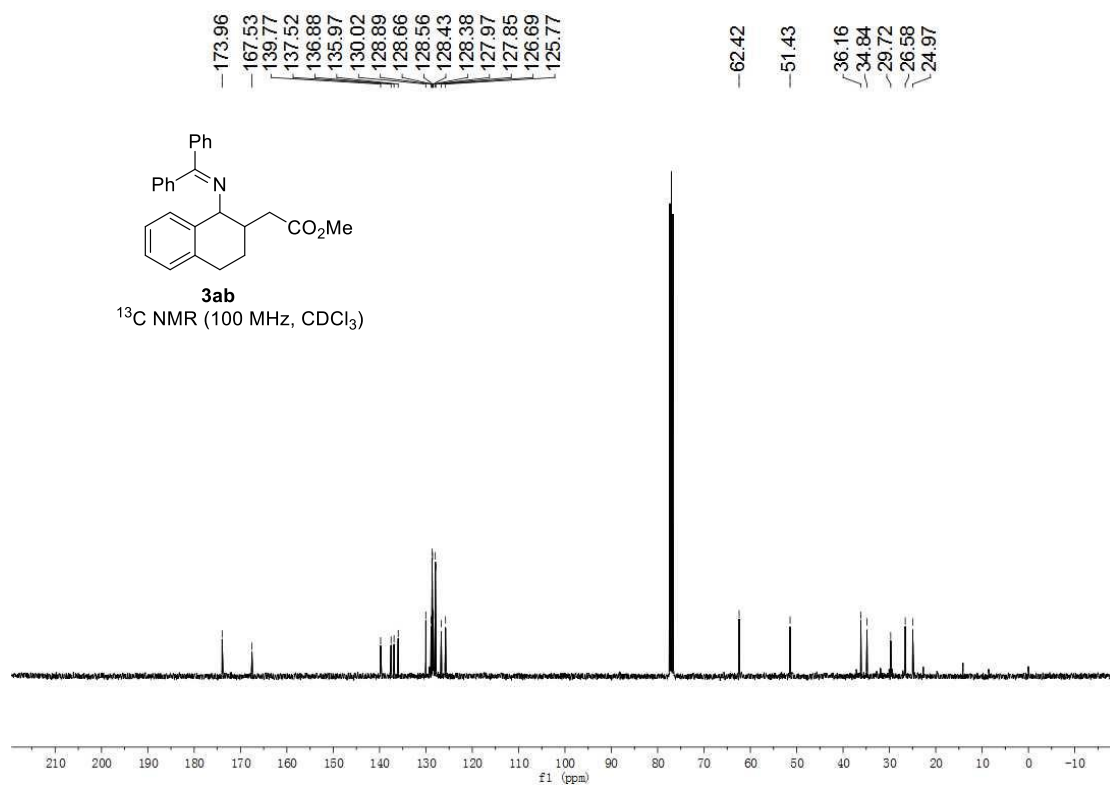

*Methyl 2-(1-((diphenylmethylene)amino)-2,3-dihydro-1H-inden-2-yl)acetate (3ac, major diastereomer)*

7.70  
7.68  
7.67  
7.47  
7.45  
7.43  
7.43  
7.41  
7.39  
7.37  
7.35  
7.33  
7.31  
7.30  
7.29  
7.28  
7.22  
7.20  
7.19  
7.18  
7.17  
7.16  
7.06  
7.05  
7.04  
4.65  
4.63  
3.62  
3.31  
3.29  
3.27  
3.26  
3.12  
3.11  
3.10  
3.09  
3.08  
3.07  
2.64  
2.62  
2.60  
2.58  
2.57  
2.56  
2.53  
2.52  
2.31  
2.28  
2.27  
2.25

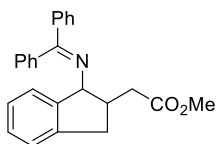

<sup>1</sup>H NMR (400 MHz, CDCl<sub>3</sub>)

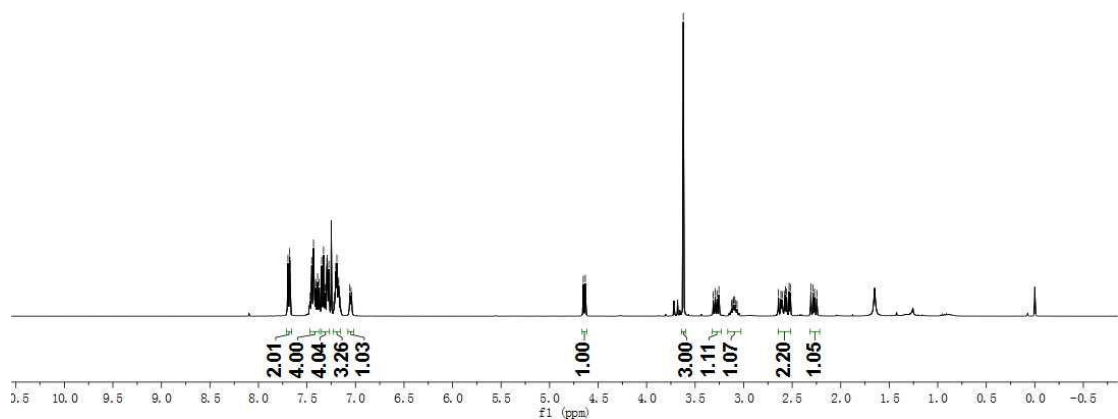

173.01  
169.73  
144.21  
142.21  
139.63  
136.76  
130.23  
128.80  
128.64  
128.52  
128.08  
127.40  
126.53  
124.61  
123.67  
72.00  
51.56  
45.67  
37.16  
37.04

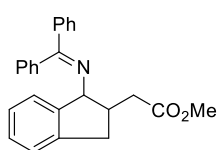

<sup>13</sup>C NMR (100 MHz, CDCl<sub>3</sub>)

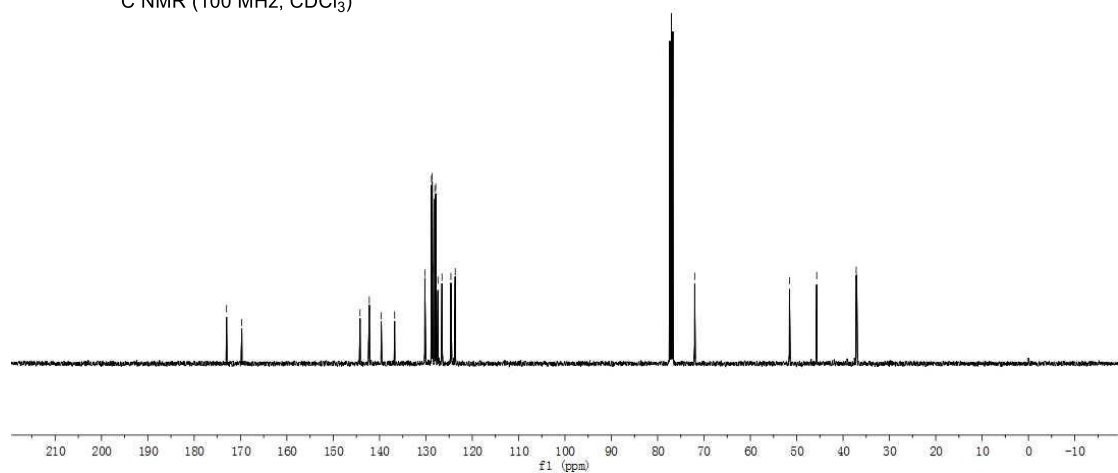

**Methyl 2-(2-((diphenylmethylene)amino)-2,3-dihydro-1H-inden-1-yl)acetate (3ac, minor diastereomer)**

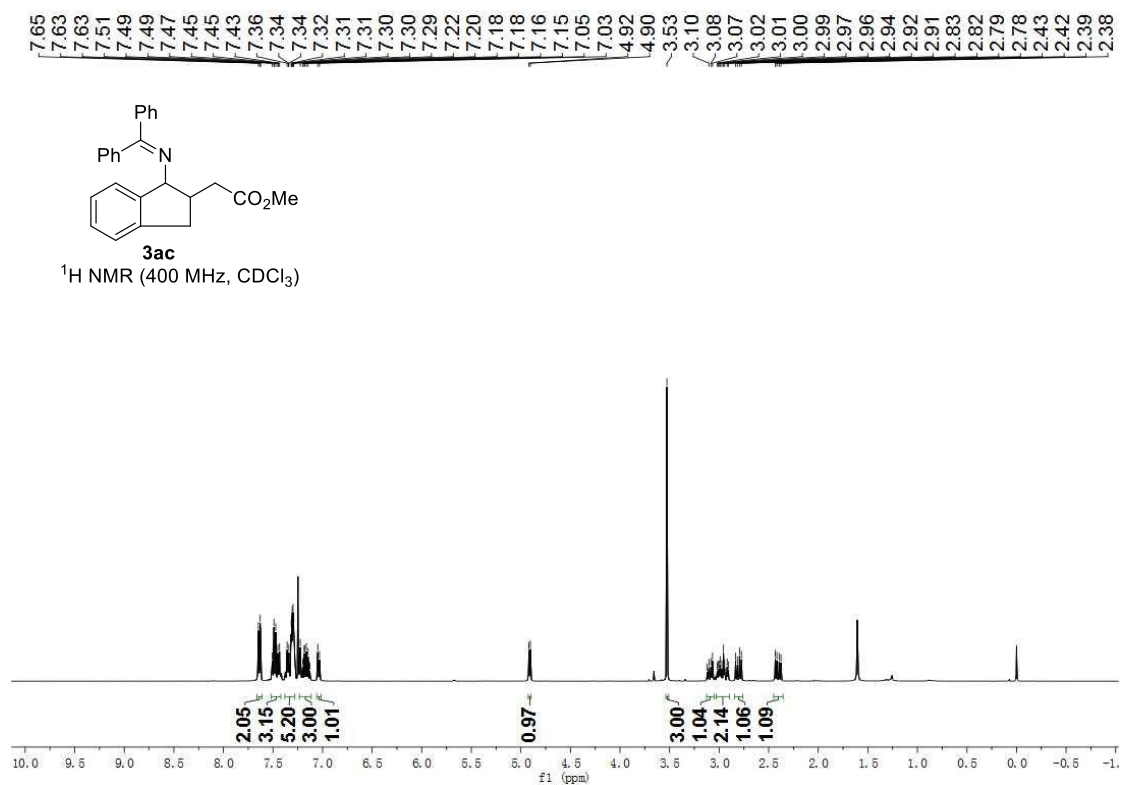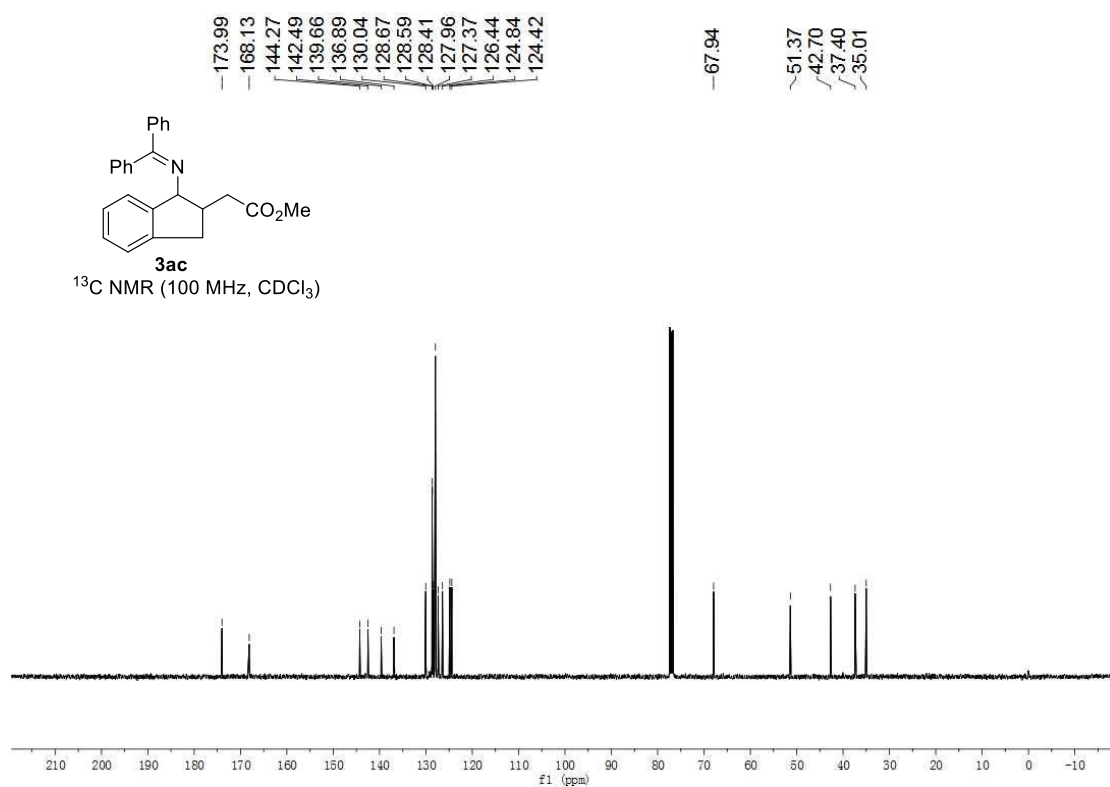



*Methyl 4-((diphenylmethylene)amino)-5-phenylpentanoate (3ad)*

7.57  
7.55  
7.36  
7.34  
7.33  
7.31  
7.29  
7.27  
7.24  
7.19  
7.17  
7.16  
7.14  
7.00  
6.98  
6.52  
6.50  
3.57  
3.48  
3.47  
3.46  
3.45  
3.44  
2.93  
2.91  
2.89  
2.87  
2.84  
2.83  
2.81  
2.80  
2.35  
2.34  
2.32  
2.31  
2.30  
2.26  
2.25  
2.22  
2.20  
2.06  
2.04  
2.02  
2.01  
1.96  
1.95  
1.94  
1.93  
1.91  
1.90

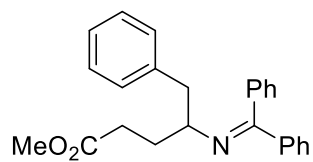

<sup>1</sup>H NMR (400MHz, CDCl<sub>3</sub>)

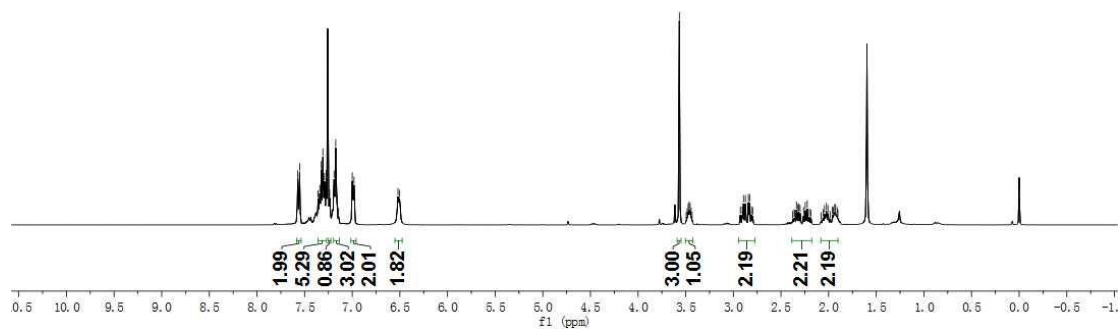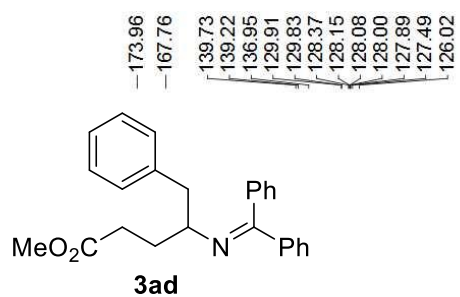

<sup>13</sup>C NMR (100MHz, CDCl<sub>3</sub>)

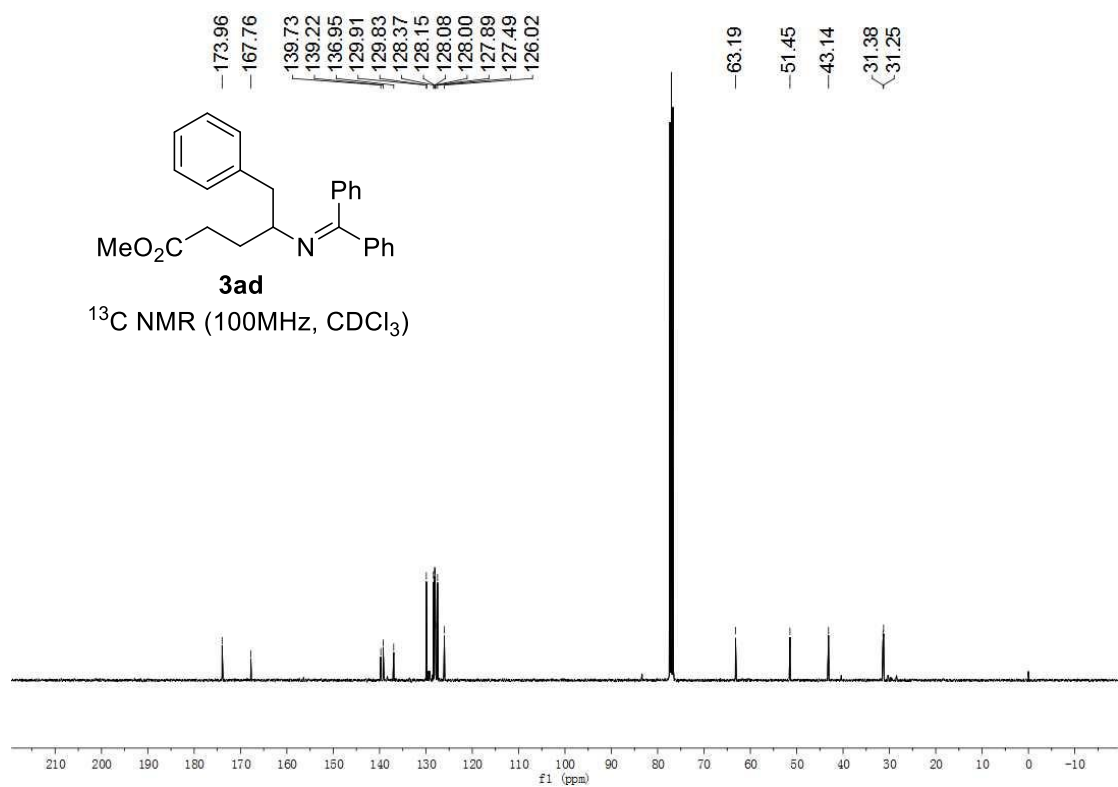

*Methyl 4-((diphenylmethylene)amino)-5-(o-tolyl)pentanoate (3ae)*

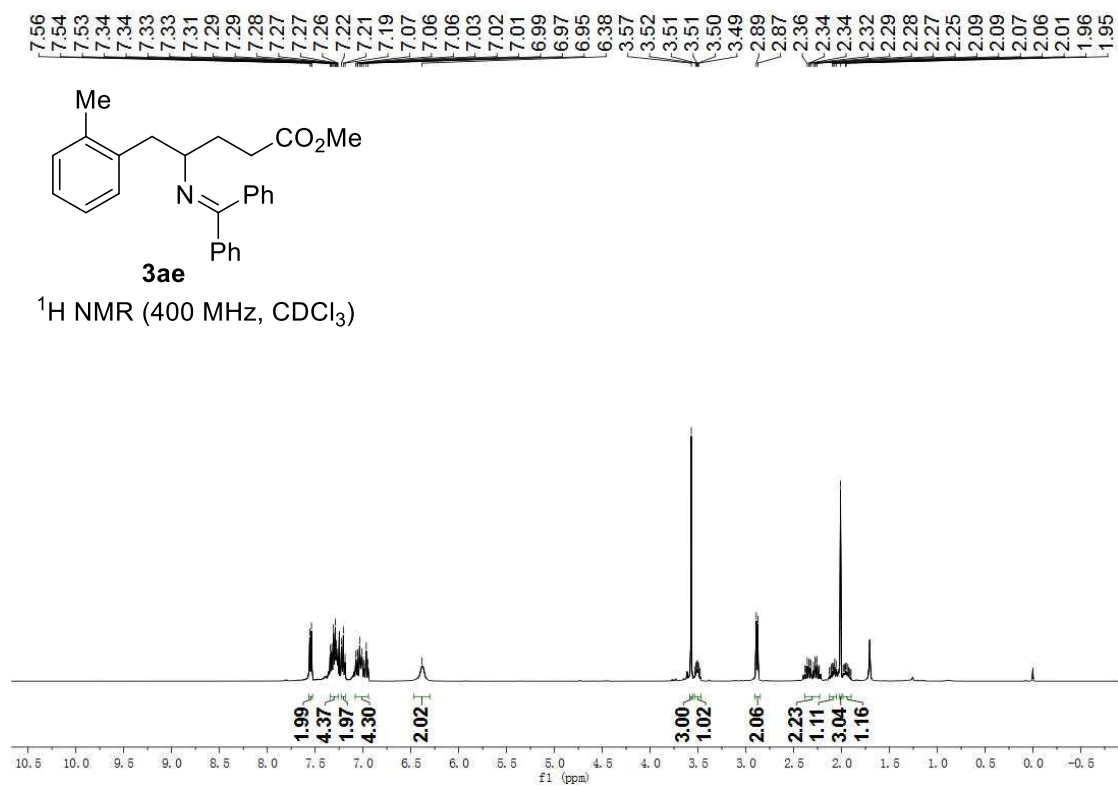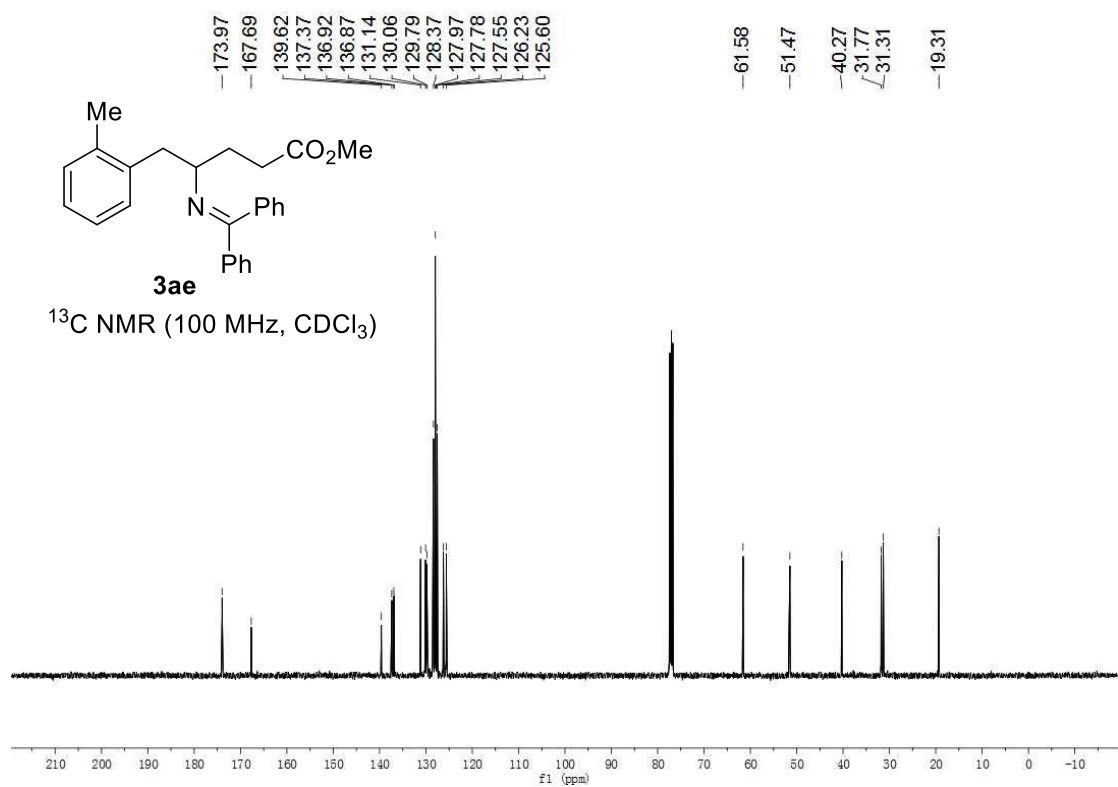

*Methyl 4-((diphenylmethylene)amino)-6-phenylhexanoate (3af)*

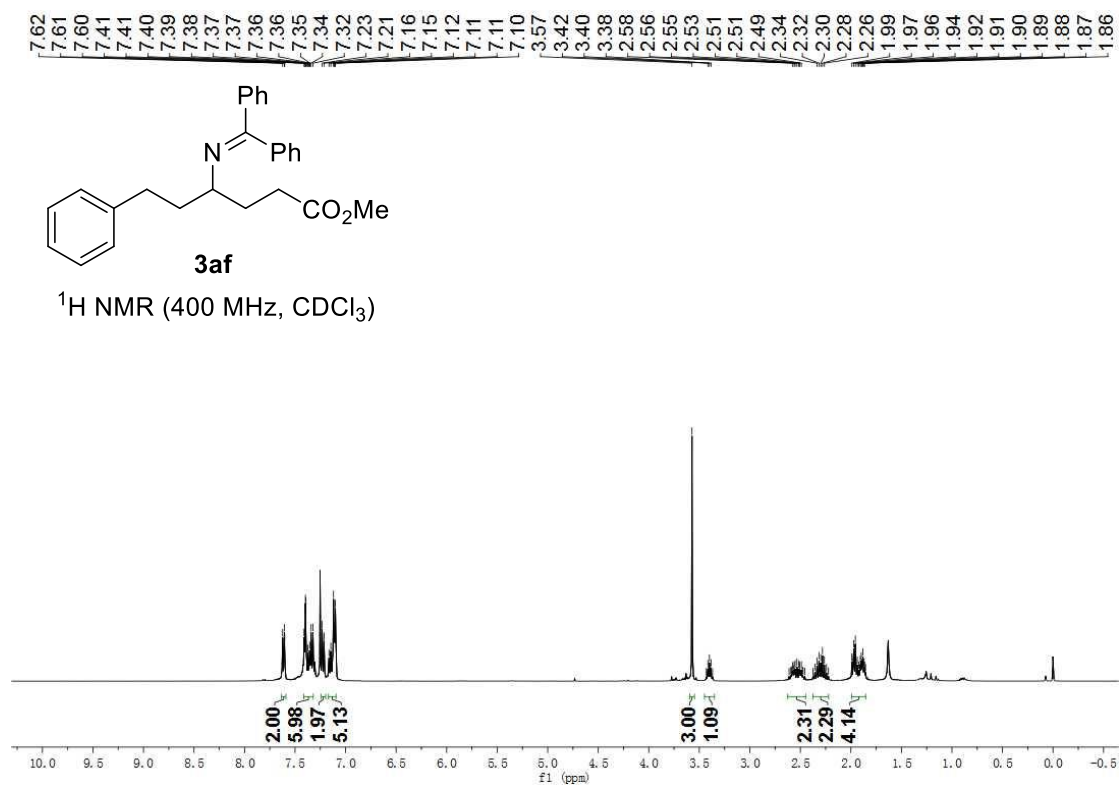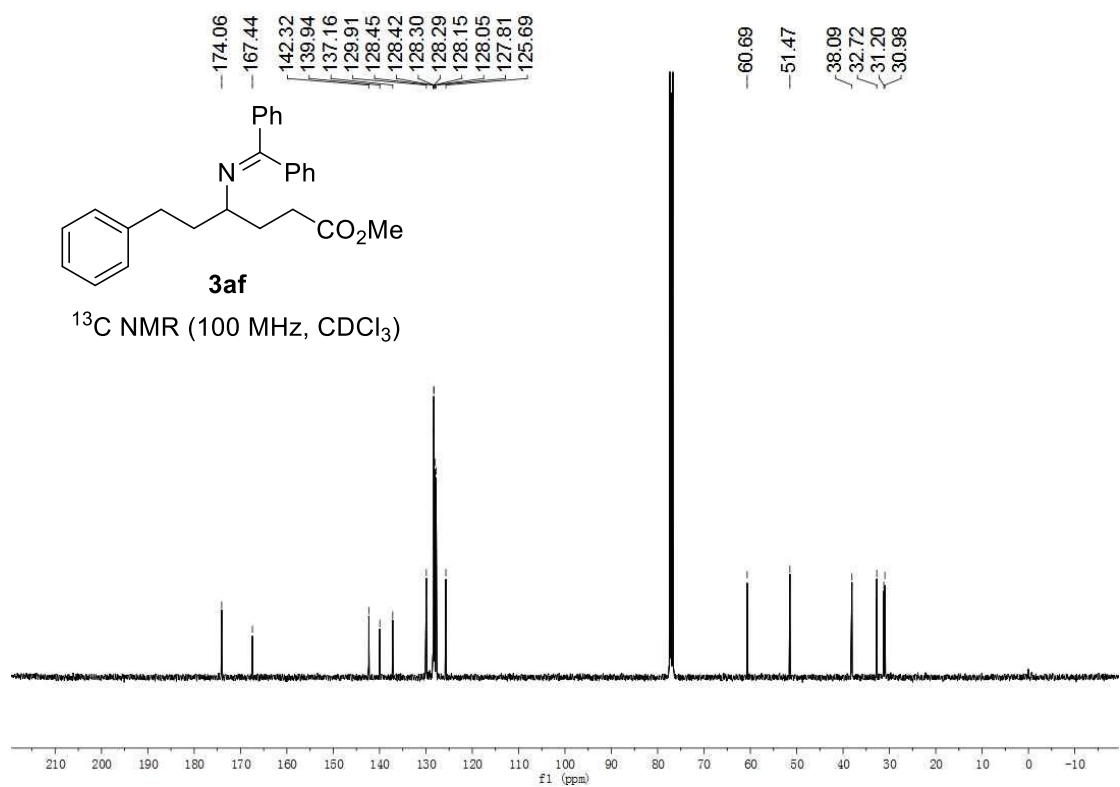

*Methyl 4-(benzyloxy)-4-((diphenylmethylene)amino)butanoate (3ag)*

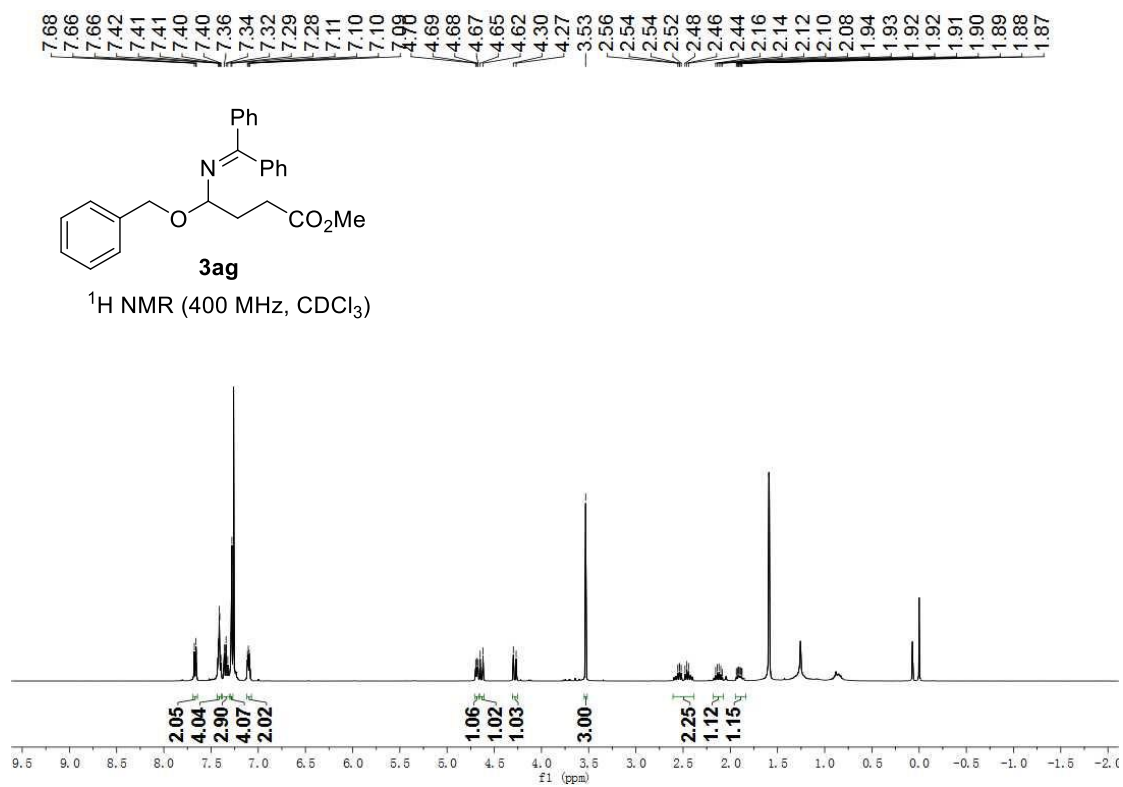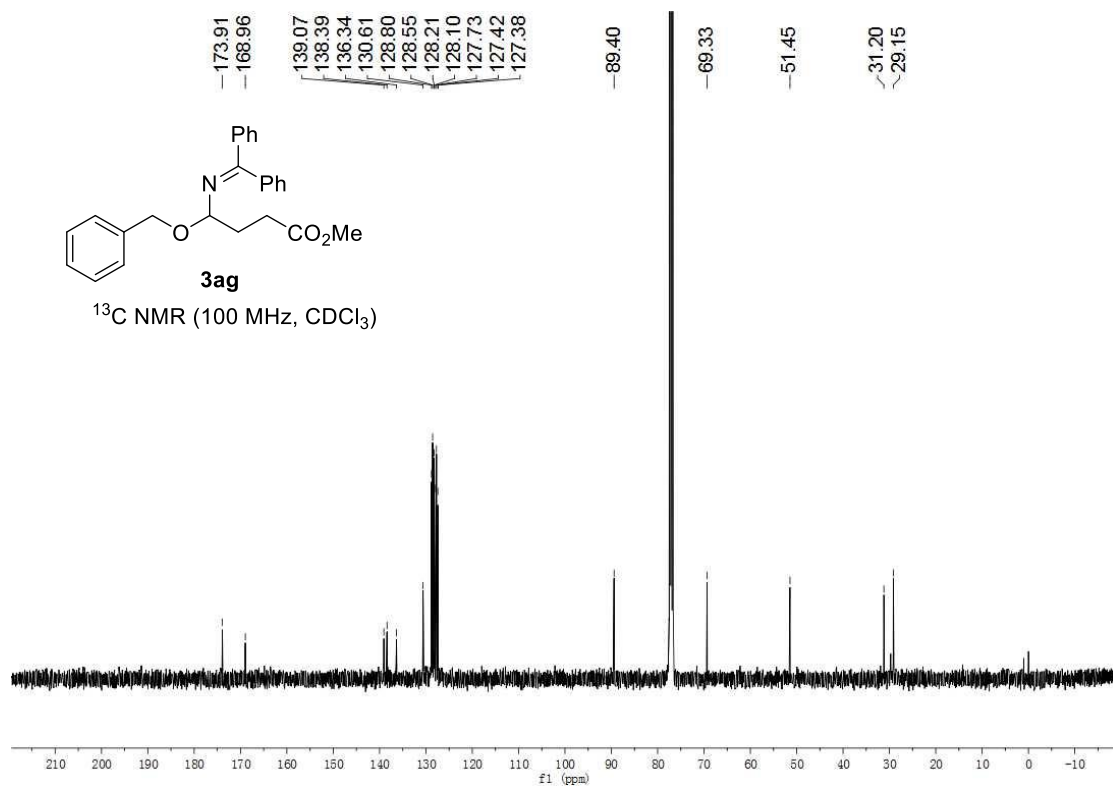

*Dimethyl 4-((diphenylmethylene)amino)tridecanedioate (3ah)*

7.60  
7.60  
7.59  
7.58  
7.58  
7.57  
7.43  
7.43  
7.43  
7.42  
7.41  
7.41  
7.40  
7.40  
7.39  
7.36  
7.34  
7.34  
7.34  
7.34  
7.33  
7.32  
7.31  
7.31  
7.29  
7.14  
7.14  
7.13  
7.13  
7.12  
7.11  
3.66  
3.58  
3.29  
2.31  
2.29  
2.27  
2.27  
2.25  
2.23  
1.91  
1.89  
1.72  
1.62  
1.60  
1.58  
1.54  
1.53  
1.53  
1.26  
1.24  
1.21

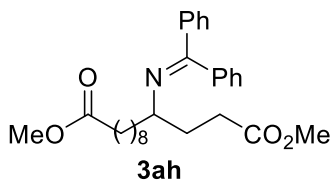

<sup>1</sup>H NMR (400 MHz, CDCl<sub>3</sub>)

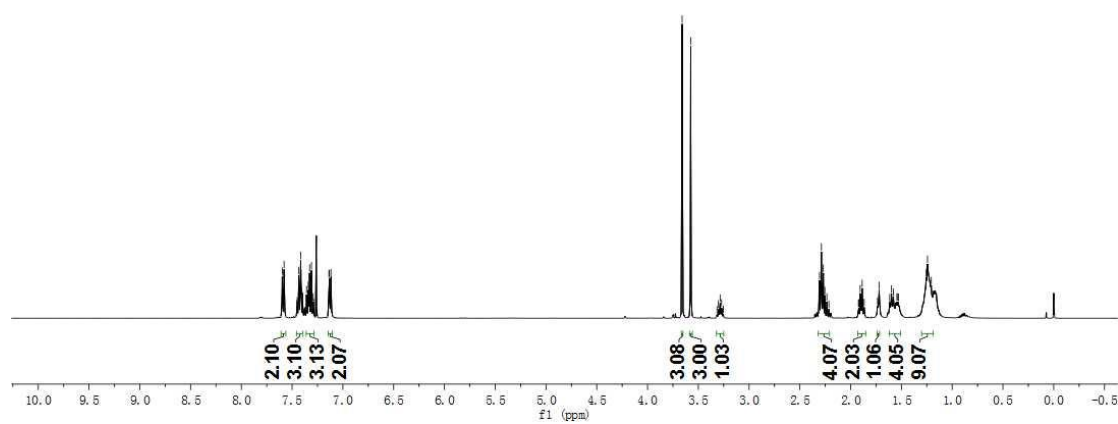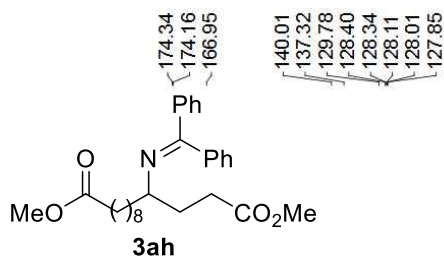

<sup>13</sup>C NMR (100 MHz, CDCl<sub>3</sub>)

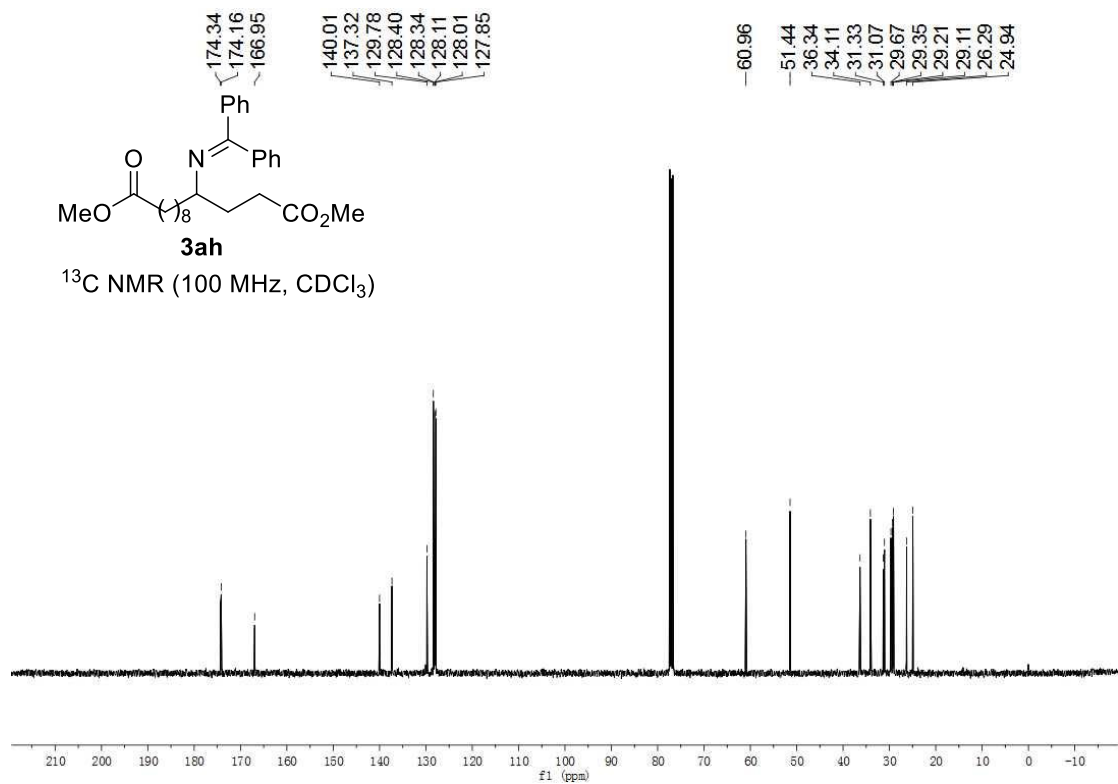

**5-Methyl 1-((1R,2R,4R)-1,7,7-trimethylbicyclo[2.2.1]heptan-2-yl) 2-((diphenylmethylene)amino)-2-methylpentanedioate (3ai)**

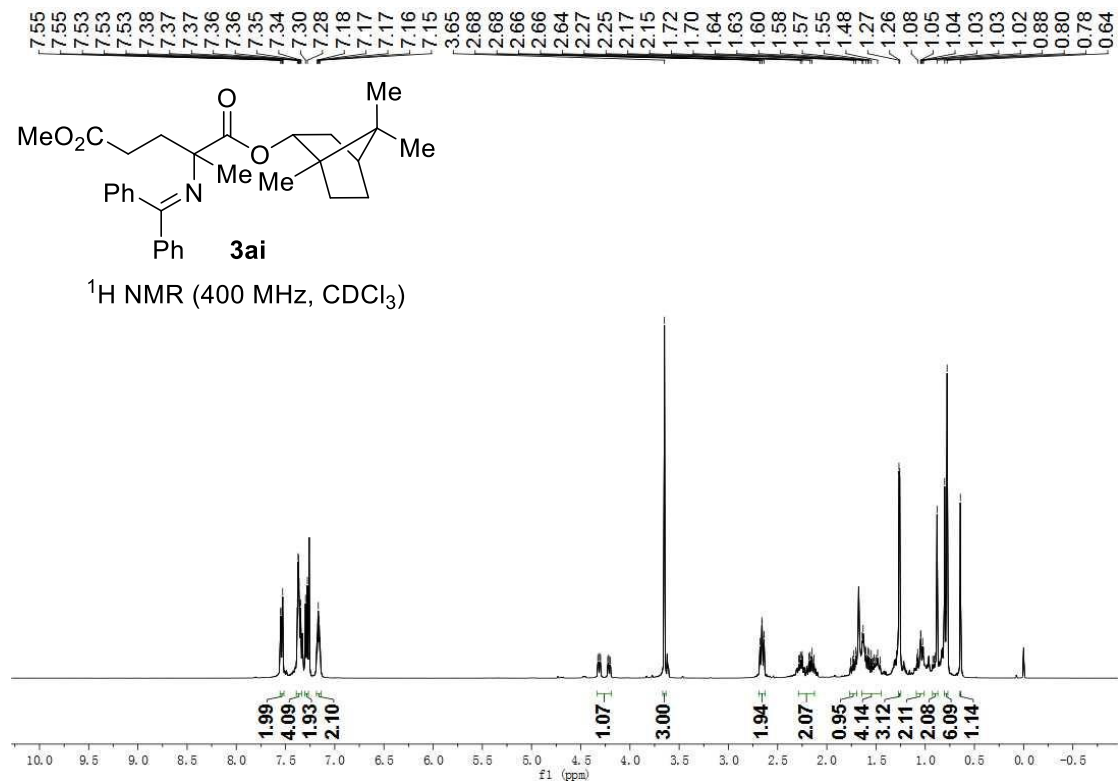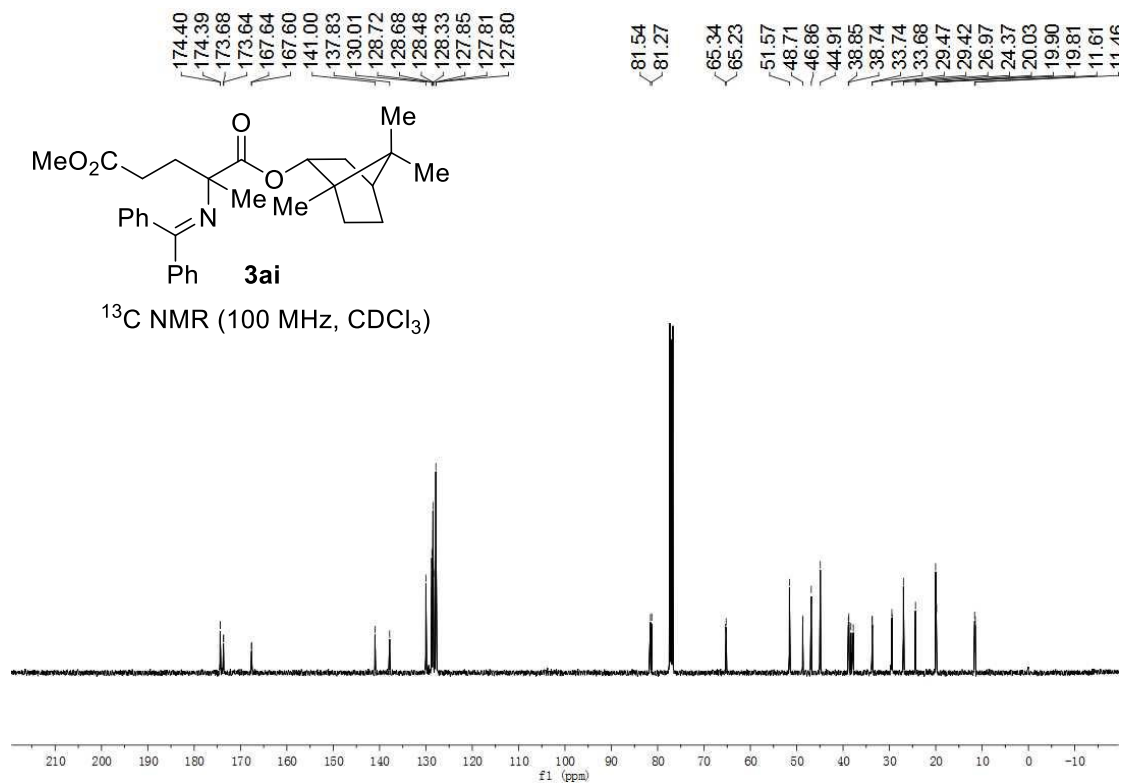

*Methyl 2-(5-((diphenylmethylene)amino)-3-hydroxy-10,13-dimethyl-17-(6-methylheptan-2-yl)hexadecahydro-1H-cyclopenta[a]phenanthren-6-yl)acetate (3aj)*

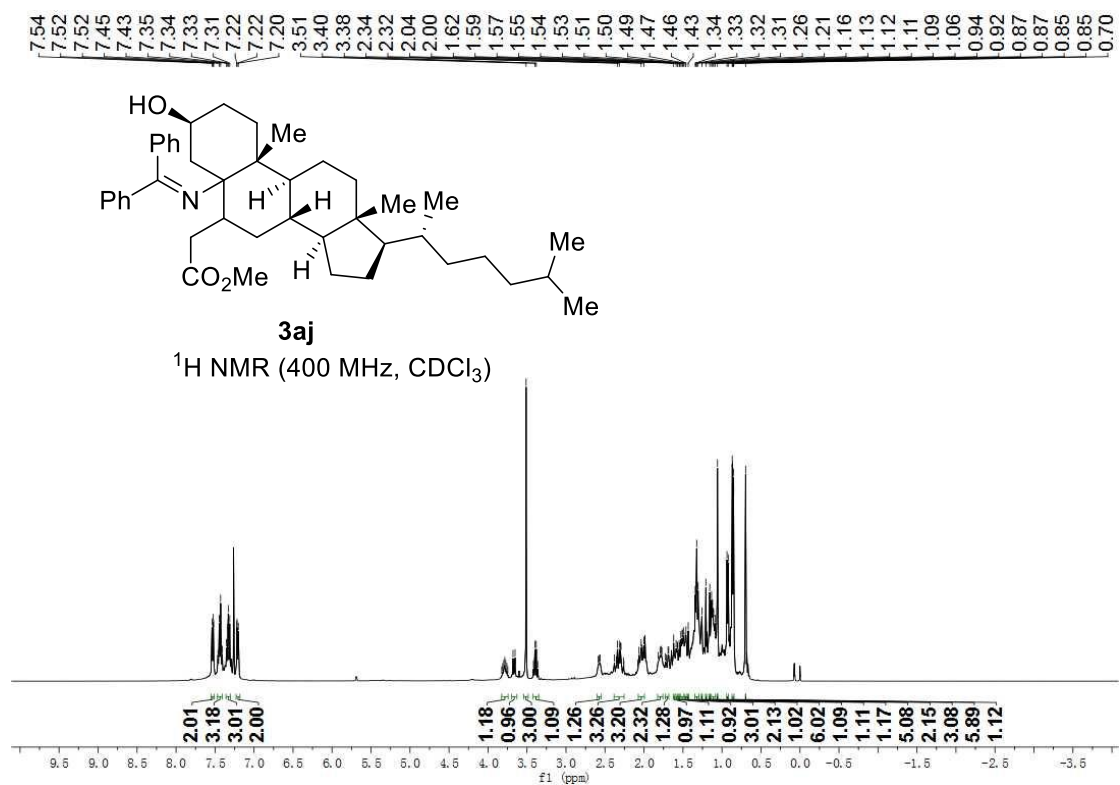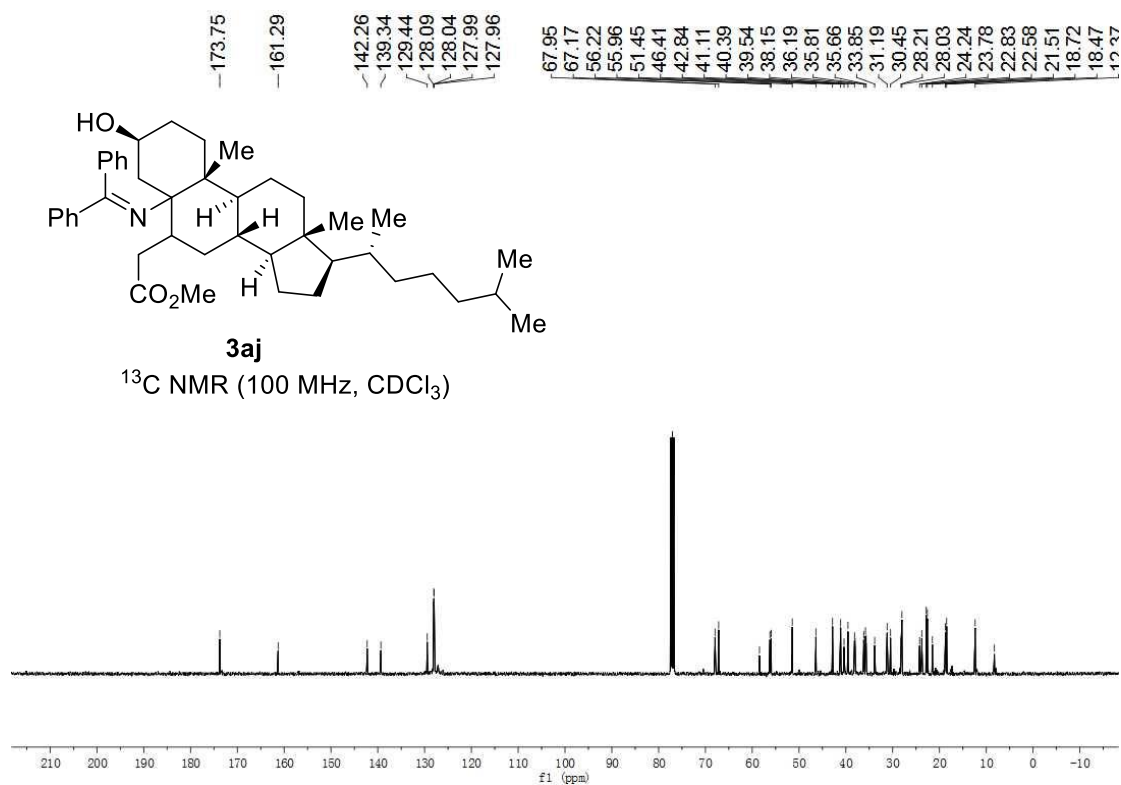

*(3R,10S,13R)*-10,13-Dimethyl-17-((*S*)-6-methylheptan-2-yl)hexadecahydro-1*H*-cyclo-penta[*a*]phenanthren-3-yl 3-(1-((diphenylmethylene)amino)-4-methoxy-4-oxobuty-l)benzoate (**3ak**)

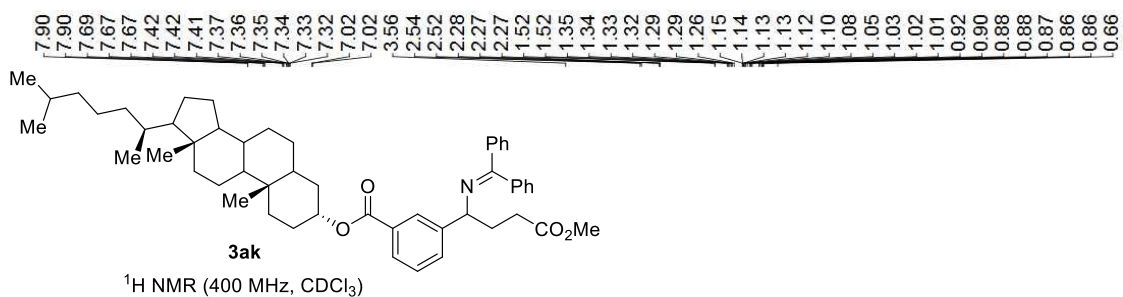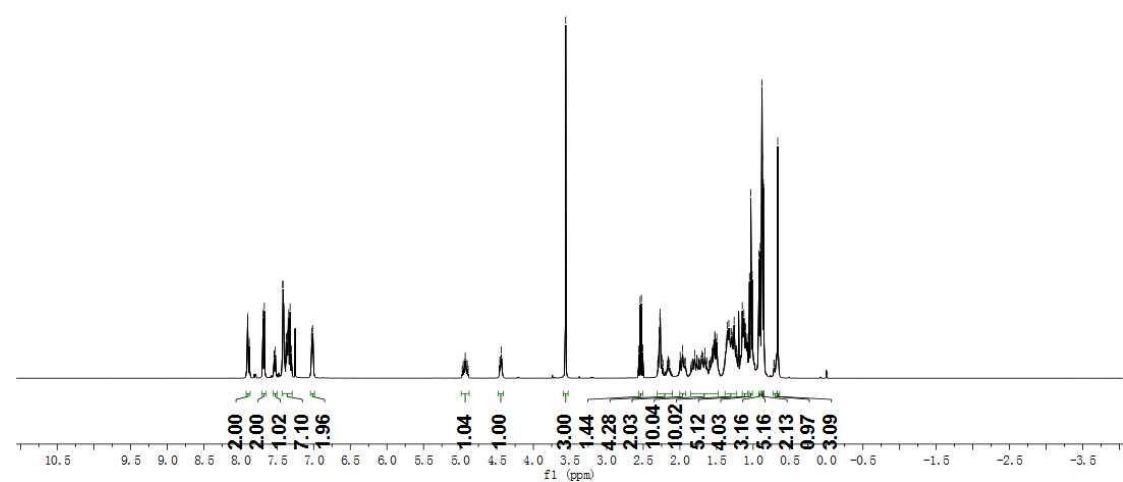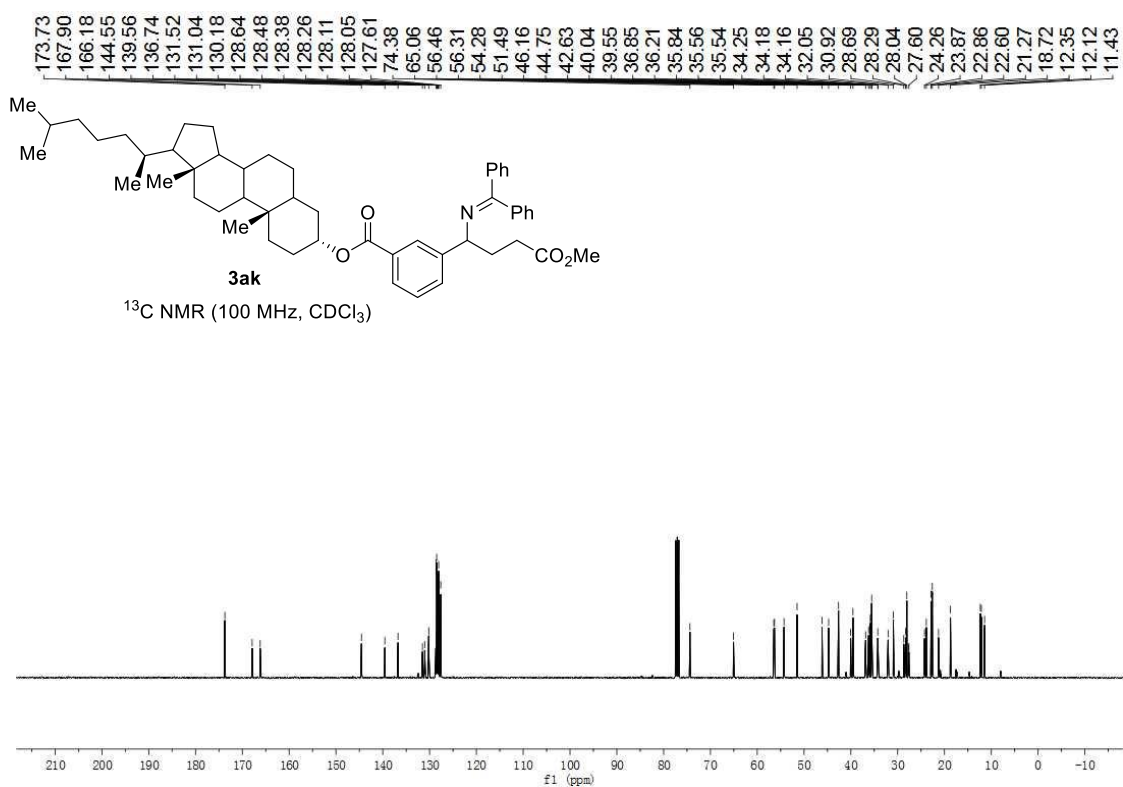



*(1S,2S,5R)-2-Isopropyl-5-methylcyclohexyl*

*3-(1-((diphenylmethylene)amino)-4-methoxy-4-oxobutyl)benzoate (3al)*

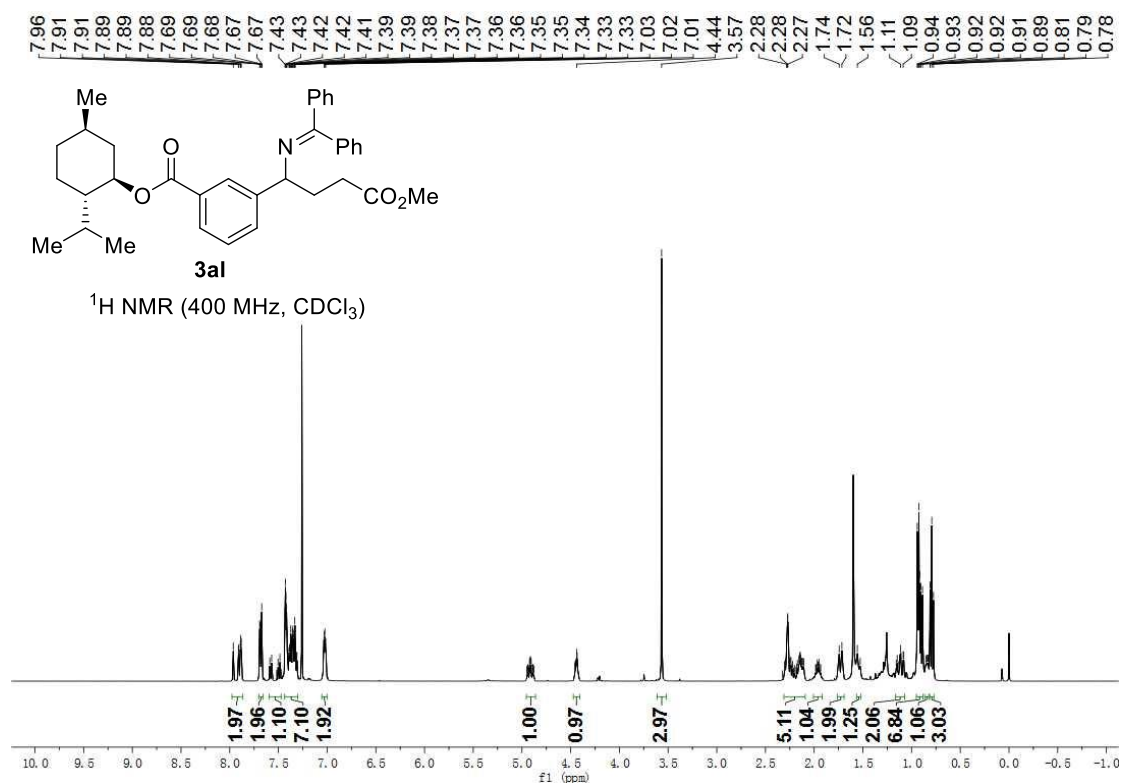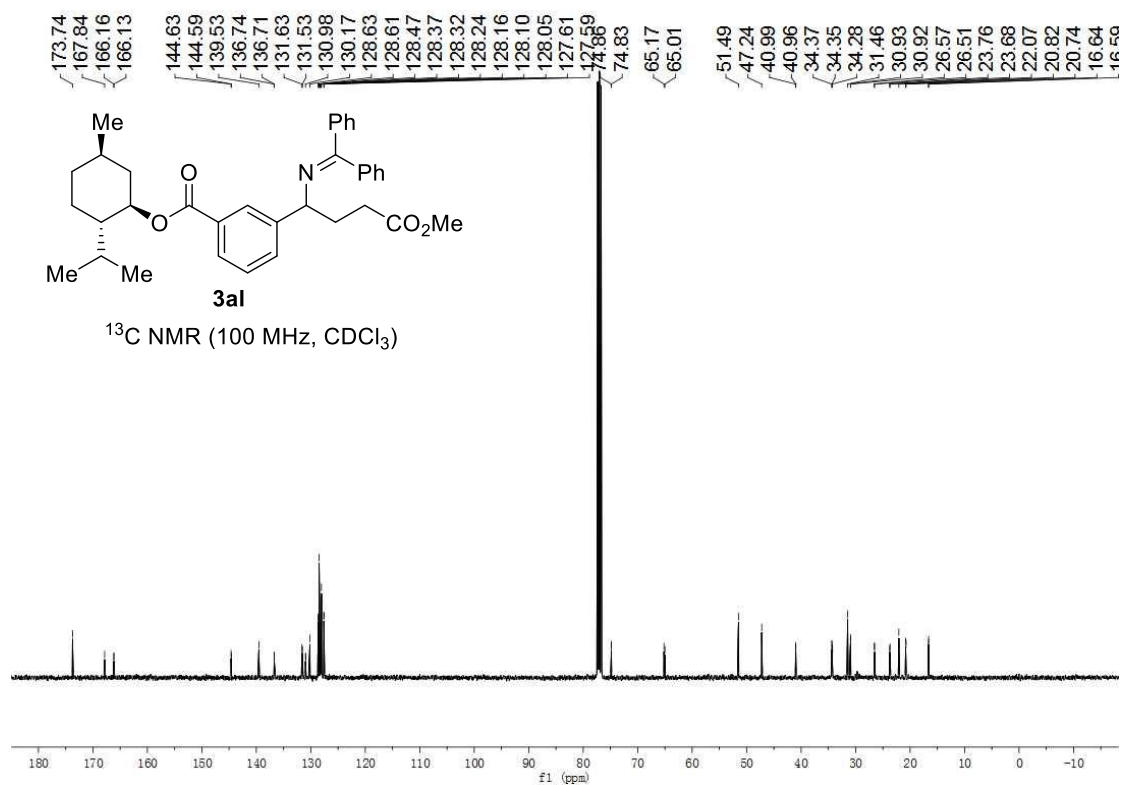

*Methyl 4-((bis(4-fluorophenyl)methylene)amino)-4-phenylbutanoate (3am)*

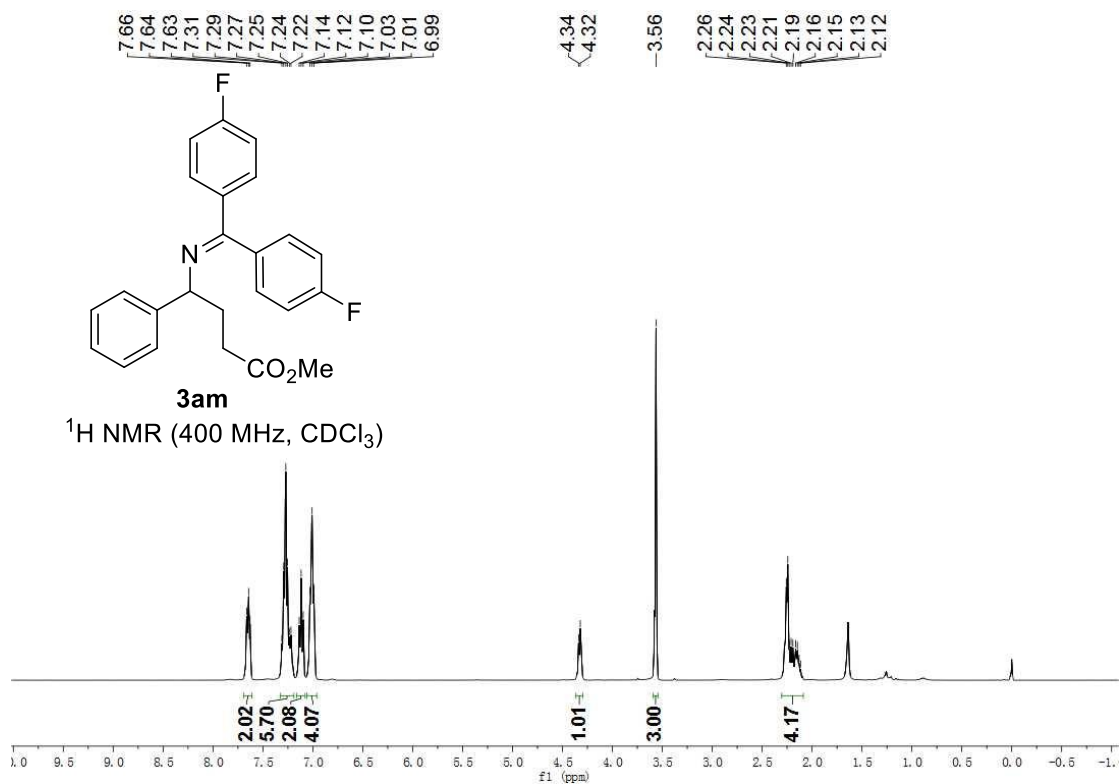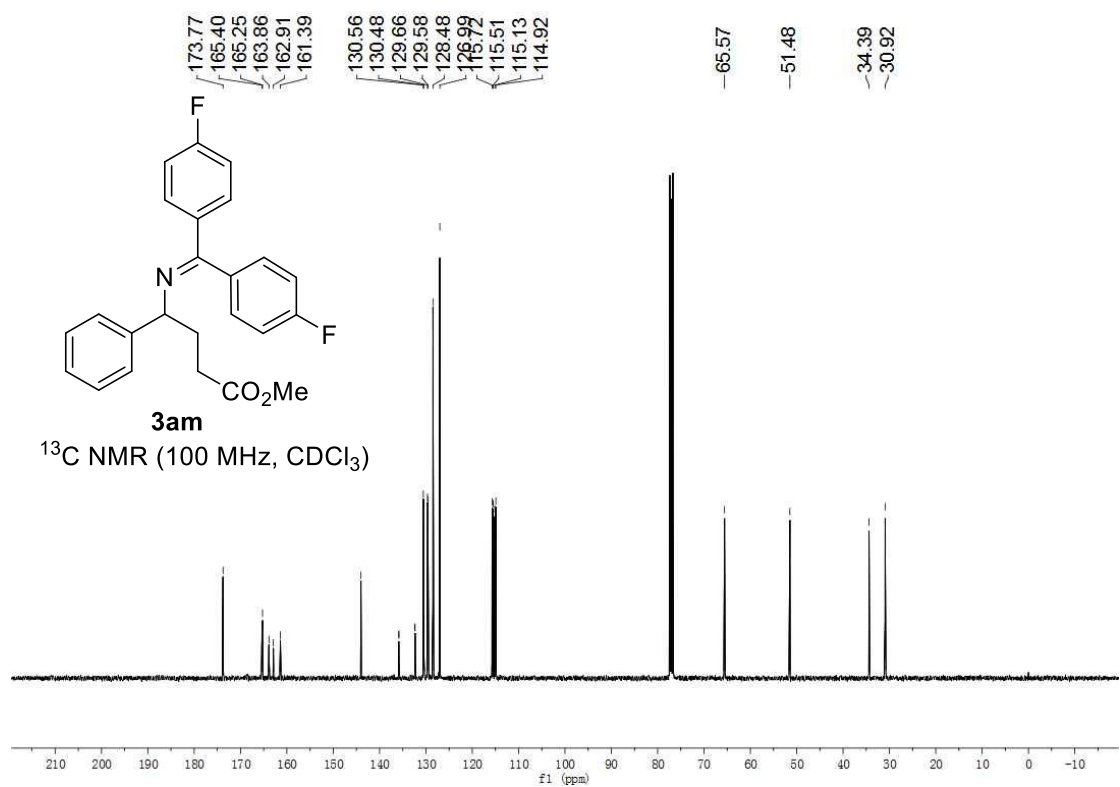

*Methyl 4-((di-p-tolylmethylene)amino)-4-phenylbutanoate (3an)*

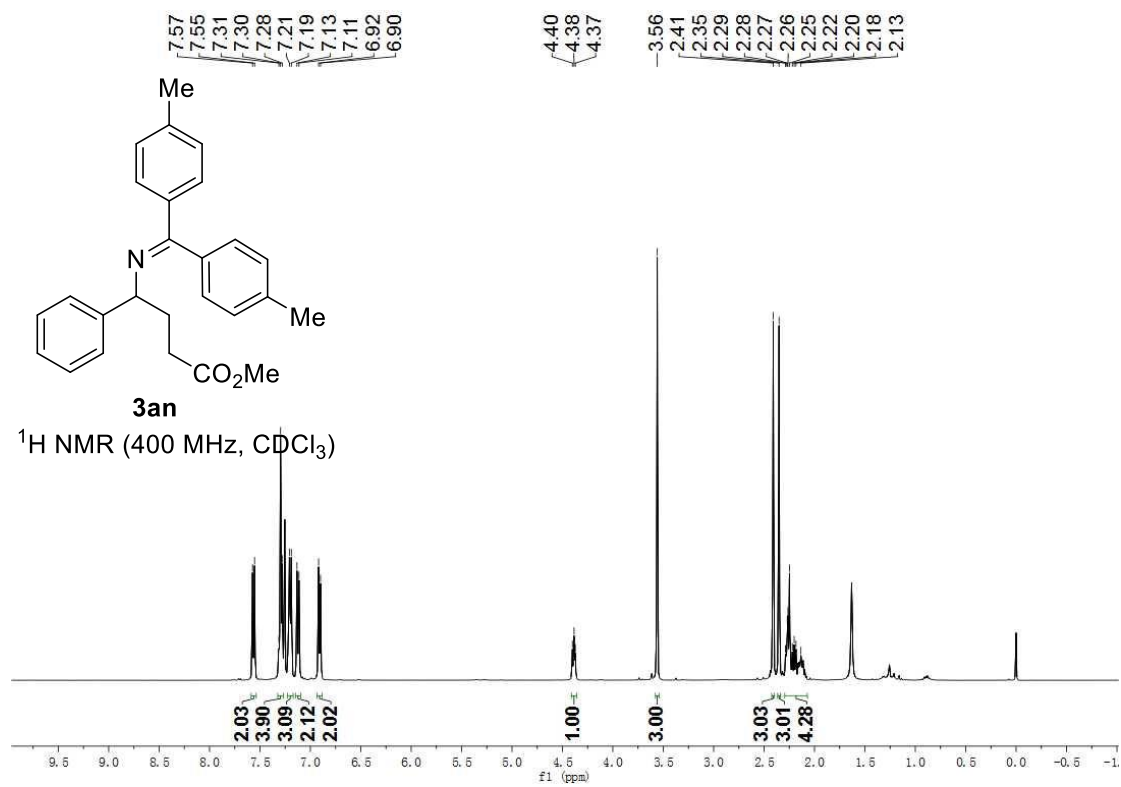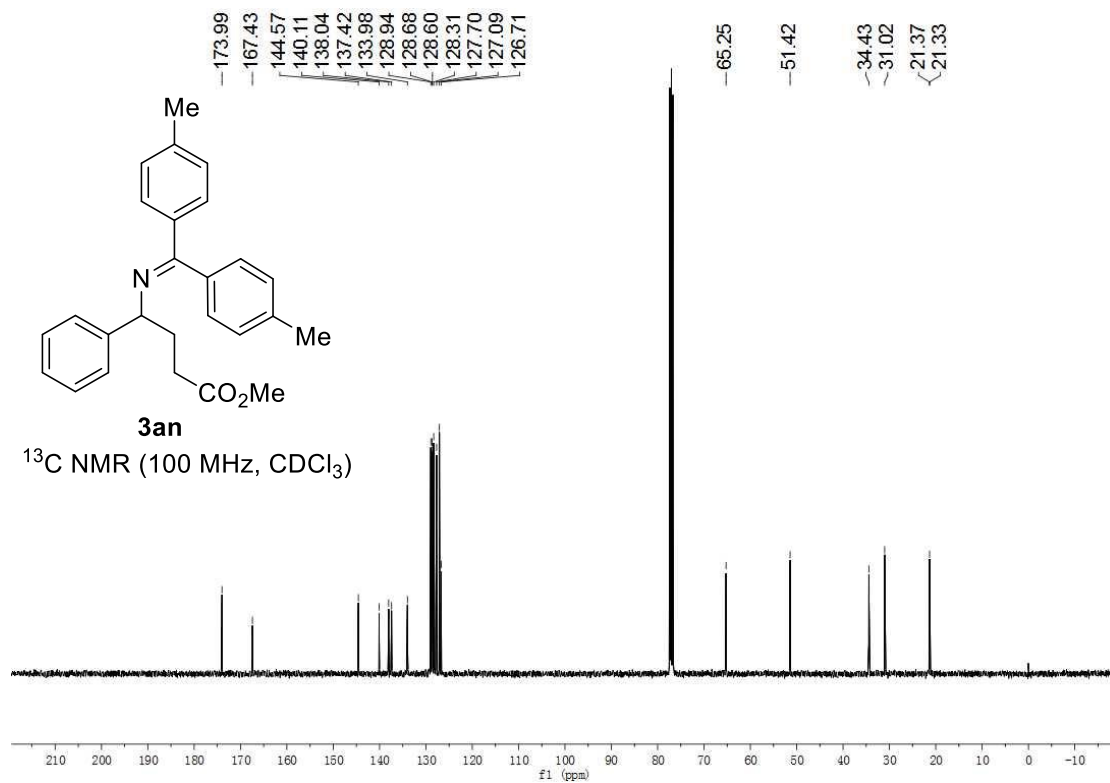

*Methyl 4-((bis(4-methoxyphenyl)methylene)amino)-4-phenylbutanoate (3ao)*

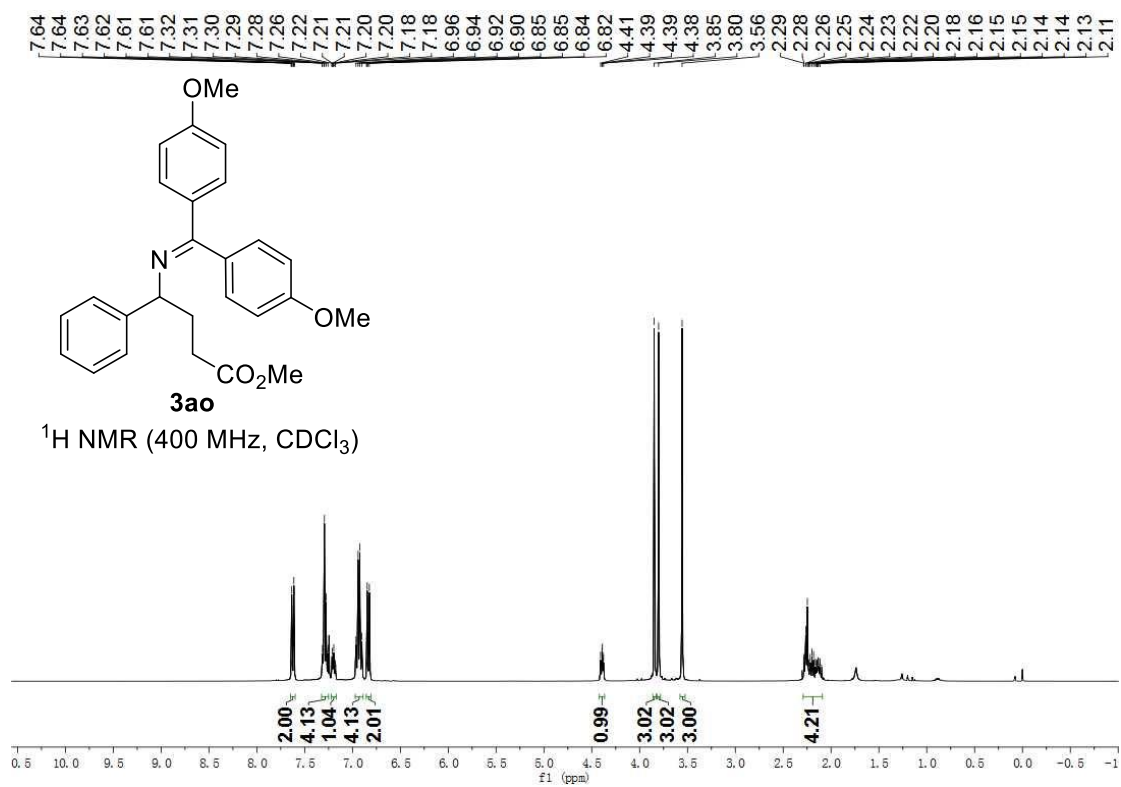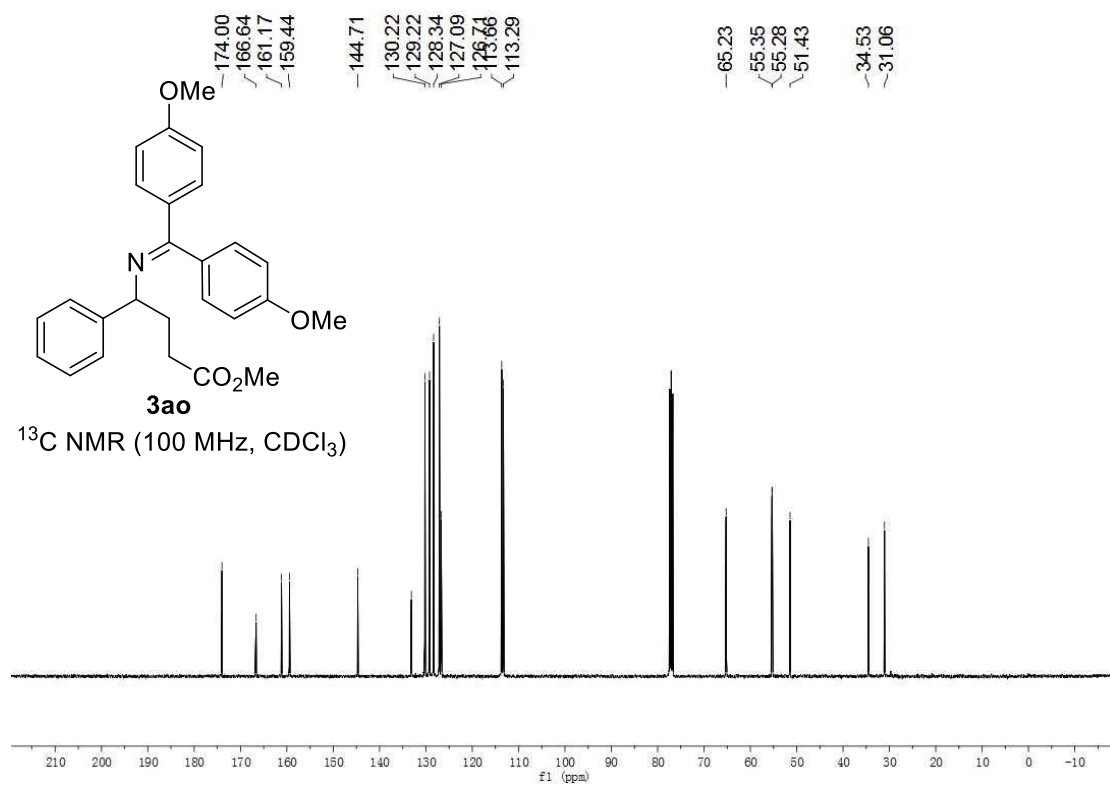

### 5-(p-Tolyl)pyrrolidin-2-one (4a)

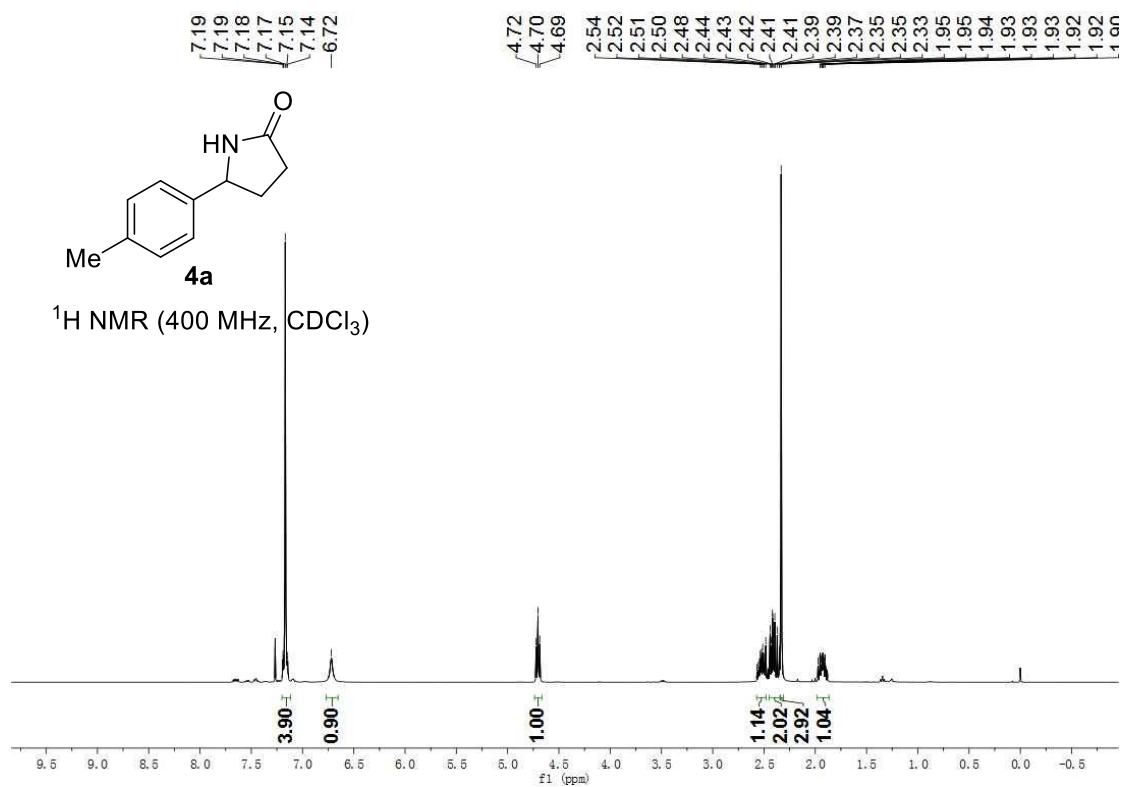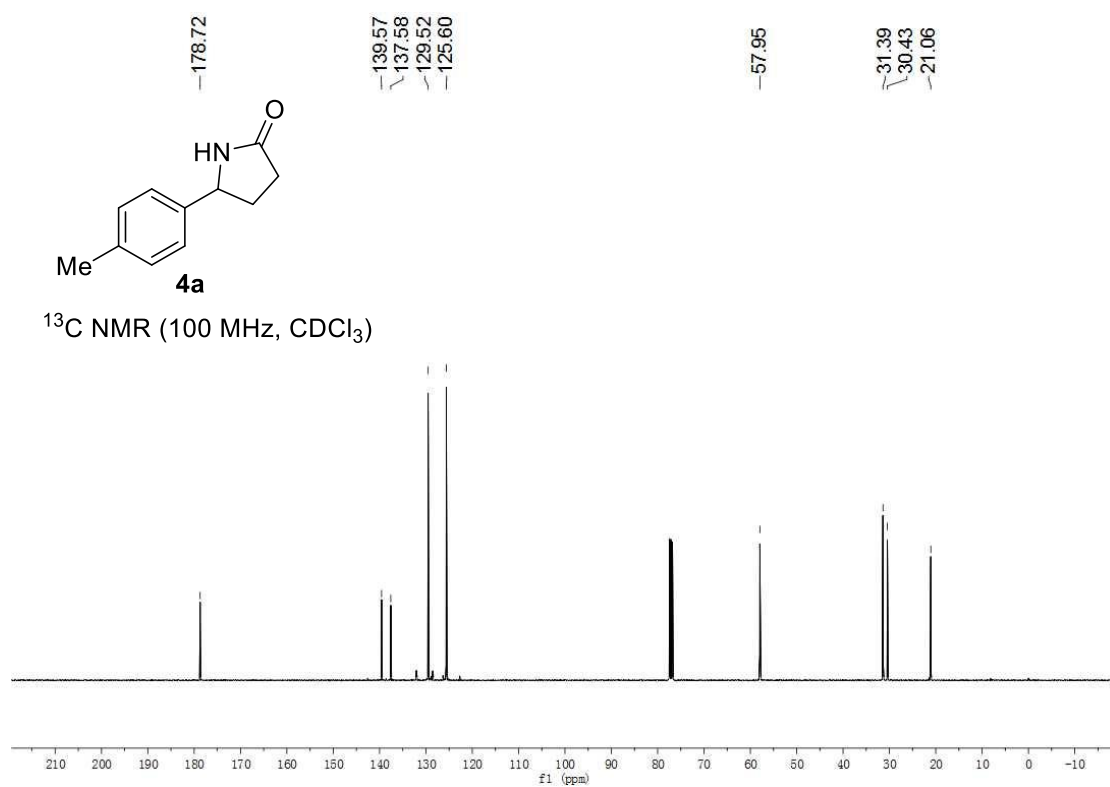

5-(*m*-Tolyl)pyrrolidin-2-one (**4b**)

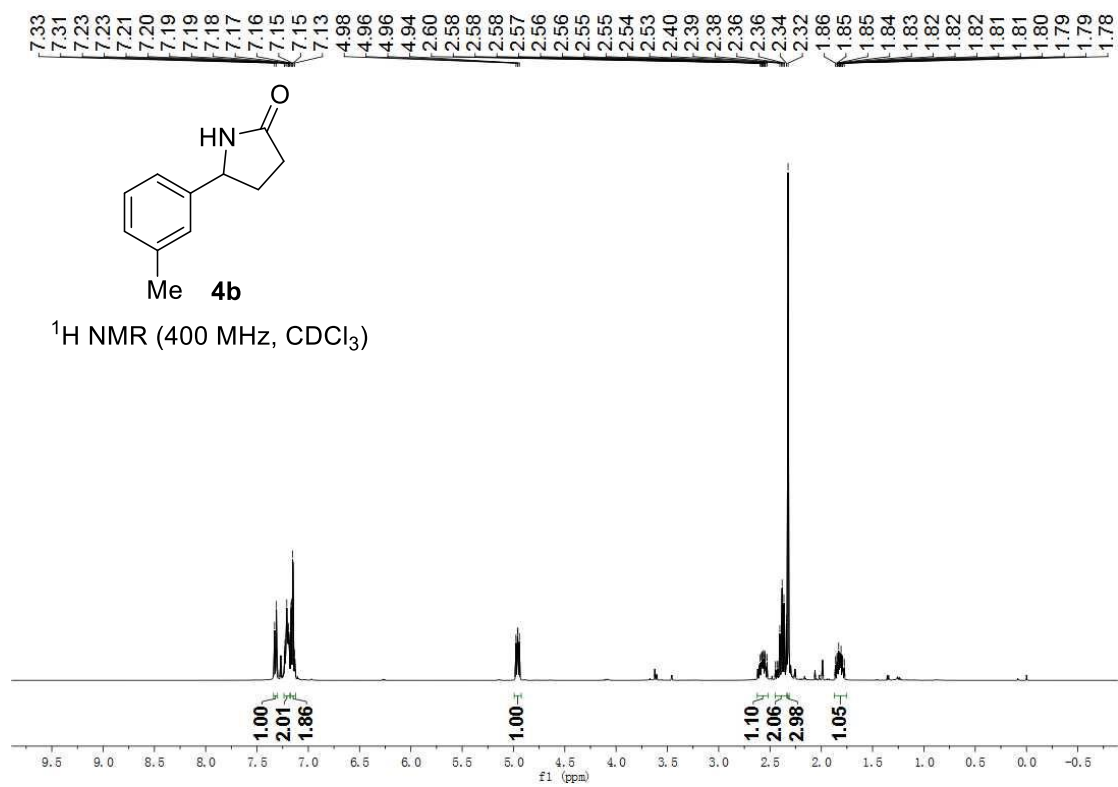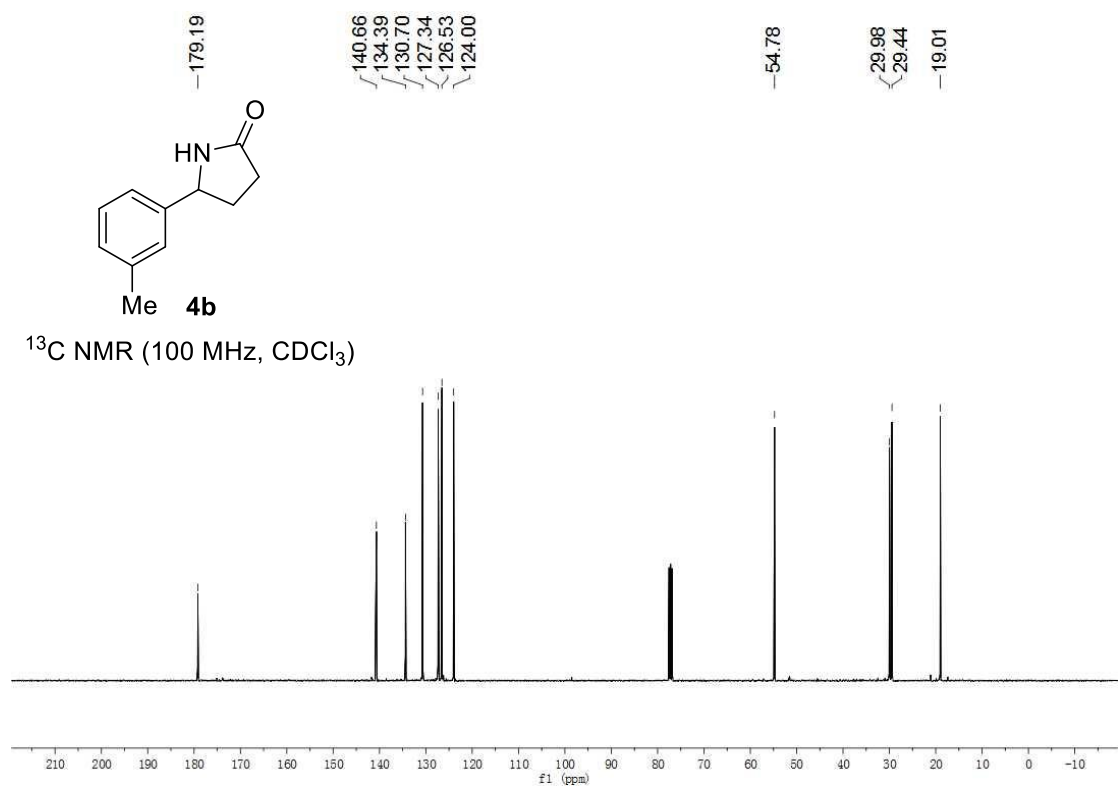

5-(*o*-Tolyl)pyrrolidin-2-one (4c)

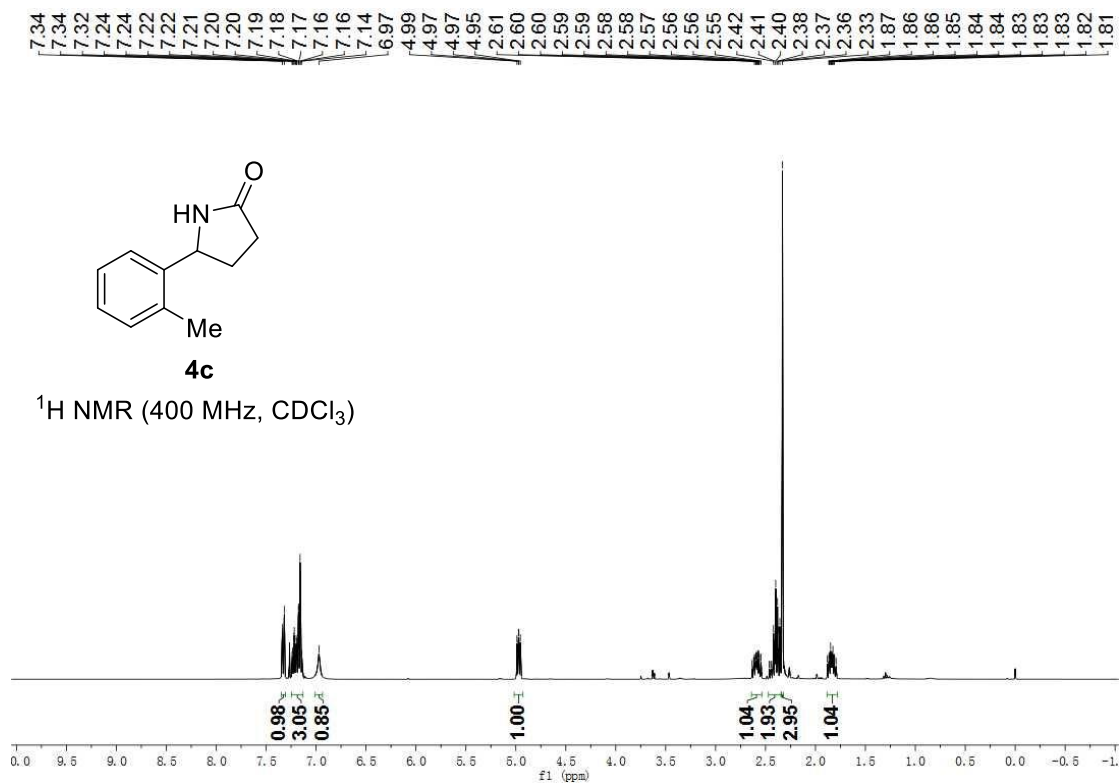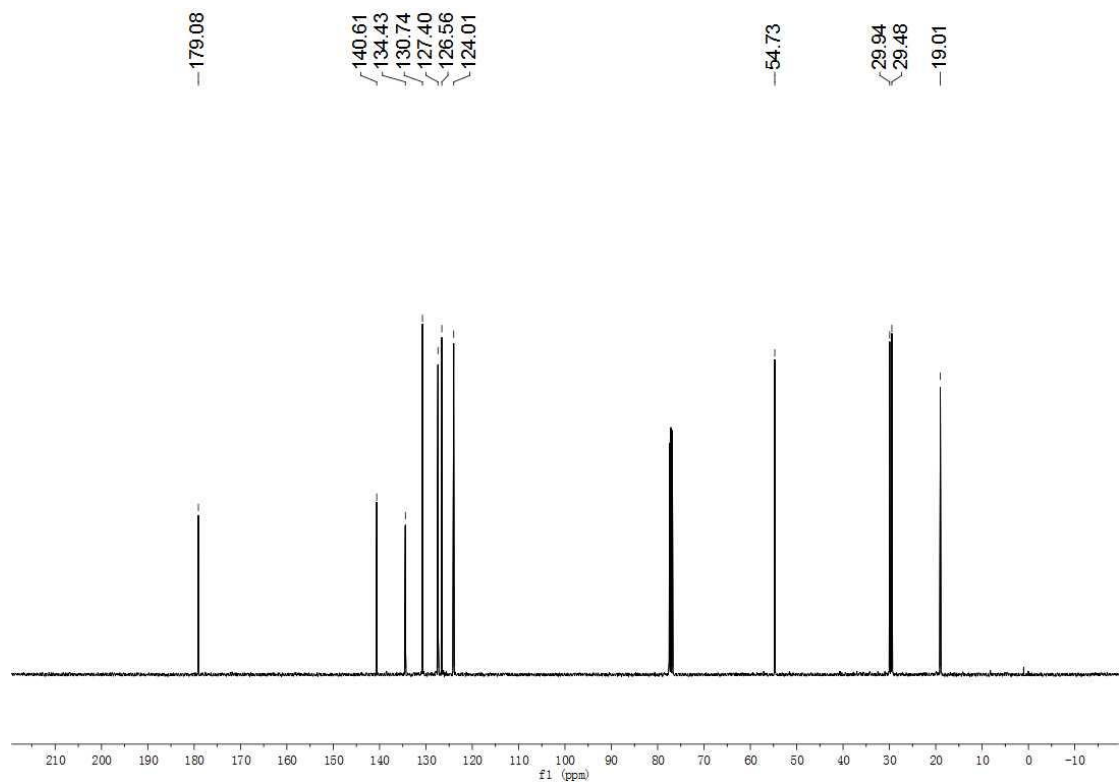

### 5-(4-Methoxyphenyl)pyrrolidin-2-one (4d)

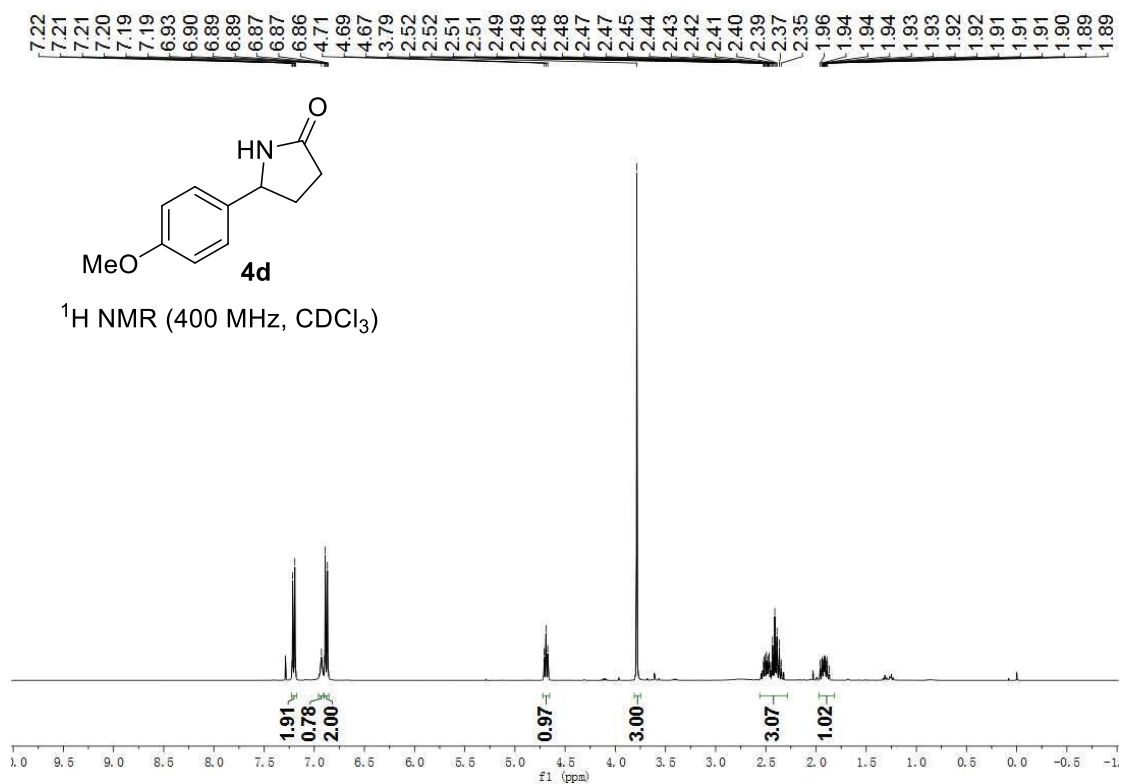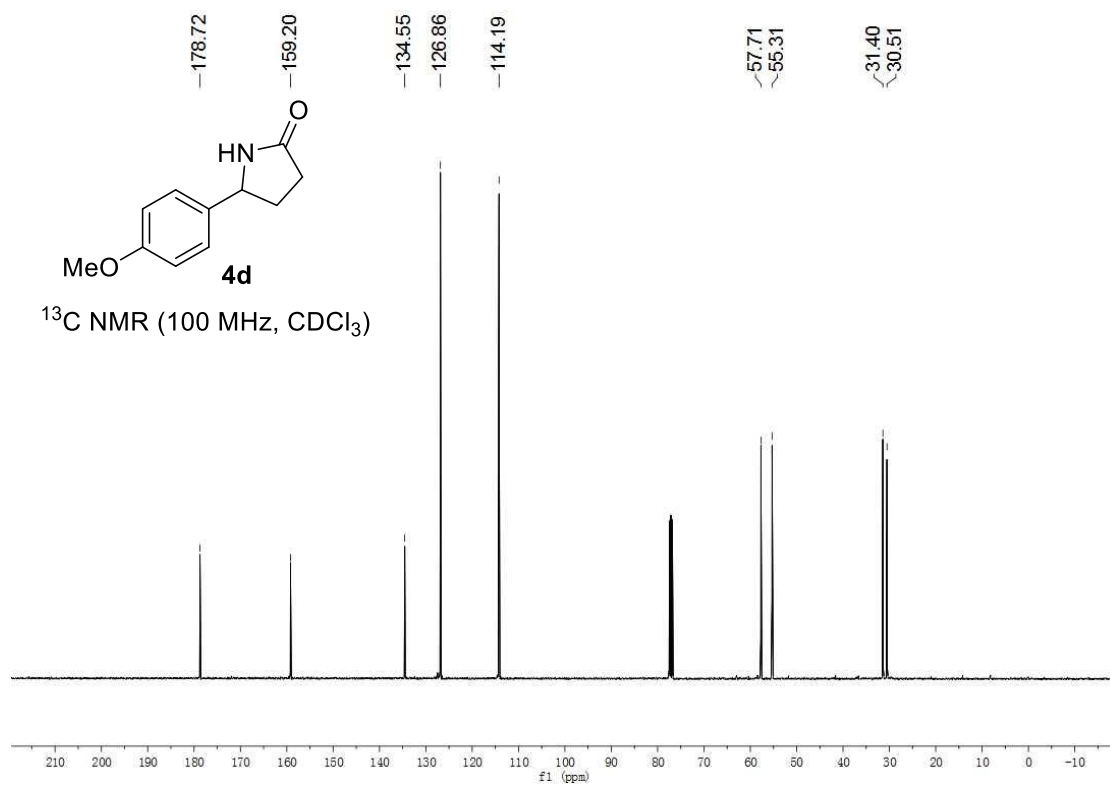



5-(4-(tert-Butyl)phenyl)pyrrolidin-2-one (4e)

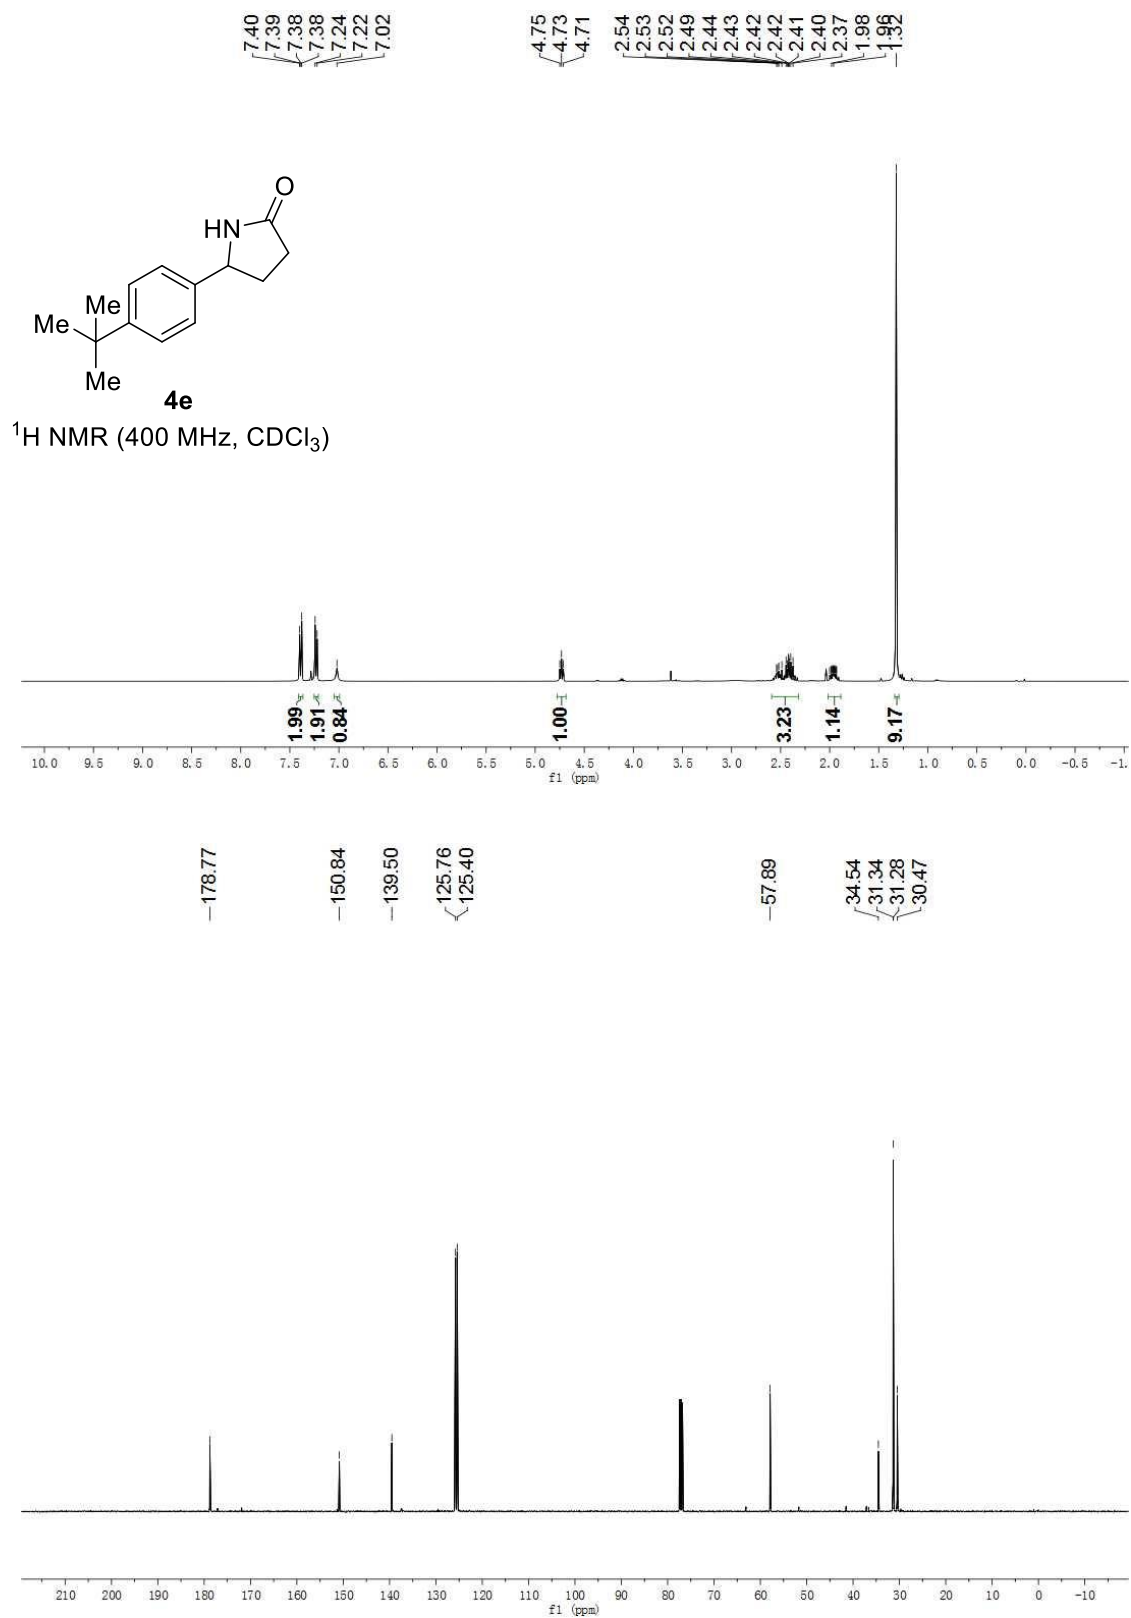

### 5-(4-Chlorophenyl)pyrrolidin-2-one (4f)

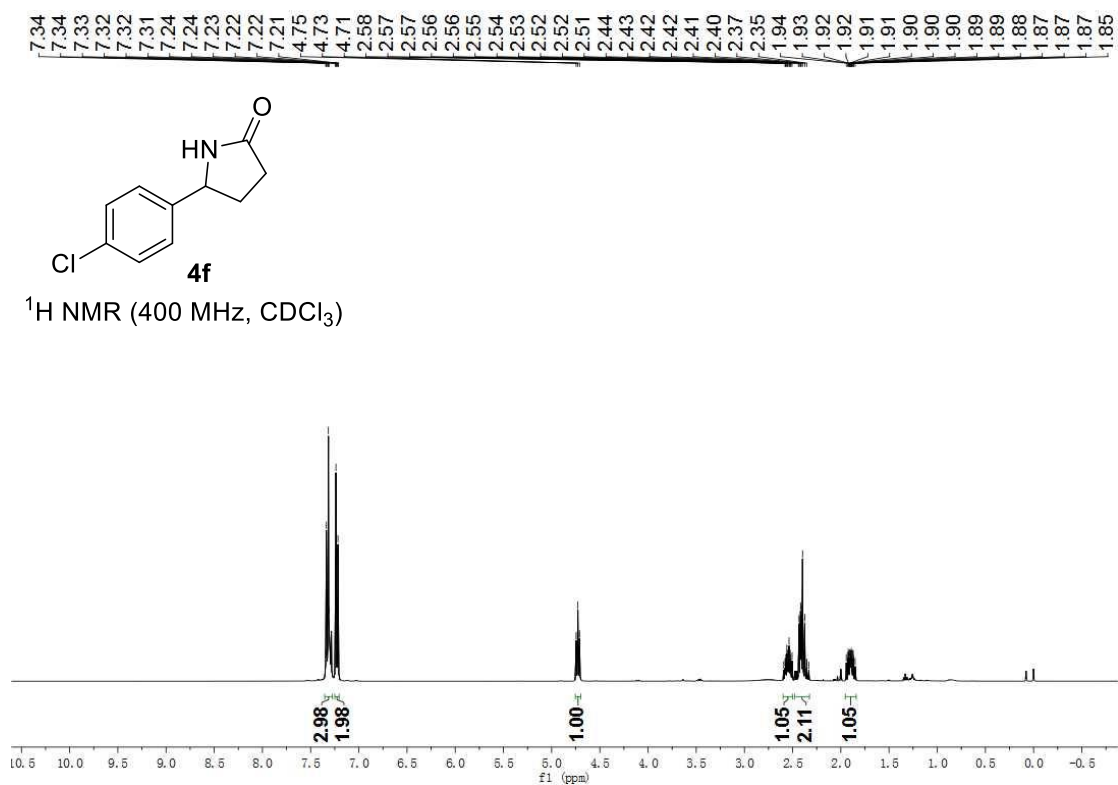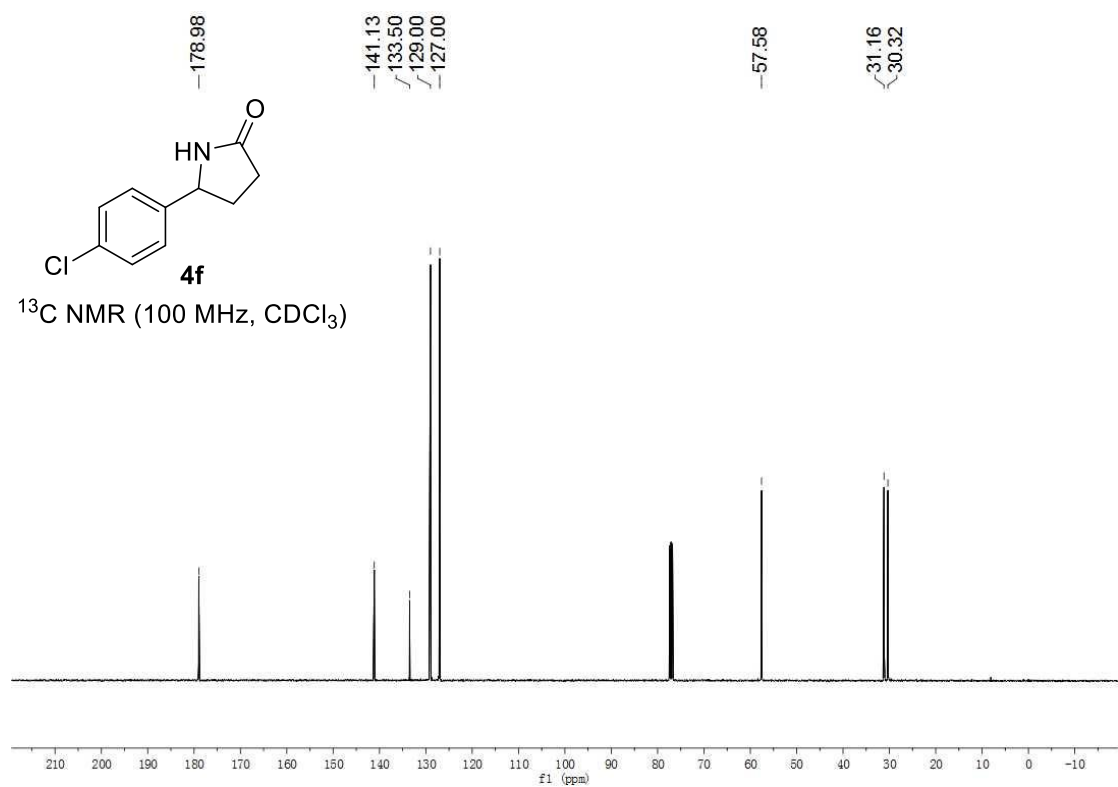

### 5-(3-Chlorophenyl)pyrrolidin-2-one (4g)

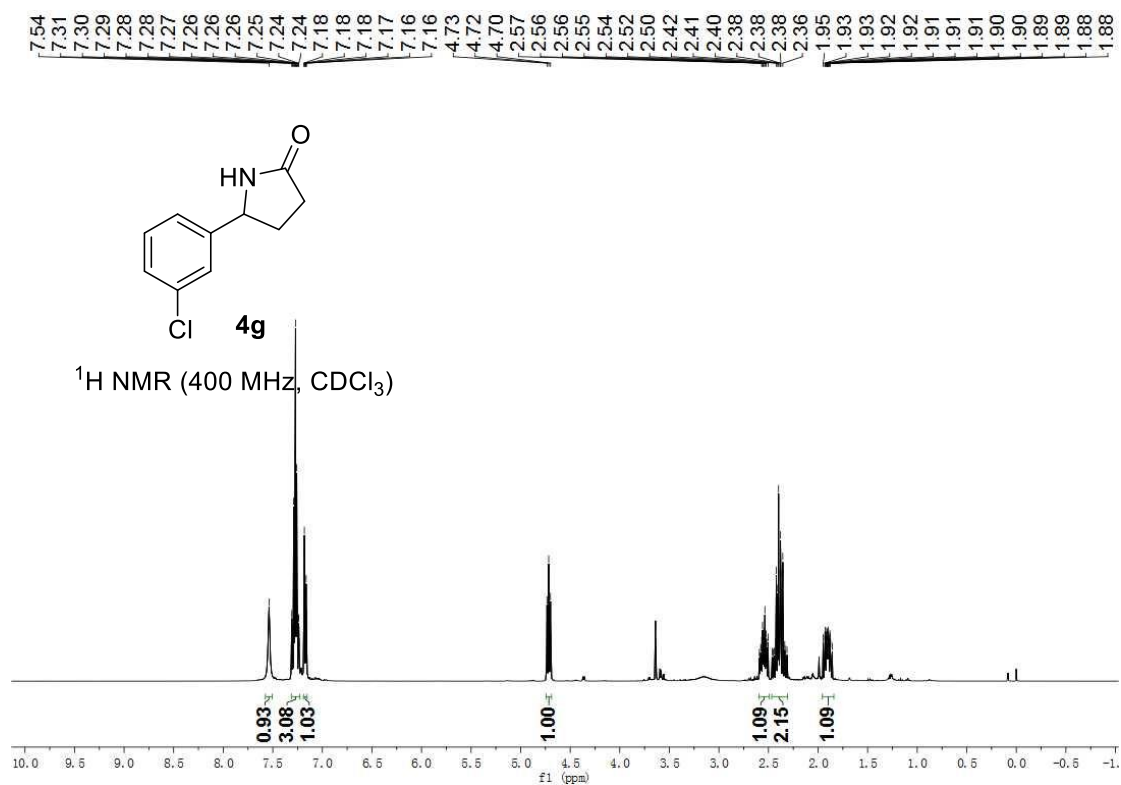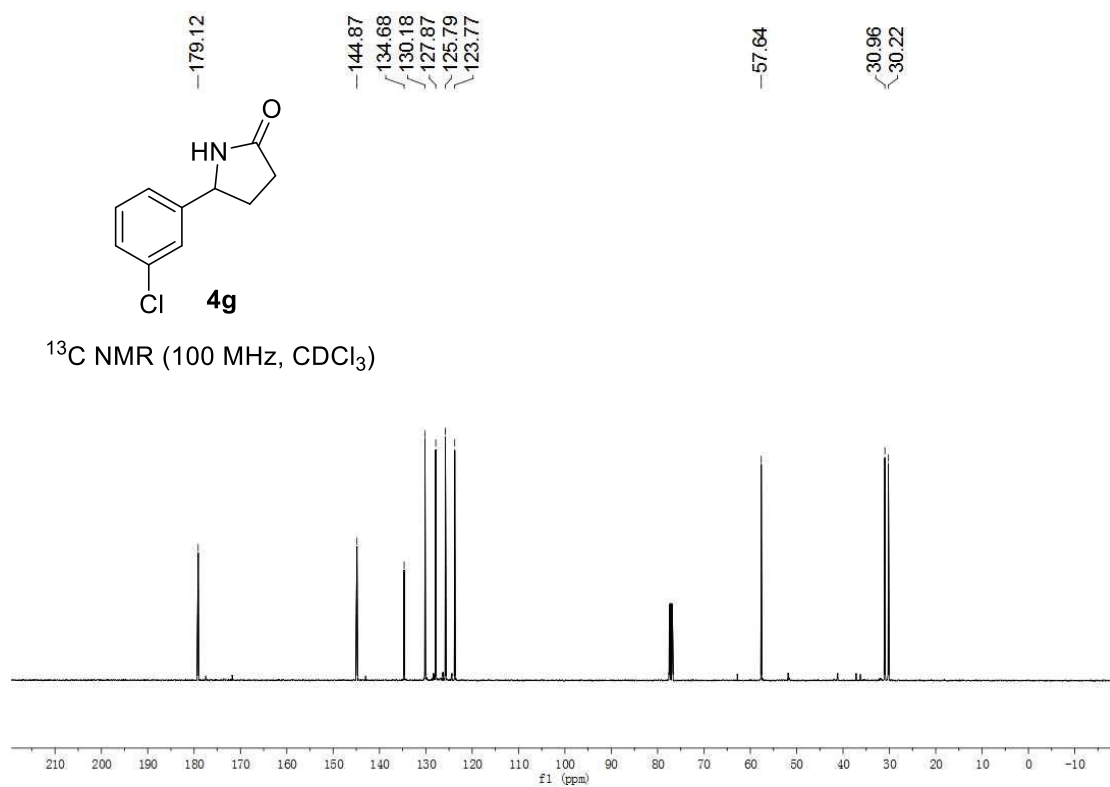

5-(4-(Chloromethyl)phenyl)pyrrolidin-2-one (4h)

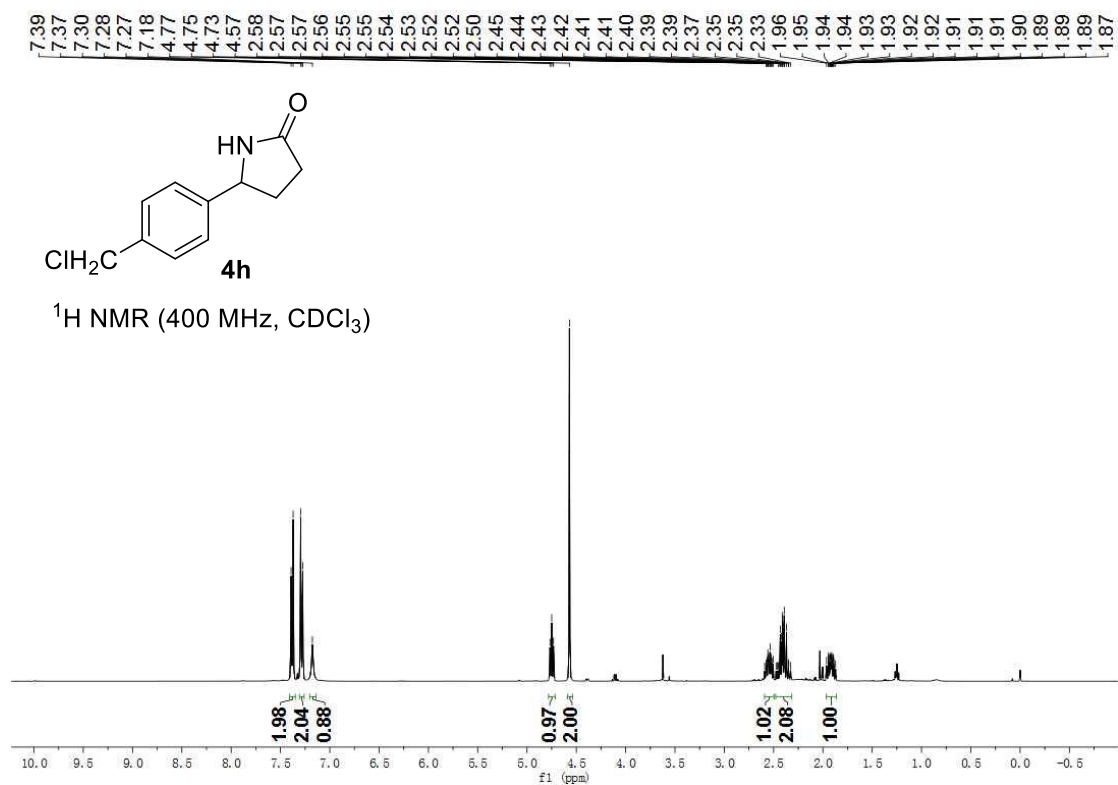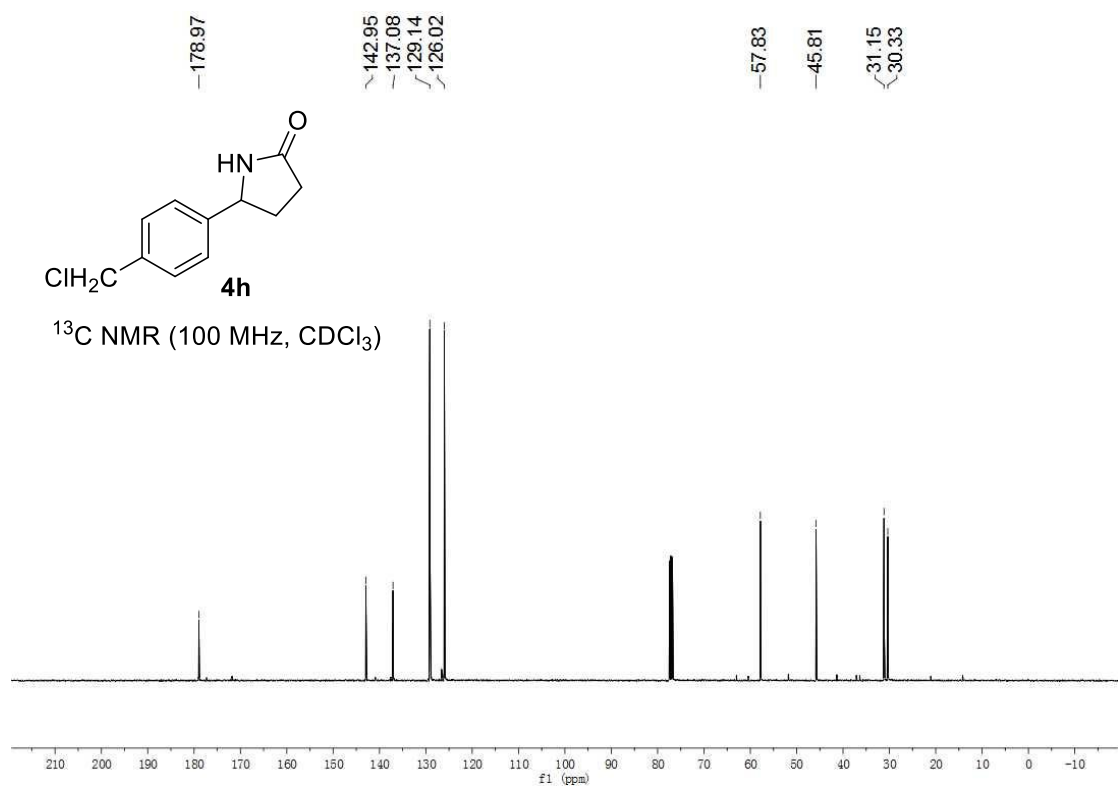

### 5-Tridecylpyrrolidin-2-one (4i)

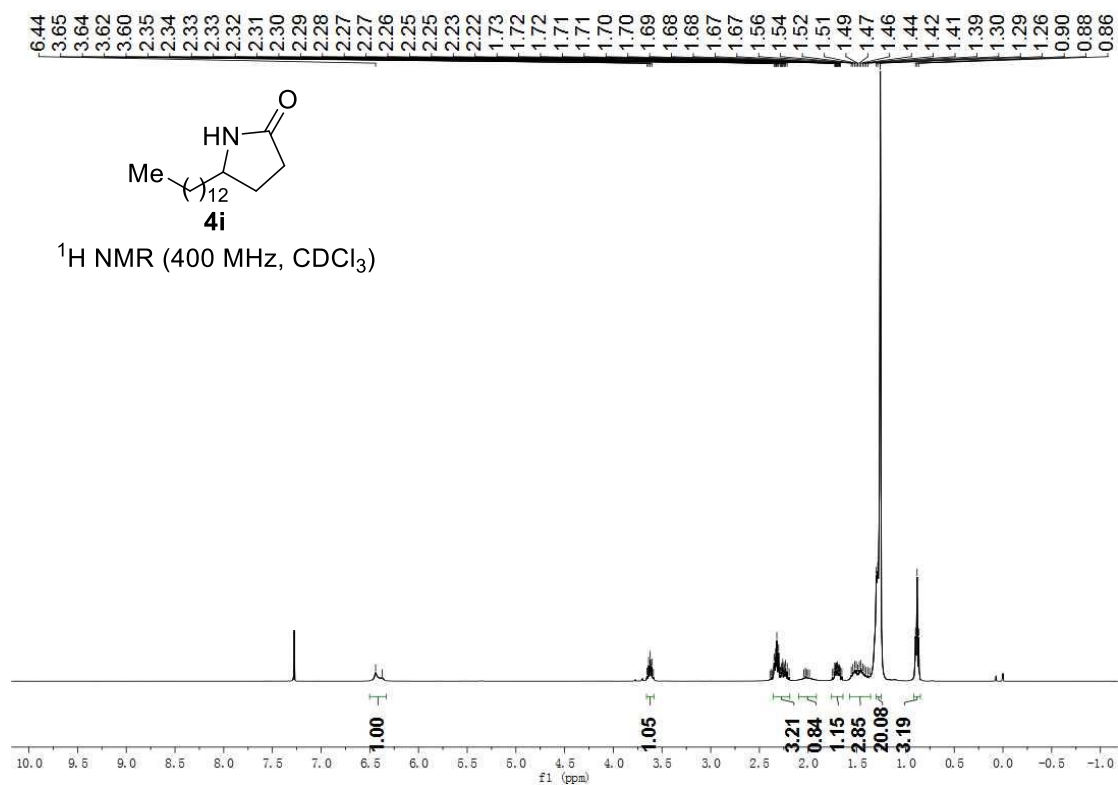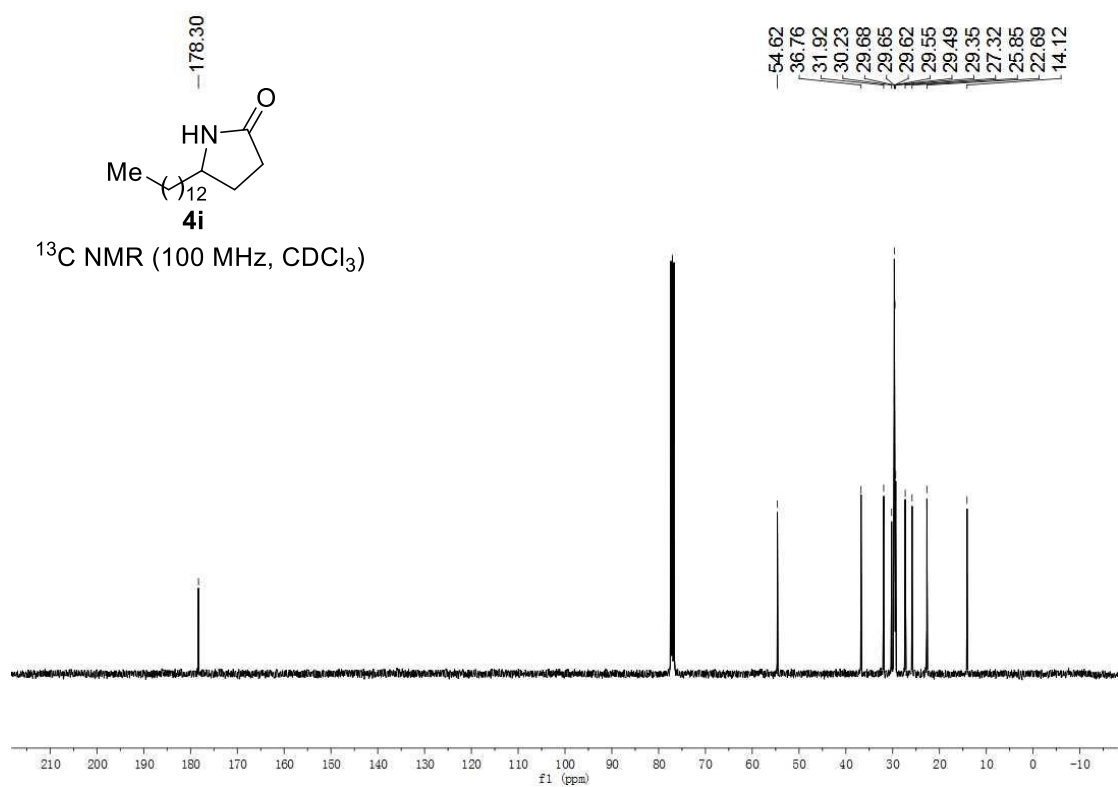

*Methyl 2-(2-amino-2-phenylcyclohexyl)acetate (5a)*

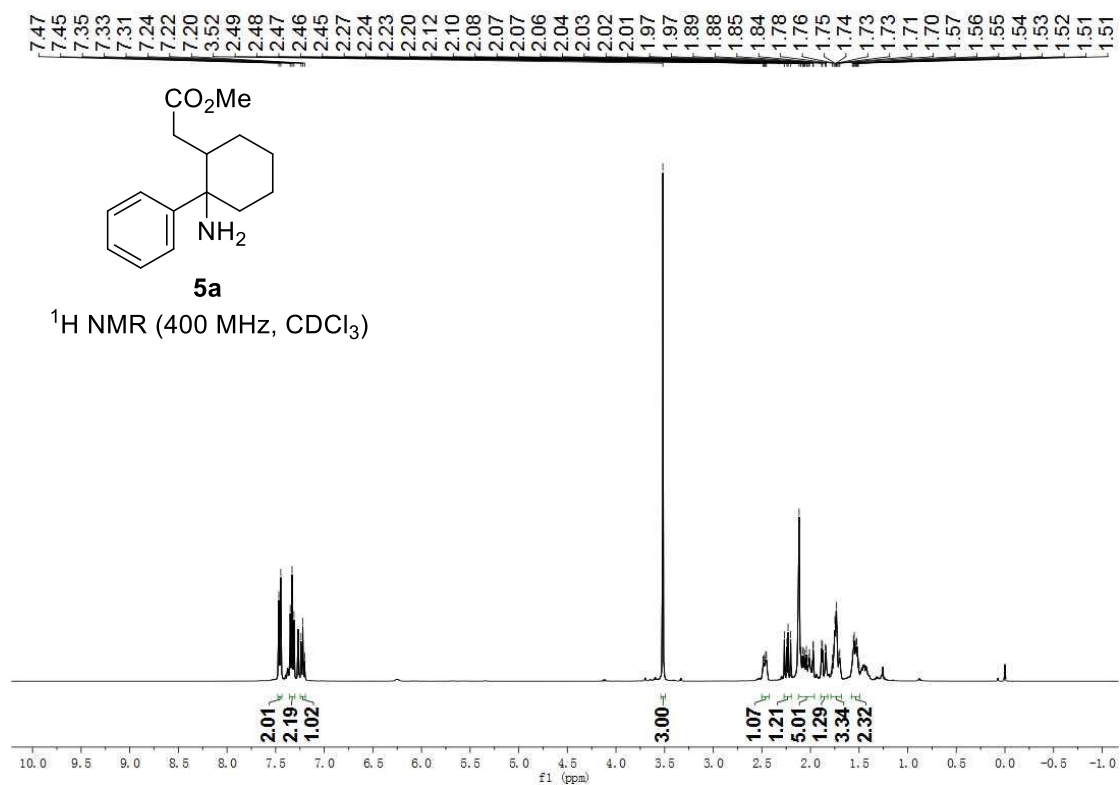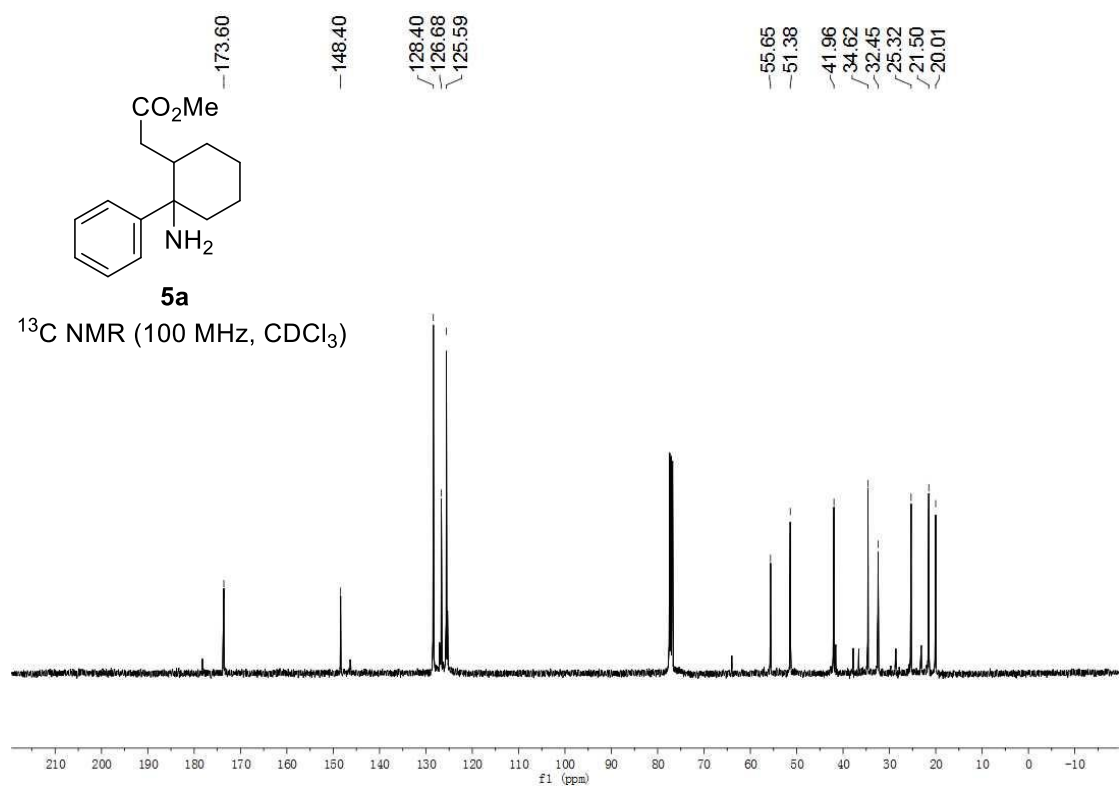

### 3-Carboxy-1-(p-tolyl)propan-1-aminium chloride (6b)

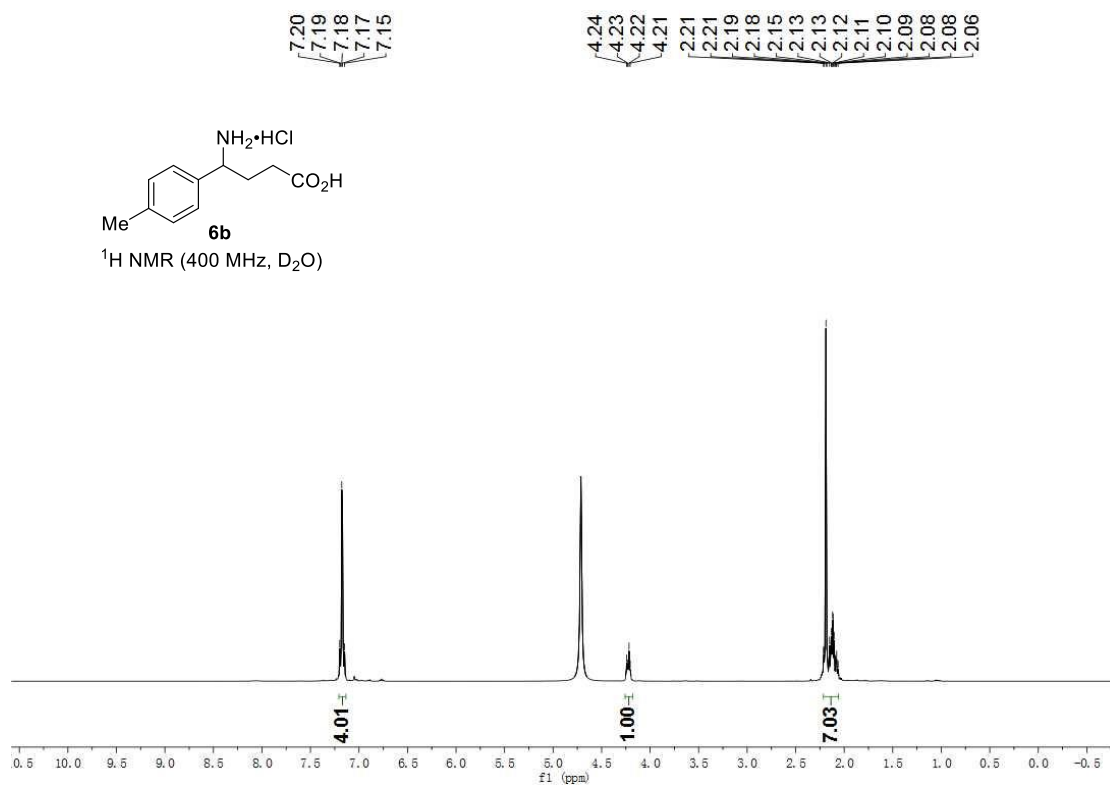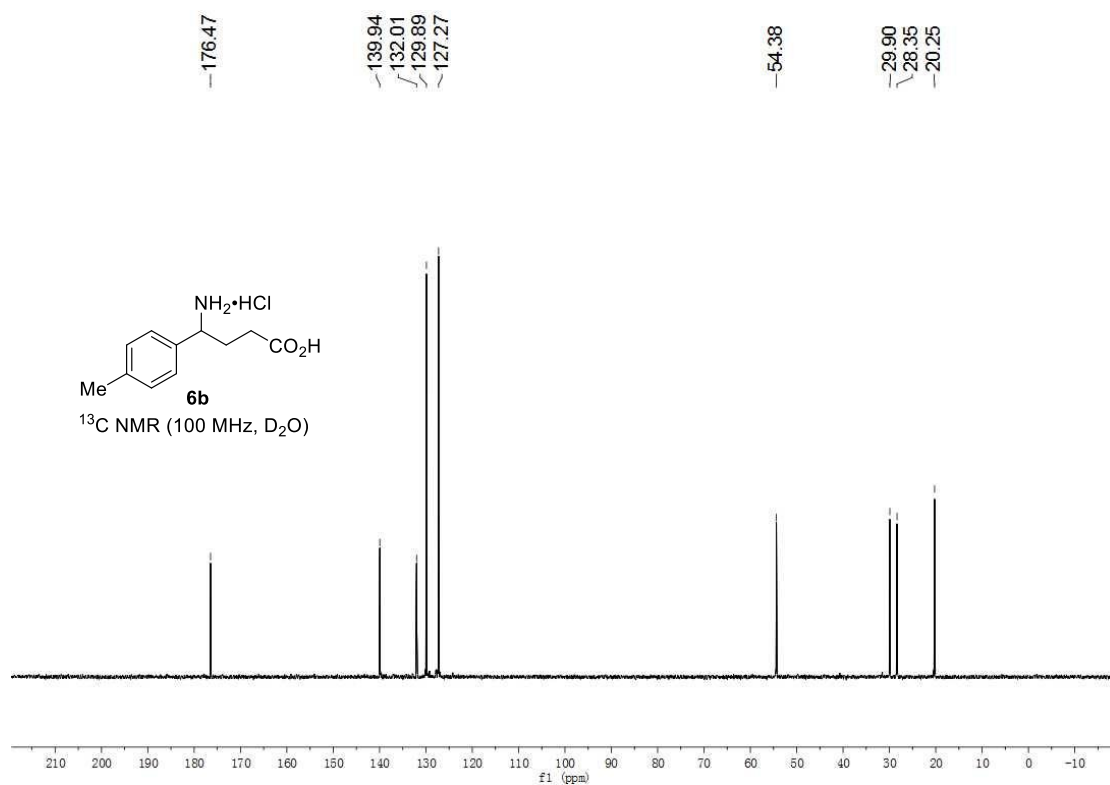

Supplement: d2qo00741j1.pdf [file d2qo00741j1.pdf]
